# Supplementary material for: Assessment of biomass potentials of microalgal communities in open pond raceways using mass cultivation
Source: PeerJ. 2020 Jul 16;8:e9418. doi: 10.7717/peerj.9418 (PMC7369025; doi:10.7717/peerj.9418)
Supplement: Data S2 [file peerj-08-9418-s019.xlsx]

## Sheet: Fig. 1A, 1B
OPR #1				OPR #3					Water Temp		pH
Date	pH	Water temp.		Date	pH	Water temp.			OPR#1	OPR#3	OPR#1	OPR#3
2017-04-01	8.06	18.6		2017-04-01	10.98	12		APR	20.7359	17.0121	9.51747	10.2876
2017-04-01	7.96	17.8		2017-04-01	10.82	11.3		MAY	24.4444	22.5004	9.8078	9.9026
2017-04-01	7.9	17.3		2017-04-01	10.73	10.9		JUN	26.7295	25.8118	10.0137	9.72055
2017-04-01	8.31	18.3		2017-04-01	11.1	11.9		JUL	28.8455	29.2473	9.33615	8.98321
2017-04-01	9.32	22.2		2017-04-01	11.33	15.8		AUG	29.6839	28.8915	7.42056	7.59525
2017-04-01	9.22	22.5		2017-04-01	11.32	16		SEP	26.2573	23.6496	7.9625	8.2921
2017-04-01	8.35	21.3		2017-04-01	11.3	14.4		OCT	20.883	17.0584	7.82711	7.38486
2017-04-01	7.89	19.9		2017-04-01	11.23	12.9		NOV	14.9064	9.0557	8.54555	8.51502
2017-04-02	7.82	18.9		2017-04-02	11.13	11.9
2017-04-02	7.81	17.8		2017-04-02	11.03	10.8
2017-04-02	8.1	17.3		2017-04-02	11.06	10.1
2017-04-02	9.39	20.2		2017-04-02	11.33	13.4
2017-04-02	10.06	24.6		2017-04-02	11.26	17.4
2017-04-02	10.32	25.6		2017-04-02	11.23	17.9
2017-04-02	9.98	24.1		2017-04-02	11.2	16
2017-04-02	9.62	22.2		2017-04-02	11.15	14
2017-04-03	9.26	20.6		2017-04-03	11.06	12.3
2017-04-03	8.78	19.1		2017-04-03	10.95	10.8
2017-04-03	8.61	18.6		2017-04-03	11.01	10.2
2017-04-03	9.47	21.6		2017-04-03	11.31	13.8
2017-04-03	9.77	24.5		2017-04-03	11.2	18.4
2017-04-03	9.59	24.2		2017-04-03	11.14	19.4
2017-04-03	8.89	23.1		2017-04-03	10.93	17.4
2017-04-03	8.04	21.8		2017-04-03	10.8	15.6
2017-04-04	7.81	20.4		2017-04-04	10.66	13.8
2017-04-04	7.77	19.1		2017-04-04	10.5	12.3
2017-04-04	8.03	18.6		2017-04-04	10.58	11.6
2017-04-04	8.82	20.8		2017-04-04	11.18	14.9
2017-04-04	9.21	23.8		2017-04-04	11.18	19.3
2017-04-04	8.92	24.1		2017-04-04	11.1	20
2017-04-04	7.82	22.6		2017-04-04	11.06	18.6
2017-04-04	7.71	21.1		2017-04-04	10.93	17.2
2017-04-05	7.7	19.9		2017-04-05	10.8	16
2017-04-05	7.72	18.9		2017-04-05	10.61	15.1
2017-04-05	7.83	18.1		2017-04-05	10.56	14.3
2017-04-05	8.35	18.8		2017-04-05	11.02	15.3
2017-04-05	8.07	19.4		2017-04-05	11.17	15.7
2017-04-05	7.87	19.7		2017-04-05	11.19	15.7
2017-04-05	7.74	19.3		2017-04-05	11.09	15.2
2017-04-05	7.76	18.9		2017-04-05	10.94	14.9
2017-04-06	7.79	18.7		2017-04-06	10.77	14.8
2017-04-06	7.81	18.5		2017-04-06	10.55	14.9
2017-04-06	7.81	18.5		2017-04-06	10.44	15
2017-04-06	7.82	18.7		2017-04-06	10.52	15.3
2017-04-09	7.2	18.7		2017-04-06	10.85	17.5
2017-04-09	8.21	19.2		2017-04-06	10.85	18.1
2017-04-09	7.94	19.6		2017-04-06	10.71	17.4
2017-04-09	7.77	19.2		2017-04-06	10.44	16.3
2017-04-09	7.85	18.5		2017-04-07	10.23	15.2
2017-04-10	7.89	17.8		2017-04-07	10.04	14.2
2017-04-10	7.93	17		2017-04-07	10.5	13.7
2017-04-10	8.17	16.9		2017-04-07	10.81	16.8
2017-04-10	8.99	20.2		2017-04-07	10.67	21.4
2017-04-10	9.53	22.7		2017-04-07	10.62	23.1
2017-04-10	9.53	23.6		2017-04-07	10.55	21.2
2017-04-10	8.54	21.9		2017-04-07	10.34	19.2
2017-04-10	7.92	20.5		2017-04-08	10.12	17.7
2017-04-11	7.82	19.4		2017-04-08	9.95	16.5
2017-04-11	7.81	18.3		2017-04-08	9.94	15.8
2017-04-11	7.99	17.3		2017-04-08	10.49	18.7
2017-04-11	9.14	17.6		2017-04-08	10.3	22.9
2017-04-11	10.02	20.8		2017-04-08	10.45	24
2017-04-11	10.51	22.1		2017-04-08	10.56	21.8
2017-04-11	10.27	20.7		2017-04-08	10.18	19.9
2017-04-11	9.98	19.3		2017-04-09	9.95	18.7
2017-04-12	9.73	17.7		2017-04-09	9.75	17.6
2017-04-12	9.48	16.5		2017-04-09	9.78	17
2017-04-12	9.39	15.8		2017-04-09	10.22	17.4
2017-04-12	9.85	17.3		2017-04-09	10.28	16.8
2017-04-12	10.51	20.6		2017-04-09	10.52	16.5
2017-04-12	10.94	22.3		2017-04-09	10.49	15.4
2017-04-12	10.79	20.9		2017-04-09	10.29	14.4
2017-04-12	10.51	19.2		2017-04-10	10.17	13.3
2017-04-13	10.22	17.7		2017-04-10	10.03	12.3
2017-04-13	9.97	16.4		2017-04-10	10.09	11.9
2017-04-13	9.96	16.1		2017-04-10	10.39	15.8
2017-04-13	10.54	18.8		2017-04-10	10.78	21.2
2017-04-13	11.01	22.3		2017-04-10	9.43	14.4
2017-04-13	11.03	23.2		2017-04-10	8.3	13.8
2017-04-13	10.87	21.7		2017-04-11	8.1	12.2
2017-04-13	10.62	20.2		2017-04-11	8.05	13.5
2017-04-14	10.32	18.8		2017-04-11	8.11	13.1
2017-04-14	10.04	17.7		2017-04-11	8.59	14.1
2017-04-14	10.02	17.4		2017-04-11	9.32	17.9
2017-04-14	10.58	19.4		2017-04-11	9.66	19.4
2017-04-14	10.98	21.4		2017-04-11	9.59	17.7
2017-04-14	10.96	21.8		2017-04-11	9.38	16.1
2017-04-14	10.81	20.7		2017-04-12	9.23	14
2017-04-14	10.53	19.6		2017-04-12	9.06	12.7
2017-04-15	10.23	18.8		2017-04-12	9.19	12.1
2017-04-15	9.93	18		2017-04-12	9.78	14.1
2017-04-15	10.02	18		2017-04-12	9.97	18.1
2017-04-15	10.91	21		2017-04-12	10.01	18.1
2017-04-15	11.11	23.8		2017-04-12	9.92	16.1
2017-04-15	11.05	24.3		2017-04-12	9.78	14.6
2017-04-15	10.88	22.9		2017-04-13	9.65	13.3
2017-04-15	10.62	21.3		2017-04-13	9.53	12
2017-04-16	10.31	19.9		2017-04-13	9.6	11.6
2017-04-16	10.01	18.8		2017-04-13	10.18	14.6
2017-04-16	9.99	18.5		2017-04-13	10.97	18.5
2017-04-16	10.6	20.8		2017-04-13	11.13	19.6
2017-04-16	11.08	24.3		2017-04-13	11.17	17.6
2017-04-16	11.07	25.8		2017-04-13	11.02	16
2017-04-16	10.97	24.4		2017-04-14	10.83	14.7
2017-04-16	10.74	22.7		2017-04-14	10.56	13.6
2017-04-17	10.44	21.4		2017-04-14	10.66	13.2
2017-04-17	10.12	20.3		2017-04-14	11.21	15.3
2017-04-17	9.9	19.8		2017-04-14	11.28	17.6
2017-04-17	9.87	19.5		2017-04-14	11.27	17.9
2017-04-17	9.84	19		2017-04-14	11.22	16.5
2017-04-17	9.71	18.4		2017-04-14	11.12	15.4
2017-04-17	9.52	18		2017-04-15	10.98	14.8
2017-04-17	9.21	17.5		2017-04-15	10.81	14.2
2017-04-18	8.78	16.9		2017-04-15	10.92	14.1
2017-04-18	8.32	16.3		2017-04-15	11.22	17.7
2017-04-18	8.82	16.3		2017-04-15	11.1	21.3
2017-04-18	9.92	19.4		2017-04-15	11.04	21.7
2017-04-18	10.47	22.8		2017-04-15	11.05	20.2
2017-04-18	10.31	22.8		2017-04-15	10.96	18.5
2017-04-18	10.05	21.9		2017-04-16	10.81	17.1
2017-04-18	9.69	20.7		2017-04-16	10.71	15.9
2017-04-19	9.29	19.6		2017-04-16	10.84	15.4
2017-04-19	8.64	18.7		2017-04-16	11.13	18.2
2017-04-19	9.13	18.8		2017-04-16	11.01	22.2
2017-04-19	10.23	22		2017-04-16	10.95	23.8
2017-04-19	10.85	26.4		2017-04-16	10.92	22.1
2017-04-19	10.97	28.1		2017-04-16	10.83	20.4
2017-04-19	10.7	26		2017-04-17	10.7	19.1
2017-04-19	10.36	23.7		2017-04-17	10.52	18
2017-04-20	10.02	21.9		2017-04-17	10.3	17.5
2017-04-20	9.69	20.5		2017-04-17	10.42	17.3
2017-04-20	9.62	19.7		2017-04-17	10.51	16.9
2017-04-20	10.37	21.1		2017-04-17	10.69	16.3
2017-04-20	10.56	21.2		2017-04-17	10.68	15.9
2017-04-20	10.03	20.6		2017-04-17	10.55	15.4
2017-04-20	9.48	20.1		2017-04-18	10.45	14.8
2017-04-20	9.11	19.3		2017-04-18	10.32	14
2017-04-21	8.56	18.6		2017-04-18	10.51	13.8
2017-04-21	8.15	17.9		2017-04-18	10.85	17.2
2017-04-21	8.79	17.9		2017-04-18	10.85	20.9
2017-04-21	9.93	20.8		2017-04-18	10.85	20.7
2017-04-21	10.52	23.5		2017-04-18	10.8	18.5
2017-04-21	10.65	24		2017-04-18	10.7	16.2
2017-04-21	10.34	22.3		2017-04-19	10.6	14
2017-04-21	10.03	20.7		2017-04-19	10.42	12.7
2017-04-22	9.76	19.4		2017-04-19	10.71	12.4
2017-04-22	9.47	18.4		2017-04-19	11	15.4
2017-04-22	9.45	18.2		2017-04-19	10.91	19.1
2017-04-22	9.89	21.2		2017-04-19	10.85	20.3
2017-04-22	10.51	24.7		2017-04-19	10.83	18.4
2017-04-22	10.62	24.9		2017-04-19	10.69	17
2017-04-22	10.29	23.1		2017-04-20	10.54	15.8
2017-04-22	9.98	21.3		2017-04-20	10.35	14.9
2017-04-23	9.68	20		2017-04-20	10.48	14.5
2017-04-23	9.37	18.7		2017-04-20	10.96	16.3
2017-04-23	9.49	18.6		2017-04-20	10.95	17.2
2017-04-23	10.29	21.9		2017-04-20	10.94	16.4
2017-04-23	10.97	25.8		2017-04-20	10.77	15.8
2017-04-23	11.08	26.6		2017-04-20	10.63	15
2017-04-23	10.96	24.5		2017-04-21	10.44	14.2
2017-04-23	10.72	22.6		2017-04-21	10.25	13.4
2017-04-24	10.42	21.1		2017-04-21	10.53	13.1
2017-04-24	10.15	19.8		2017-04-21	10.93	16.1
2017-04-24	10.2	19.7		2017-04-21	10.83	19.7
2017-04-24	10.59	22.4		2017-04-21	10.74	20.7
2017-04-24	7.08	30.6		2017-04-21	10.8	18.9
2017-04-24	7.2	30		2017-04-21	10.63	17.5
2017-04-24	7.39	19.6		2017-04-22	10.47	16.1
2017-04-24	7.52	15.7		2017-04-22	10.28	15
2017-04-25	7.59	13.4		2017-04-22	10.57	14.6
2017-04-25	7.64	12.4		2017-04-22	10.91	17.9
2017-04-25	7.71	14.7		2017-04-22	10.7	22.1
2017-04-25	9.05	19.7		2017-04-22	10.59	22.5
2017-04-25	9.77	22.4		2017-04-22	10.58	20.6
2017-04-25	10.01	23		2017-04-22	10.35	18.6
2017-04-25	9.66	22.3		2017-04-23	10.13	17.1
2017-04-25	9.28	21.6		2017-04-23	9.91	15.7
2017-04-26	8.82	20.7		2017-04-23	10.23	15.3
2017-04-26	8.2	20		2017-04-23	10.78	18.7
2017-04-26	8.5	19.7		2017-04-23	10.58	22.9
2017-04-26	9.53	20.9		2017-04-23	10.55	23.7
2017-04-26	10.36	24.1		2017-04-23	10.49	21.2
2017-04-26	10.76	25.1		2017-04-23	10.26	19.4
2017-04-26	10.65	23.1		2017-04-24	9.96	17.8
2017-04-26	10.38	21.3		2017-04-24	9.68	16.4
2017-04-27	10.12	19.7		2017-04-24	9.93	16
2017-04-27	9.87	18.4		2017-04-24	10.76	19.3
2017-04-27	9.87	17.8		2017-04-24	10.73	23.2
2017-04-27	9.65	20.4		2017-04-24	10.74	23.5
2017-04-27	10.02	23.7		2017-04-24	10.63	20
2017-04-27	10.32	24.3		2017-04-24	10.25	18.1
2017-04-27	10	22.7		2017-04-25	9.87	17
2017-04-27	9.59	20.8		2017-04-25	9.48	16.2
2017-04-28	9.15	19.3		2017-04-25	9.63	16.1
2017-04-28	8.43	18		2017-04-25	10.27	18.4
2017-04-28	8.75	17.8		2017-04-25	9.93	21.8
2017-04-28	9.92	20.5		2017-04-25	9.9	21.9
2017-04-28	10.61	24.1		2017-04-25	9.23	20.8
2017-04-28	10.7	24.8		2017-04-25	8.55	19.9
2017-04-28	10.47	23.2		2017-04-26	8.4	18.8
2017-04-28	10.17	21.6		2017-04-26	8.3	18
2017-04-29	9.9	20.1		2017-04-26	8.52	17.5
2017-04-29	9.63	18.8		2017-04-26	9.34	18.9
2017-04-29	9.63	18.8		2017-04-26	9.92	22.9
2017-04-29	10.07	21.7		2017-04-26	10.11	23.6
2017-04-29	10.66	25.2		2017-04-26	9.92	20.3
2017-04-29	10.77	26.1		2017-04-26	9.48	18.2
2017-04-29	10.54	24.6		2017-04-27	9.04	16.3
2017-04-29	10.24	22.9		2017-04-27	8.62	14.8
2017-04-30	9.97	21.5		2017-04-27	8.7	14.3
2017-04-30	9.71	20.2		2017-04-27	8.15	17.7
2017-04-30	9.73	20		2017-04-27	9.35	21.8
2017-04-30	10.22	22.7		2017-04-27	9.22	21
2017-04-30	10.61	26.3		2017-04-27	8.08	17.8
2017-04-30	10.67	27.4		2017-04-27	7.98	15.6
2017-04-30	10.31	26		2017-04-28	8.02	14.3
2017-04-30	9.94	24.6		2017-04-28	8.07	13.3
2017-05-01	9.59	23.3		2017-04-28	8.15	13.3
2017-05-01	9.22	22.1		2017-04-28	8.59	16.6
2017-05-01	9.22	21.6		2017-04-28	9.42	21.1
2017-05-01	10.12	24		2017-04-28	9.67	21.4
2017-05-01	10.81	27.3		2017-04-28	9.51	19.2
2017-05-01	10.81	28		2017-04-28	9.24	17.6
2017-05-01	10.66	25.9		2017-04-29	9.01	16.1
2017-05-01	10.34	23.7		2017-04-29	8.71	14.8
2017-05-02	10.03	22		2017-04-29	8.91	14.6
2017-05-02	9.75	20.6		2017-04-29	9.51	18.6
2017-05-02	9.89	20.4		2017-04-29	9.91	22.9
2017-05-02	10.56	22.5		2017-04-29	10.4	23.8
2017-05-02	10.8	25.5		2017-04-29	10.23	22
2017-05-02	10.77	26.6		2017-04-29	9.98	20.2
2017-05-02	10.5	25.1		2017-04-30	9.67	18.5
2017-05-02	10.16	23.3		2017-04-30	9.44	16.9
2017-05-03	9.86	21.7		2017-04-30	9.39	16.7
2017-05-03	9.58	20.3		2017-04-30	9.79	20.1
2017-05-03	9.74	20.2		2017-04-30	9.69	24.7
2017-05-03	10.56	23.3		2017-04-30	10.01	25.6
2017-05-03	10.73	27.2		2017-04-30	10.11	23.7
2017-05-03	10.67	28.3		2017-04-30	9.84	22.1
2017-05-03	10.39	26.6		2017-05-01	9.52	20.8
2017-05-03	10.01	24.5		2017-05-01	9.26	19.4
2017-05-04	9.67	22.9		2017-05-01	9.31	18.8
2017-05-04	9.35	21.6		2017-05-01	10.06	22
2017-05-04	9.39	21.4		2017-05-01	10.63	25.8
2017-05-04	9.84	24.2		2017-05-01	10.6	26.6
2017-05-04	10.36	27		2017-05-01	10.41	23.5
2017-05-04	10.35	27.2		2017-05-01	10.05	20.7
2017-05-04	9.92	25.9		2017-05-02	9.77	18.9
2017-05-04	9.54	24.7		2017-05-02	9.54	17.4
2017-05-05	9.11	23.7		2017-05-02	9.6	17
2017-05-05	8.45	22.6		2017-05-02	10.11	20.1
2017-05-05	8.89	22.6		2017-05-02	10.44	24
2017-05-05	9.65	25.1		2017-05-02	10.4	25.3
2017-05-05	10.34	27.3		2017-05-02	10.08	23.3
2017-05-05	10.48	26.4		2017-05-02	9.76	20.9
2017-05-05	10.19	25.3		2017-05-03	9.51	19
2017-05-05	9.84	24.4		2017-05-03	9.33	17.5
2017-05-06	9.52	23.3		2017-05-03	9.38	17.2
2017-05-06	9.15	21.6		2017-05-03	9.93	21.4
2017-05-06	9.31	21.2		2017-05-03	10.05	26.3
2017-05-09	9.41	20.5		2017-05-03	10.35	27.6
2017-05-09	8.87	20.1		2017-05-03	10.12	25.1
2017-05-09	8.36	19.6		2017-05-03	9.72	22.5
2017-05-09	8.28	19.2		2017-05-04	9.45	20.7
2017-05-10	8.26	18.8		2017-05-04	9.24	19.1
2017-05-10	8.23	18.5		2017-05-04	9.32	18.8
2017-05-10	8.31	18.3		2017-05-04	9.75	22.5
2017-05-10	8.97	18.9		2017-05-04	10.2	25.7
2017-05-10	9.67	20.3		2017-05-04	10.36	25.7
2017-05-10	9.89	21.4		2017-05-04	10.07	23.8
2017-05-10	9.76	20.9		2017-05-04	9.69	22.4
2017-05-10	9.53	19.9		2017-05-05	9.45	21.4
2017-05-11	9.29	19.2		2017-05-05	9.22	20.2
2017-05-11	8.85	18.5		2017-05-05	9.31	20.1
2017-05-11	9.06	18.5		2017-05-05	9.87	23.6
2017-05-11	10.09	21.1		2017-05-05	10.43	26.4
2017-05-11	10.72	24.4		2017-05-05	10.6	24.8
2017-05-11	11.02	26.1		2017-05-05	10.23	23.6
2017-05-11	10.62	25.2		2017-05-05	9.82	22.5
2017-05-11	10.3	23.9		2017-05-06	9.54	21.3
2017-05-12	10.09	22.8		2017-05-06	9.34	19
2017-05-12	9.88	22		2017-05-06	9.46	18.4
2017-05-12	9.79	21.5		2017-05-06	10.11	21.5
2017-05-12	9.91	21.4		2017-05-06	10.55	24.6
2017-05-12	10.04	21.7		2017-05-06	10.65	24.6
2017-05-12	10.1	22		2017-05-06	10.49	21.3
2017-05-12	9.83	21.6		2017-05-06	10.07	19.3
2017-05-12	9.7	20.9		2017-05-07	9.78	17.7
2017-05-13	9.52	20.2		2017-05-07	9.55	16.2
2017-05-13	9.33	19.5		2017-05-07	9.62	16.1
2017-05-13	9.62	19.7		2017-05-07	10.05	20
2017-05-13	10.32	22.8		2017-05-07	10.47	23.9
2017-05-13	10.92	26.3		2017-05-07	10.7	24.1
2017-05-13	11.09	27.1		2017-05-07	10.42	21.5
2017-05-13	10.59	25.4		2017-05-07	10	19.1
2017-05-13	10.33	23.6		2017-05-08	9.71	17.4
2017-05-14	10.15	22		2017-05-08	9.45	15.9
2017-05-14	9.97	20.6		2017-05-08	9.62	16
2017-05-14	10.21	20.6		2017-05-08	10.14	19.7
2017-05-14	10.97	23.5		2017-05-08	10.53	23.5
2017-05-14	11.51	26.6		2017-05-08	10.45	23.9
2017-05-14	11.28	27.1		2017-05-08	9.91	22.2
2017-05-14	11.08	24.7		2017-05-08	9.51	20.9
2017-05-14	10.9	22.6		2017-05-09	9.13	19.7
2017-05-15	10.65	20.9		2017-05-09	8.65	18.7
2017-05-15	10.42	19.5		2017-05-09	8.52	18
2017-05-15	10.58	19.5		2017-05-09	9.14	18.1
2017-05-15	11.29	21.8		2017-05-09	9.63	19.5
2017-05-15	11.51	25.3		2017-05-09	9.48	18.8
2017-05-15	11.34	26.4		2017-05-09	9.05	18.1
2017-05-15	11.02	24.5		2017-05-09	8.47	17.6
2017-05-15	10.75	22.8		2017-05-10	8.17	17.2
2017-05-16	10.5	21.4		2017-05-10	8.09	16.9
2017-05-16	10.27	20.2		2017-05-10	8.11	16.7
2017-05-16	10.45	20		2017-05-10	8.47	17.6
2017-05-16	11.16	22.4		2017-05-10	9.03	19.8
2017-05-16	11.34	24.5		2017-05-10	9.35	21.3
2017-05-16	11.28	24.5		2017-05-10	9.25	19.9
2017-05-16	10.91	23.5		2017-05-10	8.72	18.5
2017-05-16	10.66	22.2		2017-05-11	8.35	17.6
2017-05-17	10.4	21.1		2017-05-11	8.16	16.7
2017-05-17	10.13	20.1		2017-05-11	8.43	16.7
2017-05-17	10.31	20.2		2017-05-11	9.24	20.6
2017-05-17	11.12	23.1		2017-05-11	10.15	24.9
2017-05-17	11.21	26.8		2017-05-11	10.54	26.6
2017-05-17	11.13	28.2		2017-05-11	10.3	24.9
2017-05-17	10.84	26.8		2017-05-11	9.88	23.2
2017-05-17	10.46	25		2017-05-12	9.5	21.7
2017-05-18	10.1	23.5		2017-05-12	9.14	20.7
2017-05-18	9.79	22.3		2017-05-12	8.75	20.2
2017-05-18	10.01	22.3		2017-05-12	9.23	20.1
2017-05-18	10.87	25.1		2017-05-12	9.88	20
2017-05-18	11.17	30.5		2017-05-15	10.12	22.6
2017-05-18	10.89	36.9		2017-05-15	9.87	20.7
2017-05-18	10.7	28.5		2017-05-16	9.65	19.2
2017-05-18	10.68	22		2017-05-16	9.46	17.9
2017-05-19	10.56	18.2		2017-05-16	9.44	17.2
2017-05-19	10.42	15.8		2017-05-16	10.1	19.3
2017-05-19	10.65	19.5		2017-05-16	10.91	23.1
2017-05-19	10.59	33.5		2017-05-16	11.05	23.4
2017-05-19	9.1	22.9		2017-05-16	11.03	22.5
2017-05-19	9.8	24.9		2017-05-16	10.8	21
2017-05-19	9.8	24.1		2017-05-17	10.53	19.9
2017-05-19	9.67	23		2017-05-17	10.25	18.6
2017-05-20	9.53	21.9		2017-05-17	10.17	17.7
2017-05-20	9.42	20.9		2017-05-17	10.96	20.2
2017-05-20	9.51	21		2017-05-17	11	25.1
2017-05-20	10.03	23.6		2017-05-17	10.86	27.6
2017-05-20	10.67	26.6		2017-05-17	10.83	26.5
2017-05-20	10.9	28.1		2017-05-17	10.56	24.2
2017-05-20	10.8	26.7		2017-05-18	10.25	22.4
2017-05-20	10.59	25.2		2017-05-18	10.01	20.9
2017-05-21	10.31	24.1		2017-05-18	10.01	19.8
2017-05-21	10.16	23		2017-05-18	10.91	22.4
2017-05-21	10.09	22.9		2017-05-18	10.84	26.7
2017-05-21	10.47	25.4		2017-05-18	10.75	28.6
2017-05-21	10.37	27.7		2017-05-18	10.75	27
2017-05-21	10.65	28.6		2017-05-18	10.51	24.6
2017-05-21	10.43	27.3		2017-05-19	10.2	22.9
2017-05-21	10.13	25.8		2017-05-19	9.91	21.1
2017-05-22	9.89	24.5		2017-05-19	9.92	20
2017-05-22	9.7	23.3		2017-05-19	10.88	22.6
2017-05-22	9.77	23.3		2017-05-19	10.84	27.1
2017-05-22	10.12	26		2017-05-19	10.75	28.6
2017-05-22	10.35	29.3		2017-05-19	10.78	26.7
2017-05-22	10.48	30.2		2017-05-19	10.55	24
2017-05-22	10.2	28.8		2017-05-20	10.25	22.2
2017-05-22	9.88	27		2017-05-20	9.99	20.7
2017-05-23	9.66	25.5		2017-05-20	9.97	19.7
2017-05-23	9.5	24.3		2017-05-20	10.84	22.4
2017-05-23	9.54	23.9		2017-05-20	10.86	26.9
2017-05-23	9.8	25.8		2017-05-20	10.77	29.6
2017-05-23	10.16	27.9		2017-05-20	10.78	27.1
2017-05-23	10.16	28.2		2017-05-20	10.58	24.3
2017-05-23	9.92	27.1		2017-05-21	10.28	22.9
2017-05-23	9.73	26		2017-05-21	10.01	21.5
2017-05-24	9.57	24.9		2017-05-21	10.02	20.6
2017-05-24	9.45	24.1		2017-05-21	10.91	23.3
2017-05-24	9.4	23.6		2017-05-21	10.84	27.1
2017-05-24	9.65	24.6		2017-05-21	10.74	29.1
2017-05-24	9.89	26.5		2017-05-21	10.66	27.6
2017-05-24	9.73	27.8		2017-05-21	10.42	25.5
2017-05-24	9.41	26.8		2017-05-22	10.09	23.7
2017-05-24	9.25	25.5		2017-05-22	9.79	22.1
2017-05-25	9.11	24.5		2017-05-22	9.79	20.9
2017-05-25	8.97	23.6		2017-05-22	10.76	23.7
2017-05-25	9.07	23.2		2017-05-22	10.63	28.4
2017-05-25	9.68	26.1		2017-05-22	10.45	30.2
2017-05-25	10.34	29.6		2017-05-22	10.51	28.2
2017-05-25	10.46	30.2		2017-05-22	9.98	25.2
2017-05-25	10.19	28		2017-05-23	9.5	23.6
2017-05-25	9.94	25.3		2017-05-23	9.05	22.1
2017-05-26	9.78	23.2		2017-05-23	9.07	21.1
2017-05-26	9.64	21.6		2017-05-23	10.24	22.9
2017-05-26	9.65	21.1		2017-05-23	10.51	26.1
2017-05-26	9.77	23.4		2017-05-23	10.13	27.3
2017-05-26	10.05	26.5		2017-05-23	9.71	26.2
2017-05-26	10.05	27.5		2017-05-23	9.22	24.9
2017-05-26	9.72	25.8		2017-05-24	8.6	23.6
2017-05-26	9.46	24.1		2017-05-24	8.22	22.6
2017-05-27	9.19	22.6		2017-05-24	8.25	22
2017-05-27	8.91	21.5		2017-05-24	9.09	22.2
2017-05-27	9.07	21.5		2017-05-24	10.3	25.9
2017-05-27	9.57	24.4		2017-05-24	9.66	29.7
2017-05-27	10.02	35.9		2017-05-24	8.44	27.3
2017-05-27	6.87	39.5		2017-05-24	7.6	20.2
2017-05-27	7.71	26.1		2017-05-25	7.6	18.2
2017-05-27	8.25	20.5		2017-05-25	7.82	17.1
2017-05-28	7.68	17.8		2017-05-25	7.83	17.2
2017-05-28	7.98	16.4		2017-05-25	8.57	20
2017-05-28	7.97	24		2017-05-25	9.54	24.4
2017-05-28	7.32	35.7		2017-05-25	10.4	26.3
2017-05-28	6.06	43.3		2017-05-25	10.76	24.7
2017-05-28	6.71	38.9		2017-05-25	10.52	21.5
2017-05-28	6.83	28.1		2017-05-26	10.29	19
2017-05-28	6.89	22.8		2017-05-26	10.06	17.5
2017-05-29	7.69	20.4		2017-05-26	10.02	16.4
2017-05-29	7.94	19.3		2017-05-26	10.55	19.1
2017-05-29	7.44	27.1		2017-05-26	10.81	22.6
2017-05-29	6.71	40.6		2017-05-26	10.78	25.4
2017-05-29	6.21	40.9		2017-05-26	10.75	23.9
2017-05-29	9.92	27.7		2017-05-26	10.54	21.9
2017-05-29	9.95	27.2		2017-05-27	10.35	20
2017-05-29	9.67	26.1		2017-05-27	10.16	18.7
2017-05-30	9.44	25		2017-05-27	10.12	17.8
2017-05-30	9.18	24		2017-05-27	9.95	20.7
2017-05-30	9.49	24.1		2017-05-27	10.09	25.4
2017-05-30	9.29	26		2017-05-27	10.31	28
2017-05-30	9.54	28		2017-05-27	10.3	26.8
2017-05-30	9.7	28.4		2017-05-27	9.92	24.4
2017-05-30	9.6	27.6		2017-05-28	9.56	22.4
2017-05-30	9.39	26.4		2017-05-28	9.32	20.9
2017-05-31	9.28	25.3		2017-05-28	9.31	19.9
2017-05-31	9.15	24.4		2017-05-28	10.19	21.9
2017-05-31	9.17	24.2		2017-05-28	10.58	26.3
2017-05-31	9.48	25.7		2017-05-28	10.47	28.9
2017-05-31	9.91	28.2		2017-05-28	10.39	27.6
2017-05-31	9.99	28.6		2017-05-28	9.92	25.2
2017-05-31	9.84	27.5		2017-05-29	9.62	23.6
2017-05-31	9.71	26.4		2017-05-29	9.41	22.3
2017-06-01	9.61	25.5		2017-05-29	9.39	21.5
2017-06-01	9.5	24.8		2017-05-29	10.32	24.1
2017-06-01	9.51	24.7		2017-05-29	10.52	28.9
2017-06-01	9.78	27.1		2017-05-29	10.48	30.8
2017-06-01	10.12	29.7		2017-05-29	10.33	29.2
2017-06-01	10.44	30.7		2017-05-29	9.92	27.1
2017-06-01	10.33	28.9		2017-05-30	9.64	25.4
2017-06-01	10.14	27		2017-05-30	9.45	23.7
2017-06-02	9.98	25.2		2017-05-30	9.62	22.7
2017-06-02	9.85	23.8		2017-05-30	10.47	25.3
2017-06-02	9.94	23.8		2017-05-30	10.4	26.6
2017-06-02	10.5	26.3		2017-05-30	10.53	28.5
2017-06-02	11.01	29.2		2017-05-30	10.51	27.5
2017-06-02	10.87	29.9		2017-05-30	10.15	25.8
2017-06-02	10.64	28.1		2017-05-31	9.8	24.4
2017-06-02	10.44	26.1		2017-05-31	9.5	23.2
2017-06-03	10.23	24.7		2017-05-31	9.39	22.4
2017-06-03	10.01	23.7		2017-05-31	10.11	23.7
2017-06-03	10.06	23.6		2017-05-31	10.42	26.6
2017-06-03	10.12	25.7		2017-05-31	10.5	28.5
2017-06-03	10.92	28.5		2017-05-31	9.75	26.8
2017-06-03	11.04	29.2		2017-05-31	9.44	25.4
2017-06-03	10.97	27.7		2017-06-01	9.09	24.2
2017-06-03	10.79	25.8		2017-06-01	8.66	23.5
2017-06-04	10.55	24.3		2017-06-01	8.62	22.9
2017-06-04	10.31	23.1		2017-06-01	10.09	25.2
2017-06-04	10.4	23.1		2017-06-01	10.48	29.5
2017-06-04	10.91	25.5		2017-06-01	10.23	30.7
2017-06-04	10.97	28.5		2017-06-01	9.98	28.6
2017-06-04	10.96	29.3		2017-06-01	9.89	25.6
2017-06-04	10.99	27.7		2017-06-02	9.59	23.2
2017-06-04	10.8	25.9		2017-06-02	9.37	21.3
2017-06-05	10.55	24.4		2017-06-02	9.42	20.3
2017-06-05	10.27	23		2017-06-02	10.53	23.4
2017-06-05	10.39	23		2017-06-02	10.28	27.7
2017-06-05	10.87	25.4		2017-06-02	10.42	29.8
2017-06-05	10.77	28.9		2017-06-02	10.43	27.5
2017-06-05	10.76	29.2		2017-06-02	10.02	24.3
2017-06-05	10.47	27.3		2017-06-03	9.63	22.3
2017-06-05	10.15	25.5		2017-06-03	9.24	21.2
2017-06-06	9.92	24		2017-06-03	9.32	20.5
2017-06-06	9.72	22.9		2017-06-03	10.32	23.1
2017-06-06	9.72	22.7		2017-06-03	10.6	27.1
2017-06-06	9.75	23.4		2017-06-03	10.53	28.1
2017-06-06	9.76	23.8		2017-06-03	10.5	25.8
2017-06-06	9.54	23.6		2017-06-03	10.1	22.7
2017-06-06	9.16	22.8		2017-06-04	9.66	21.4
2017-06-06	9.07	22		2017-06-04	9.25	19.9
2017-06-07	8.98	21.3		2017-06-04	9.33	19
2017-06-07	8.89	20.8		2017-06-04	10.53	23.3
2017-06-07	8.8	20.7		2017-06-04	10.53	27.5
2017-06-07	9.12	21.7		2017-06-04	10.5	29.9
2017-06-07	9.28	23		2017-06-04	10.45	25.6
2017-06-07	9.16	23.7		2017-06-04	9.99	21.8
2017-06-07	8.7	23.2		2017-06-05	9.56	20.5
2017-06-07	8.54	22.3		2017-06-05	9.14	18.7
2017-06-08	8.44	21.5		2017-06-05	9.15	18.5
2017-06-08	8.35	20.6		2017-06-05	10.57	24.7
2017-06-08	8.86	20.8		2017-06-05	10.5	25.9
2017-06-08	9.65	22.9		2017-06-07	9.27	21.9
2017-06-08	7.79	36.6		2017-06-07	8.92	21
2017-06-08	8.83	25.9		2017-06-07	8.4	20
2017-06-08	7.21	21.1		2017-06-08	8.08	19
2017-06-09	6.77	19.1		2017-06-08	7.98	18.3
2017-06-09	6.1	18.3		2017-06-08	9.27	19.3
2017-06-09	8.72	25.1		2017-06-08	9.96	22.8
2017-06-09	7.84	33.6		2017-06-08	10.76	27.2
2017-06-09	9.65	25		2017-06-08	10.86	27.6
2017-06-09	10.24	26.8		2017-06-08	10.66	25.6
2017-06-09	10.35	26.1		2017-06-08	10.31	24
2017-06-09	10.14	24.8		2017-06-09	9.97	22.7
2017-06-10	9.97	23.6		2017-06-09	9.72	21.6
2017-06-10	9.82	22.7		2017-06-09	10.31	22.4
2017-06-10	9.87	22.6		2017-06-09	10.94	26.2
2017-06-10	9.68	23.3		2017-06-09	10.8	30.1
2017-06-10	9.8	25.7		2017-06-09	10.68	29.1
2017-06-10	9.85	26.6		2017-06-09	10.6	26.1
2017-06-10	9.66	25.8		2017-06-09	10.21	24.3
2017-06-10	9.52	24.3		2017-06-10	9.86	22.7
2017-06-11	9.41	23.1		2017-06-10	9.54	21.7
2017-06-11	9.33	22.1		2017-06-10	10.03	22.1
2017-06-11	9.4	21.9		2017-06-10	10.27	23.4
2017-06-11	9.7	24.3		2017-06-10	10.78	26.7
2017-06-11	10.16	28.3		2017-06-10	10.71	26.8
2017-06-11	10.55	29.6		2017-06-10	10.42	24.5
2017-06-11	10.45	27.7		2017-06-10	9.98	22.5
2017-06-11	10.26	25.8		2017-06-11	9.63	21.1
2017-06-12	10.1	24.5		2017-06-11	9.25	20
2017-06-12	9.97	23.4		2017-06-11	9.96	20.6
2017-06-12	10.01	23.4		2017-06-11	10.76	25.3
2017-06-12	10.32	25.2		2017-06-11	10.75	29.8
2017-06-12	10.79	27.7		2017-06-11	10.72	29.8
2017-06-12	10.99	28.1		2017-06-11	10.5	25.8
2017-06-12	10.95	26.7		2017-06-11	10.07	23.7
2017-06-12	10.75	25		2017-06-12	9.68	22.2
2017-06-13	10.54	23.8		2017-06-12	9.38	21
2017-06-13	10.35	22.9		2017-06-12	10.25	22.1
2017-06-13	10.34	22.9		2017-06-12	10.79	25.2
2017-06-13	10.68	25.4		2017-06-12	10.79	27.9
2017-06-13	10.96	28		2017-06-12	10.8	26.8
2017-06-13	10.98	27.8		2017-06-12	10.66	24.3
2017-06-13	10.72	26.4		2017-06-12	10.3	22
2017-06-13	10.47	25.1		2017-06-13	9.87	21
2017-06-14	10.26	24.1		2017-06-13	9.56	20.1
2017-06-14	10.08	23.2		2017-06-13	10.36	21.4
2017-06-14	10.12	23.1		2017-06-13	10.65	26.2
2017-06-14	10.37	25.7		2017-06-13	10.6	27.2
2017-06-14	11.03	28.8		2017-06-13	12.05	24.8
2017-06-14	11.08	29.6		2017-06-13	5.92	19.8
2017-06-14	10.97	28.3		2017-06-13	9.3	17.8
2017-06-14	10.74	26.5		2017-06-14	9.4	16.1
2017-06-15	10.5	25.1		2017-06-14	9.49	16.5
2017-06-15	10.28	23.8		2017-06-14	10.72	33
2017-06-15	10.34	23.7		2017-06-14	10.83	24.2
2017-06-15	10.78	26.1		2017-06-14	10.61	21.7
2017-06-15	11.26	29.8		2017-06-15	10.37	20
2017-06-15	11.18	31.1		2017-06-15	10.18	19.2
2017-06-15	11.03	29.7		2017-06-15	10.87	25.7
2017-06-15	10.79	28.1		2017-06-15	10.94	34.2
2017-06-16	10.53	26.7		2017-06-15	10.74	35.8
2017-06-16	10.27	25.5		2017-06-15	10.6	26.1
2017-06-16	10.35	25.5		2017-06-15	10.86	22.7
2017-06-16	10.82	28		2017-06-16	10.75	20.2
2017-06-16	11.2	31.4		2017-06-16	10.51	18.8
2017-06-16	11.01	32.5		2017-06-16	10.69	25.4
2017-06-16	10.78	30.6		2017-06-16	7.13	31.9
2017-06-16	10.43	28.4		2017-06-16	10.74	33
2017-06-17	10.12	26.7		2017-06-16	10.09	28.1
2017-06-17	9.86	25.3		2017-06-16	9.66	26
2017-06-17	9.88	25.3		2017-06-16	9.36	24.2
2017-06-17	10.35	28		2017-06-17	9.13	22.8
2017-06-17	11.02	31.5		2017-06-17	8.95	21.7
2017-06-17	10.99	32.7		2017-06-17	9.44	22.8
2017-06-17	10.83	31.2		2017-06-17	10.12	27.2
2017-06-17	10.56	29.2		2017-06-17	10.86	31.1
2017-06-18	10.28	27.6		2017-06-17	10.89	31.6
2017-06-18	10.02	26.3		2017-06-17	10.73	29.1
2017-06-18	10.09	26.2		2017-06-17	10.45	26.6
2017-06-18	10.8	28.7		2017-06-18	10.17	25.1
2017-06-18	11.24	32		2017-06-18	9.94	23.7
2017-06-18	11.07	33.2		2017-06-18	10.33	24.6
2017-06-18	11.02	31.6		2017-06-18	10.94	28.2
2017-06-18	10.7	29.6		2017-06-18	10.87	32
2017-06-19	10.43	28.1		2017-06-18	10.83	32.5
2017-06-19	10.24	26.8		2017-06-18	10.73	29.7
2017-06-19	10.24	26.9		2017-06-18	10.46	27.3
2017-06-19	10.88	29.8		2017-06-19	10.17	25.8
2017-06-19	11.26	30.4		2017-06-19	9.92	24.6
2017-06-19	16.03	39.9		2017-06-19	10.39	25.5
2017-06-19	9.69	31.5		2017-06-19	10.84	29.7
2017-06-19	9.4	26.6		2017-06-19	10.78	32.5
2017-06-20	9.19	24		2017-06-19	10.59	32.3
2017-06-20	9.17	22.2		2017-06-19	10.47	30.2
2017-06-20	9.01	27.3		2017-06-19	10.11	28.4
2017-06-20	8.58	35.9		2017-06-20	9.79	26.8
2017-06-20	7.29	34		2017-06-20	9.53	25.5
2017-06-20	9.23	24.8		2017-06-20	10.03	25.5
2017-06-20	9.08	24.4		2017-06-20	10.67	27.1
2017-06-20	8.75	24		2017-06-20	10.85	28.5
2017-06-21	8.45	23.6		2017-06-20	10.77	27.3
2017-06-21	8.25	23.1		2017-06-20	10.39	25.8
2017-06-21	8.89	23.7		2017-06-20	10.07	24.7
2017-06-21	9.83	26.5		2017-06-21	9.76	24
2017-06-21	10.26	28.6		2017-06-21	9.47	23
2017-06-21	10.63	29.4		2017-06-21	9.88	24.2
2017-06-21	10.53	28.2		2017-06-21	10.81	28.4
2017-06-21	10.44	27		2017-06-21	10.86	31.3
2017-06-22	10.36	26.1		2017-06-21	10.8	29.7
2017-06-22	10.28	25.2		2017-06-21	10.49	27.1
2017-06-22	10.32	25.6		2017-06-21	10.07	25.6
2017-06-22	10.42	28.2		2017-06-22	9.76	24.5
2017-06-22	10.38	30.4		2017-06-22	9.5	23.4
2017-06-22	9.87	31		2017-06-22	9.79	24.5
2017-06-22	9.69	30.1		2017-06-22	10.45	29.1
2017-06-22	9.41	28.6		2017-06-22	10.44	32.3
2017-06-23	9.17	27.6		2017-06-22	10.37	31.6
2017-06-23	8.89	26.6		2017-06-22	8.91	25.2
2017-06-23	9.07	26.7		2017-06-22	1.56	24.2
2017-06-23	9.76	29.4		2017-06-23	4.97	22.5
2017-06-23	10.45	32.7		2017-06-23	6.76	20.8
2017-06-23	10.63	33.4		2017-06-23	6.34	30.3
2017-06-23	10.5	31.7		2017-06-23	6.67	41.5
2017-06-23	10.22	29.8		2017-06-23	6.49	43.4
2017-06-24	10.01	28.5		2017-06-23	7.35	34.4
2017-06-24	9.83	27.3		2017-06-23	8.25	27.3
2017-06-24	9.83	27		2017-06-23	7.97	25.6
2017-06-24	10.27	29		2017-06-24	8.06	23.8
2017-06-24	10.86	32.2		2017-06-24	8.31	22.2
2017-06-24	10.92	31.9		2017-06-24	7.6	26.2
2017-06-24	10.53	30.4		2017-06-24	7.42	34.1
2017-06-24	10.27	29		2017-06-24	7.01	34.4
2017-06-25	10.07	27.9		2017-06-24	7.6	30.4
2017-06-25	9.86	27		2017-06-24	8.25	23.6
2017-06-25	9.86	26.9		2017-06-24	8.48	22
2017-06-25	10.53	29.1		2017-06-25	8.37	21.3
2017-06-25	10.91	31		2017-06-25	8.31	21.1
2017-06-25	10.96	31.4		2017-06-25	7.47	27.7
2017-06-25	10.77	28.2		2017-06-25	8.42	38.6
2017-06-25	10.63	27.2		2017-06-25	9.78	29.2
2017-06-26	10.52	26.6		2017-06-25	9.97	28.2
2017-06-26	10.43	26		2017-06-25	9.2	24
2017-06-26	9.64	25.6		2017-06-25	8.49	23.6
2017-06-26	7.64	25.9		2017-06-26	8.16	23.3
2017-06-26	9.76	28.5		2017-06-26	8	23.1
2017-06-26	7.73	28.8		2017-06-26	8.15	23.3
2017-06-26	9.93	27.4		2017-06-26	8.31	24.1
2017-06-26	9.95	26.5		2017-06-26	8.61	27.5
2017-06-27	9.94	25.8		2017-06-26	9.19	27.4
2017-06-27	9.87	25.3		2017-06-26	9.31	26
2017-06-27	9.91	25.2		2017-06-26	9.14	25.1
2017-06-27	10.04	26.7		2017-06-27	8.88	24.5
2017-06-27	9.45	28.9		2017-06-27	8.69	24
2017-06-27	9.76	30		2017-06-27	8.58	24.2
2017-06-27	9.88	29		2017-06-27	8.7	26.4
2017-06-27	9.7	27.7		2017-06-27	10.5	29.1
2017-06-28	9.62	26.6		2017-06-27	10.62	29.4
2017-06-28	9.53	25.7		2017-06-27	10.48	28.2
2017-06-28	9.48	25.7		2017-06-27	10.12	26.6
2017-06-28	9.29	28.1		2017-06-28	9.81	25.5
2017-06-28	10.05	33.7		2017-06-28	9.58	24.6
2017-06-28	12.4	34.2		2017-06-28	9.77	25.3
2017-06-28	9.75	27.7		2017-06-28	10.32	28.9
2017-06-28	8.65	25.6		2017-06-28	10.41	32.5
2017-06-29	8.44	24		2017-06-28	10.48	32.3
2017-06-29	8.35	23.5		2017-06-28	10.43	30
2017-06-29	8.28	26.1		2017-06-28	10.11	28.6
2017-06-29	8.49	31		2017-06-29	9.77	27.5
2017-07-01	9.16	26		2017-06-29	9.48	26.5
2017-07-01	9.31	27.1		2017-06-29	9.51	26.7
2017-07-01	9.01	27		2017-06-29	10.03	27.9
2017-07-01	8.69	26.7		2017-06-29	10.14	30.1
2017-07-02	8.42	26.2		2017-06-29	10.25	30.5
2017-07-02	8.2	25.7		2017-06-29	10.31	28.6
2017-07-02	8.27	25.7		2017-06-29	10.07	27.2
2017-07-02	8.83	26.8		2017-06-30	9.81	26.1
2017-07-02	9.39	28.9		2017-06-30	9.48	25.5
2017-07-02	9.33	28.8		2017-06-30	9.63	26
2017-07-02	9.27	28.5		2017-06-30	9.99	28.9
2017-07-02	9.08	27.7		2017-06-30	10.35	32.3
2017-07-03	8.87	27.1		2017-06-30	10.19	32
2017-07-03	8.61	26.5		2017-06-30	9.93	30.1
2017-07-03	8.63	26.4		2017-06-30	9.63	28.8
2017-07-03	8.96	27.2		2017-07-01	9.29	28
2017-07-03	9.27	29.2		2017-07-01	8.98	27.4
2017-07-03	9.19	29.1		2017-07-01	8.83	27.1
2017-07-03	9.06	28.4		2017-07-01	8.94	27.9
2017-07-03	8.87	27.7		2017-07-01	9.76	28.5
2017-07-04	8.71	27.2		2017-07-01	10.63	29.2
2017-07-04	8.47	26.8		2017-07-01	10.37	27.3
2017-07-04	8.48	26.7		2017-07-01	9.96	26.4
2017-07-04	9.13	28		2017-07-02	9.61	25.2
2017-07-04	9.31	29.1		2017-07-02	9.24	25
2017-07-04	9.45	29.9		2017-07-02	9.38	26.1
2017-07-04	9.34	29.5		2017-07-02	10.3	30.2
2017-07-04	9.12	28.6		2017-07-02	10.52	28.7
2017-07-05	8.92	27.8		2017-07-02	10.44	28.4
2017-07-05	8.69	27.1		2017-07-02	10.41	27.1
2017-07-05	8.79	27.1		2017-07-02	10.14	26.7
2017-07-05	9.31	29.3		2017-07-03	9.86	26.5
2017-07-05	9.88	32.5		2017-07-03	9.48	26.1
2017-07-05	9.87	33.8		2017-07-03	9.55	27.6
2017-07-05	9.78	32.4		2017-07-03	10.15	29.9
2017-07-05	9.64	30.8		2017-07-03	9.59	31.4
2017-07-06	9.43	29.5		2017-07-03	9.57	27.3
2017-07-06	9.27	28.7		2017-07-03	9.6	26.9
2017-07-06	9.23	28.5		2017-07-03	9.66	26.3
2017-07-06	9.41	30.1		2017-07-04	9.48	25.9
2017-07-06	9.89	32.5		2017-07-04	9.3	25.7
2017-07-06	10.01	31.5		2017-07-04	9.18	26.2
2017-07-06	9.89	30.1		2017-07-04	9.17	29.5
2017-07-06	9.74	29.1		2017-07-04	9.58	30.6
2017-07-07	9.57	28.3		2017-07-04	10.34	30.8
2017-07-07	9.35	27.6		2017-07-04	10	29.5
2017-07-07	9.29	27.4		2017-07-04	9.59	28.3
2017-07-07	9.72	27.8		2017-07-05	9.24	27.4
2017-07-07	9.14	26.9		2017-07-05	8.89	26.7
2017-07-07	9.41	29.3		2017-07-05	9.19	27.6
2017-07-07	9.4	26.9		2017-07-05	9.97	32
2017-07-07	9.39	25.7		2017-07-05	10.29	35.7
2017-07-08	9.34	25.2		2017-07-05	10.08	35.8
2017-07-08	9.25	25.1		2017-07-05	9.99	32.6
2017-07-08	8.36	27.3		2017-07-05	9.65	30.4
2017-07-08	7.83	21.5		2017-07-06	9.31	28.9
2017-07-08	8.74	23.1		2017-07-06	8.94	28.1
2017-07-08	9.34	24.9		2017-07-06	9.2	28.9
2017-07-08	9.31	25.3		2017-07-06	9.91	32.4
2017-07-08	9.18	25.2		2017-07-06	10.51	32.3
2017-07-09	9.03	25.2		2017-07-06	10.49	30
2017-07-09	8.81	25.1		2017-07-06	9.99	28.9
2017-07-09	8.88	25.5		2017-07-06	9.67	27.9
2017-07-09	9.45	28.5		2017-07-07	9.32	26.8
2017-07-09	10.05	32.2		2017-07-07	9	26
2017-07-09	10.31	32.2		2017-07-07	8.99	26.4
2017-07-09	10.56	30.8		2017-07-07	10.03	27.1
2017-07-09	10.39	29.8		2017-07-07	9.94	27.8
2017-07-10	10.24	28.7		2017-07-07	10.05	28.4
2017-07-10	10.06	28		2017-07-07	9.79	27.7
2017-07-10	10.08	27.9		2017-07-07	9.42	27
2017-07-10	10.58	28.6		2017-07-08	8.92	26.4
2017-07-10	10.32	29		2017-07-08	8.47	26.1
2017-07-10	10.52	29.9		2017-07-08	8.35	26.3
2017-07-10	10.19	29		2017-07-08	8.1	26.3
2017-07-10	9.9	28.2		2017-07-08	8.67	27.2
2017-07-11	9.69	27.5		2017-07-08	8.96	28.5
2017-07-11	9.53	27		2017-07-08	8.39	28
2017-07-11	9.5	26.8		2017-07-08	8.07	27.4
2017-07-11	9.79	28.8		2017-07-09	7.97	27
2017-07-11	10.37	31.6		2017-07-09	7.89	26.7
2017-07-11	10.56	32.7		2017-07-09	7.86	27.6
2017-07-11	10.35	31.8		2017-07-09	8.46	31.9
2017-07-11	10.09	30.5		2017-07-09	9.01	35.1
2017-07-12	9.86	29.4		2017-07-09	9.69	33.8
2017-07-12	9.69	28.5		2017-07-09	9.81	31.7
2017-07-12	9.72	28.4		2017-07-09	9.63	30.3
2017-07-12	9.93	30.5		2017-07-10	9.37	28.9
2017-07-12	10.51	33.1		2017-07-10	9.08	28
2017-07-12	10.54	34		2017-07-10	9.47	28.3
2017-07-12	10.65	32.5		2017-07-10	10	29.6
2017-07-12	10.38	30.9		2017-07-10	10.49	31.2
2017-07-13	10.1	29.6		2017-07-10	10.58	30.8
2017-07-13	9.86	28.6		2017-07-10	10.26	29
2017-07-13	9.82	28.4		2017-07-10	9.87	27.8
2017-07-13	10.22	30.8		2017-07-11	9.54	27
2017-07-13	10.59	33.9		2017-07-11	9.18	26.4
2017-07-13	10.75	34.6		2017-07-11	9.21	26.9
2017-07-13	10.68	32.7		2017-07-11	9.74	30.7
2017-07-13	10.43	31.1		2017-07-11	10.61	34.3
2017-07-14	10.13	29.7		2017-07-11	10.53	34.2
2017-07-14	9.84	28.6		2017-07-11	10.24	32.3
2017-07-14	9.78	28.3		2017-07-11	9.78	30.6
2017-07-14	10.24	30.3		2017-07-12	9.43	29.3
2017-07-14	10.64	33.1		2017-07-12	9.08	28.2
2017-07-14	10.61	32.9		2017-07-12	9.72	28.9
2017-07-14	10.26	30		2017-07-12	10.56	32.9
2017-07-14	10.01	28.8		2017-07-12	10.63	35.8
2017-07-15	9.71	27.9		2017-07-12	10.53	35.6
2017-07-15	9.48	27.4		2017-07-12	10.28	32.9
2017-07-15	9.26	26.9		2017-07-12	9.83	30.9
2017-07-15	9.57	27.6		2017-07-13	9.44	29.4
2017-07-15	10.02	28.3		2017-07-13	9.07	28
2017-07-15	10.37	28.4		2017-07-13	9.82	28.9
2017-07-15	10.24	27.9		2017-07-13	10.37	33.6
2017-07-15	10.01	27.4		2017-07-13	10.23	35.4
2017-07-16	9.78	27		2017-07-13	7.72	37.4
2017-07-16	9.52	26.7		2017-07-14	7.92	37.7
2017-07-16	9.3	26.5		2017-07-14	10.15	38.6
2017-07-16	9.34	26.9		2017-07-14	9.89	28
2017-07-16	9.46	29		2017-07-14	9.51	27.2
2017-07-16	9.75	30.6		2017-07-14	9.16	26.5
2017-07-16	9.69	29.8		2017-07-15	8.74	26.1
2017-07-16	9.38	29		2017-07-15	8.41	25.7
2017-07-17	8.97	28.3		2017-07-15	8.34	25.6
2017-07-17	8.56	27.7		2017-07-15	9.24	27.4
2017-07-17	8.35	27.5		2017-07-15	9.78	28.1
2017-07-17	8.61	28.9		2017-07-15	10.03	28
2017-07-17	9.22	30.9		2017-07-15	9.84	27.5
2017-07-17	9.95	31.6		2017-07-15	9.55	27
2017-07-17	9.92	29.8		2017-07-16	9.23	26.7
2017-07-17	9.71	28.5		2017-07-16	8.93	26.3
2017-07-18	9.47	27.7		2017-07-16	8.87	26.3
2017-07-18	9.22	27		2017-07-16	8.96	27
2017-07-18	9.12	27.1		2017-07-16	8.68	30.7
2017-07-18	9.59	28.5		2017-07-16	9.59	31.3
2017-07-18	9.75	31		2017-07-16	8.98	30.1
2017-07-18	10.24	31.4		2017-07-16	8.15	29.1
2017-07-18	10.34	30.6		2017-07-17	7.82	28.4
2017-07-18	10.18	29.5		2017-07-17	7.69	27.7
2017-07-19	9.9	28.5		2017-07-17	8.01	27.9
2017-07-19	9.56	27.7		2017-07-17	9.19	30.4
2017-07-19	9.39	27.6		2017-07-17	9.83	32.3
2017-07-19	9.94	29.8		2017-07-17	9.96	31.7
2017-07-19	10.26	32.7		2017-07-17	9.5	30
2017-07-19	9.97	33		2017-07-17	8.89	28.6
2017-07-19	9.02	27.2		2017-07-18	8.08	27.8
2017-07-19	8.94	25.9		2017-07-18	7.67	27
2017-07-20	8.49	23.7		2017-07-18	8.14	27.9
2017-07-20	8.31	22.6		2017-07-18	9.03	30
2017-07-20	8.21	23.4		2017-07-18	9.22	32.3
2017-07-20	8.51	26.5		2017-07-18	9.27	32.3
2017-07-20	9.1	30.4		2017-07-18	8.62	31
2017-07-20	9.87	31.7		2017-07-18	7.63	29.7
2017-07-20	10.25	31.2		2017-07-19	7.43	28.6
2017-07-20	10.18	30.3		2017-07-19	7.38	27.7
2017-07-21	9.98	29.6		2017-07-19	7.48	28.4
2017-07-21	9.77	28.9		2017-07-19	7.94	31.4
2017-07-21	9.63	28.9		2017-07-19	8.52	34.6
2017-07-21	9.79	30.4		2017-07-19	9.31	35.4
2017-07-21	10.11	32.8		2017-07-19	9.7	33.5
2017-07-21	10.49	33.7		2017-07-19	9.56	31.8
2017-07-21	10.71	32.9		2017-07-20	9.29	30.6
2017-07-21	10.51	31.8		2017-07-20	8.93	29.5
2017-07-22	10.24	31		2017-07-20	8.79	29.9
2017-07-22	10	30.2		2017-07-20	9.23	33.7
2017-07-22	9.81	29.9		2017-07-20	9.6	36.7
2017-07-22	9.84	31.2		2017-07-20	9.62	36.5
2017-07-22	10.11	33.3		2017-07-20	9.42	34.4
2017-07-22	9.7	33.3		2017-07-20	8.59	32.8
2017-07-22	9.52	32.4		2017-07-21	7.79	31.5
2017-07-22	9.14	31.1		2017-07-21	7.55	30.3
2017-07-23	8.79	30		2017-07-21	7.63	30.7
2017-07-23	8.52	28.9		2017-07-21	8.11	32.7
2017-07-23	8.27	28.3		2017-07-21	8.91	35.5
2017-07-23	8.21	28.5		2017-07-21	9.57	36.1
2017-07-23	8.35	29.2		2017-07-21	9.65	34.3
2017-07-23	8.65	29.7		2017-07-21	9.45	32.8
2017-07-23	8.8	29.6		2017-07-22	9.11	31.6
2017-07-23	8.74	29.2		2017-07-22	8.69	30.6
2017-07-24	8.58	28.7		2017-07-22	8.44	30.7
2017-07-24	8.42	28.3		2017-07-22	8.91	33.1
2017-07-24	8.36	28.4		2017-07-22	9.51	35.3
2017-07-24	8.54	30.2		2017-07-22	9.67	32.8
2017-07-24	8.85	31.4		2017-07-22	9.77	28.8
2017-07-24	8.8	30.8		2017-07-22	9.61	27.3
2017-07-24	8.56	30.3		2017-07-23	9.33	26.1
2017-07-24	8.21	29.6		2017-07-23	8.99	25.4
2017-07-25	7.99	29.1		2017-07-23	8.73	26.8
2017-07-25	7.88	28.8		2017-07-23	9.01	27.9
2017-07-25	7.81	28.5		2017-07-23	9.57	29.9
2017-07-25	7.87	29		2017-07-23	9.76	31.4
2017-07-25	7.94	29.9		2017-07-23	9.89	28.6
2017-07-25	7.97	29.7		2017-07-23	9.78	28.1
2017-07-25	7.9	29		2017-07-24	9.52	27.2
2017-07-25	7.69	28.2		2017-07-24	9.21	26.8
2017-07-26	7.61	27.5		2017-07-24	9.01	29.3
2017-07-26	7.59	26.8		2017-07-24	9.1	33.5
2017-07-26	7.59	26.6		2017-07-24	8.44	29.9
2017-07-26	7.68	28.4		2017-07-24	8.17	28.7
2017-07-26	8.03	30.5		2017-07-24	8.24	27.5
2017-07-26	8.44	31.4		2017-07-24	8.26	26.4
2017-07-26	8.59	30		2017-07-25	7.97	25.6
2017-07-26	8.41	28.4		2017-07-25	7.69	24.3
2017-07-27	8.17	27		2017-07-25	7.62	22
2017-07-27	8	25.8		2017-07-25	7.58	23.1
2017-07-27	7.89	25.4		2017-07-25	7.59	26
2017-07-27	8.13	27.5		2017-07-25	7.72	26.7
2017-07-27	8.89	30.9		2017-07-25	7.73	26.3
2017-07-27	9.41	32.6		2017-07-25	7.66	25.6
2017-07-27	9.51	31.3		2017-07-26	7.54	25.1
2017-07-27	9.28	29.8		2017-07-26	7.5	24.5
2017-07-28	8.95	28.7		2017-07-26	7.51	25.6
2017-07-28	8.53	27.6		2017-07-26	7.54	29.2
2017-07-28	8.06	27.2		2017-07-26	7.61	31.5
2017-07-28	8.09	28.8		2017-07-26	7.93	32
2017-07-28	8.78	33.6		2017-07-26	8.49	29.6
2017-07-28	9.49	32.8		2017-07-26	8.75	27.7
2017-07-28	9.79	31.2		2017-07-27	8.41	26
2017-07-28	9.74	29.3		2017-07-27	7.95	24.5
2017-07-29	9.6	28.7		2017-07-27	7.84	25.2
2017-07-29	9.39	27.7		2017-07-27	7.9	29.7
2017-07-29	9.22	27.2		2017-07-27	8.25	34.1
2017-07-29	9.25	27.7		2017-07-27	8.89	34.6
2017-07-29	9.46	27.8		2017-07-27	9.48	31.9
2017-07-29	9.51	27.7		2017-07-27	9.53	30.1
2017-07-29	9.53	27.1		2017-07-28	9.21	28.6
2017-07-29	9.39	26.5		2017-07-28	8.85	27.4
2017-07-30	9.19	26.1		2017-07-28	8.58	27.2
2017-07-30	8.97	25.7		2017-07-28	8.27	29.7
2017-07-30	8.75	25.6		2017-07-28	8.45	34.1
2017-07-30	8.92	26.6		2017-07-28	9.1	33.3
2017-07-30	9.58	28.9		2017-07-28	9.04	31.7
2017-07-30	10.16	30.1		2017-07-28	8.18	30.2
2017-07-30	10.2	29.6		2017-07-29	7.78	28.5
2017-07-30	10.07	28.8		2017-07-29	7.67	27.9
2017-07-31	9.81	28		2017-07-29	7.6	27.6
2017-07-31	9.62	27.5		2017-07-29	7.65	28.2
2017-07-31	9.46	27.3		2017-07-29	7.88	28.3
2017-07-31	9.34	27.2		2017-07-29	7.98	28.1
2017-07-31	9.47	28.1		2017-07-29	7.79	27.4
2017-07-31	9.28	28.4		2017-07-29	7.62	26.9
2017-07-31	8.79	28.2		2017-07-30	7.56	26.4
2017-07-31	8.09	27.7		2017-07-30	7.51	26
2017-08-01	7.71	27.3		2017-07-30	7.53	26.1
2017-08-01	7.78	27		2017-07-30	7.61	27.7
2017-08-01	7.95	27		2017-07-30	7.9	30.3
2017-08-01	8.7	28.1		2017-07-30	8.63	30.9
2017-08-01	9.64	30.9		2017-07-30	8.91	30
2017-08-01	10.08	32.9		2017-07-30	8.42	29
2017-08-01	9.69	32		2017-07-31	7.79	28.2
2017-08-01	9.15	30.8		2017-07-31	7.57	27.6
2017-08-02	8.39	29.8		2017-07-31	7.55	27.6
2017-08-02	8.03	28.9		2017-07-31	7.57	27.5
2017-08-02	8.07	28.4		2017-07-31	7.38	28.5
2017-08-02	9.02	29.7		2017-07-31	7.48	28.2
2017-08-02	9.77	32.5		2017-07-31	7.43	27.4
2017-08-02	9.91	34.1		2017-07-31	7.41	26.7
2017-08-02	9.29	32.9		2017-08-01	7.42	26.2
2017-08-02	8.47	31.2		2017-08-01	7.5	25.8
2017-08-03	7.64	29.9		2017-08-01	7.56	26.1
2017-08-03	6.88	28.8		2017-08-01	8.41	27.7
2017-08-03	6.76	28.3		2017-08-01	9.16	31.6
2017-08-03	7.78	30.7		2017-08-01	9.26	33
2017-08-03	8.67	33.9		2017-08-01	8.7	31.6
2017-08-03	8.69	33.9		2017-08-01	7.72	30.4
2017-08-03	8.19	32.6		2017-08-02	7.38	29.2
2017-08-03	7.34	31.1		2017-08-02	7.44	28.4
2017-08-04	6.12	30		2017-08-02	7.7	28.2
2017-08-04	5.25	29.2		2017-08-02	8.44	30.3
2017-08-04	5.34	29		2017-08-02	8.82	34
2017-08-04	7.06	31.6		2017-08-02	8.78	34.7
2017-08-04	8.33	35.5		2017-08-02	7.9	32.9
2017-08-04	8.32	35.9		2017-08-02	7.46	30.9
2017-08-04	7.65	34.9		2017-08-03	7.34	29.5
2017-08-04	6.75	33.4		2017-08-03	7.35	28.2
2017-08-05	5.78	32		2017-08-03	7.44	28.5
2017-08-05	4.71	30.8		2017-08-03	7.99	31.6
2017-08-05	4.61	30.5		2017-08-03	8.47	33.5
2017-08-05	5.88	32.7		2017-08-03	8.68	33.9
2017-08-05	6.85	36.1		2017-08-03	8.34	32.3
2017-08-05	7.01	36.7		2017-08-03	7.93	30.8
2017-08-05	6.43	35.3		2017-08-04	7.72	29.8
2017-08-05	5.48	33.6		2017-08-04	7.62	28.7
2017-08-06	4.16	32.3		2017-08-04	7.62	29.2
2017-08-06	3.71	31.2		2017-08-04	8.3	33
2017-08-06	3.78	30.8		2017-08-04	8.98	36.8
2017-08-06	5.01	33		2017-08-04	9.32	37.1
2017-08-06	6.16	36.3		2017-08-04	9.02	32
2017-08-06	6.54	37.5		2017-08-04	8.06	28.6
2017-08-06	6.21	35.7		2017-08-05	7.53	26
2017-08-06	5.69	34		2017-08-05	7.38	24.3
2017-08-07	5.25	32.7		2017-08-05	7.34	24.9
2017-08-07	4.7	31.3		2017-08-05	7.45	29.5
2017-08-07	4.53	30.8		2017-08-05	8.58	34.5
2017-08-07	5.27	33		2017-08-05	9.19	34.6
2017-08-07	6.14	35.5		2017-08-05	9.2	33.1
2017-08-07	6.57	36.2		2017-08-05	8.93	31.8
2017-08-07	6.29	34.5		2017-08-06	8.48	30.6
2017-08-07	5.83	32.8		2017-08-06	7.98	29.6
2017-08-08	5.44	31.4		2017-08-06	7.87	30.2
2017-08-08	5.05	30.2		2017-08-06	8.67	34.3
2017-08-08	4.84	29.8		2017-08-06	8.66	36.8
2017-08-08	5.36	32.1		2017-08-06	9.15	37.5
2017-08-08	6.07	34.4		2017-08-06	9.14	35.1
2017-08-08	6.34	35		2017-08-06	8.84	33
2017-08-08	6.03	33.5		2017-08-07	8.44	31.1
2017-08-08	5.54	32		2017-08-07	8.02	29.9
2017-08-09	4.97	30.9		2017-08-07	7.87	30.3
2017-08-09	4	30.1		2017-08-07	8.24	32.7
2017-08-09	3.53	29.6		2017-08-07	8.54	35.2
2017-08-09	4.03	29.5		2017-08-07	8.88	35
2017-08-09	3.76	29.7		2017-08-07	8.7	33.3
2017-08-09	4.12	28.2		2017-08-07	8.13	31.6
2017-08-09	3.89	27		2017-08-08	7.7	30.3
2017-08-09	3.7	26.6		2017-08-08	7.52	29.1
2017-08-10	3.78	26.4		2017-08-08	7.5	29.3
2017-08-10	3.83	26.2		2017-08-08	7.89	32.6
2017-08-10	3.87	27.2		2017-08-08	7.87	35
2017-08-10	4.37	28		2017-08-08	8.05	34.3
2017-08-10	3.58	26.1		2017-08-08	7.69	32.5
2017-08-10	3.48	25.3		2017-08-08	7.45	31.2
2017-08-10	3.61	25.6		2017-08-09	7.36	30.3
2017-08-10	3.34	25.6		2017-08-09	7.4	29.3
2017-08-11	3.26	25.5		2017-08-09	7.4	28.8
2017-08-11	3.24	25.3		2017-08-09	7.46	29.2
2017-08-11	3.34	25.5		2017-08-09	7.53	29.7
2017-08-11	3.91	27.3		2017-08-09	7.55	29.4
2017-08-11	5.51	21		2017-08-09	7.6	28.7
2017-08-11	9.16	32.6		2017-08-09	7.65	28.1
2017-08-11	9.08	31.6		2017-08-10	7.65	27.6
2017-08-11	8.68	30.3		2017-08-10	7.64	27.2
2017-08-12	8.14	29.3		2017-08-10	7.64	27
2017-08-12	7.6	28.6		2017-08-10	7.65	27.6
2017-08-12	7.39	28		2017-08-10	7.89	29.1
2017-08-12	8.04	29.3		2017-08-10	7.83	29.7
2017-08-12	8.75	32.6		2017-08-10	7.57	28.7
2017-08-12	8.94	33.5		2017-08-10	7.39	27.9
2017-08-12	8.69	32.3		2017-08-11	7.32	27.2
2017-08-12	8.52	30.6		2017-08-11	7.29	26.5
2017-08-13	8.31	29.6		2017-08-11	7.27	26.9
2017-08-13	8.11	28.8		2017-08-11	7.33	30.7
2017-08-13	7.94	28.3		2017-08-11	7.58	34.6
2017-08-13	8.15	28.7		2017-08-11	8.2	33.7
2017-08-13	8.26	29.1		2017-08-11	8.08	31.7
2017-08-13	8.53	29.6		2017-08-11	7.69	30
2017-08-13	8.22	29.1		2017-08-12	7.49	28.6
2017-08-13	7.59	28.3		2017-08-12	7.42	27.3
2017-08-14	7.55	27.9		2017-08-12	7.38	27.9
2017-08-14	7.53	27.5		2017-08-14	8.56	24.4
2017-08-14	7.52	27.1		2017-08-14	7.9	24.6
2017-08-14	7.57	26.8		2017-08-14	7.58	24.3
2017-08-14	7.98	27.3		2017-08-15	7.49	24.1
2017-08-14	8.05	27.5		2017-08-15	7.44	23.9
2017-08-14	7.72	27.3		2017-08-15	7.45	23.7
2017-08-14	7.43	27		2017-08-15	7.93	24.4
2017-08-15	7.34	26.7		2017-08-15	8.33	25.3
2017-08-15	7.31	26.4		2017-08-15	8.26	25.6
2017-08-15	7.33	26.2		2017-08-15	7.84	25.5
2017-08-15	7.6	26.6		2017-08-15	7.53	25.2
2017-08-15	7.91	27.1		2017-08-16	7.4	25.1
2017-08-15	7.86	27.3		2017-08-16	7.39	24.7
2017-08-15	7.58	27.2		2017-08-16	7.38	24.4
2017-08-15	7.36	26.9		2017-08-16	7.71	25.1
2017-08-16	7.3	26.8		2017-08-16	8.37	27
2017-08-16	7.28	26.5		2017-08-16	8.56	30.1
2017-08-16	7.28	26.3		2017-08-16	7.99	29.9
2017-08-16	7.47	26.7		2017-08-16	7.55	28.4
2017-08-16	8.14	28.1		2017-08-17	7.39	27.5
2017-08-16	8.61	30.5		2017-08-17	7.3	26.8
2017-08-16	8.56	30.4		2017-08-17	7.29	26.1
2017-08-16	8.21	29.4		2017-08-17	7.3	26.3
2017-08-17	7.81	28.5		2017-08-17	7.43	27.3
2017-08-17	7.52	28		2017-08-17	7.17	29.7
2017-08-17	7.41	27.6		2017-08-17	7.2	29.3
2017-08-17	7.53	27.7		2017-08-17	7.18	28.2
2017-08-17	7.99	28.4		2017-08-18	7.15	27.2
2017-08-17	6.79	30.4		2017-08-18	7.13	26.4
2017-08-17	8.06	29.7		2017-08-18	7.12	25.8
2017-08-17	7.25	27.2		2017-08-18	7.05	26.9
2017-08-18	7.28	26.8		2017-08-18	7.19	30.5
2017-08-18	7.31	26.5		2017-08-18	7.34	33.1
2017-08-18	7.35	26.2		2017-08-18	7.2	32.2
2017-08-18	7.86	27.2		2017-08-18	7.17	30.7
2017-08-18	8.77	30.5		2017-08-19	7.12	29.4
2017-08-18	9.26	33.3		2017-08-19	7.11	28.3
2017-08-18	9.16	32.4		2017-08-19	7.11	27.6
2017-08-18	8.9	30.9		2017-08-19	7.1	28.2
2017-08-19	8.66	29.7		2017-08-19	7.15	31.3
2017-08-19	8.36	28.8		2017-08-19	7.27	33
2017-08-19	8.02	28.1		2017-08-19	7.26	31.5
2017-08-19	8.31	28.6		2017-08-19	7.18	29.6
2017-08-19	8.98	31.6		2017-08-20	7.14	28.6
2017-08-19	9.4	33.1		2017-08-20	7.13	27.9
2017-08-19	9.26	32.2		2017-08-20	7.11	27.3
2017-08-19	9.03	30.8		2017-08-20	7.06	27.4
2017-08-20	8.83	29.8		2017-08-20	6.95	28.9
2017-08-20	8.58	28.9		2017-08-20	7.15	29.6
2017-08-20	8.31	28.5		2017-08-20	7.21	29.4
2017-08-20	8.32	28.5		2017-08-20	7.2	28.5
2017-08-20	8.79	29.8		2017-08-21	7.16	27.7
2017-08-20	9.02	30.5		2017-08-21	7.15	27
2017-08-20	8.51	30.4		2017-08-21	7.16	26.6
2017-08-20	8.62	27.8		2017-08-21	7.15	27.1
2017-08-21	8.61	27.1		2017-08-21	7.19	30.4
2017-08-21	8.58	26.7		2017-08-21	7.54	27.6
2017-08-21	8.61	26.1		2017-08-21	7.09	25.4
2017-08-21	8.06	31.2		2017-08-22	8.06	34.2
2017-08-21	7.99	35.9		2017-08-22	8.34	31.1
2017-08-21	7.77	38.2		2017-08-22	7.82	29.4
2017-08-21	7.99	30.9		2017-08-22	7.57	28.6
2017-08-21	7.95	27.8		2017-08-23	7.47	27.8
2017-08-22	7.9	27.3		2017-08-23	7.43	27.4
2017-08-22	7.87	26.5		2017-08-23	7.27	27.1
2017-08-22	7.83	26.3		2017-08-23	7.43	28.9
2017-08-22	7.74	32.6		2017-08-23	7.78	32.2
2017-08-22	7.5	41.7		2017-08-23	7.82	33.8
2017-08-22	8.32	29.8		2017-08-23	7.41	32.8
2017-08-22	7.98	29.9		2017-08-23	7.21	31.5
2017-08-22	7.7	29.2		2017-08-24	7.23	30.3
2017-08-23	7.56	28.7		2017-08-24	7.23	29.4
2017-08-23	7.51	28.2		2017-08-24	7.12	28.7
2017-08-23	7.47	27.9		2017-08-24	7.31	29.7
2017-08-23	7.58	29.3		2017-08-24	8.35	33.2
2017-08-23	8.55	32.6		2017-08-24	8.29	34.3
2017-08-23	8.8	33.3		2017-08-24	7.47	33.5
2017-08-23	8.55	32.6		2017-08-24	7.26	32
2017-08-23	8.26	31.6		2017-08-25	7.23	30.8
2017-08-24	7.91	30.7		2017-08-25	7.22	29.9
2017-08-24	7.6	29.9		2017-08-25	7.2	28.9
2017-08-24	7.45	29.3		2017-08-25	7.33	29.8
2017-08-24	7.51	30.1		2017-08-25	8.03	32.6
2017-08-24	8.55	32.7		2017-08-25	8.71	34.5
2017-08-24	9	34.1		2017-08-25	8	32.6
2017-08-24	9.12	33.5		2017-08-25	7.4	30.3
2017-08-24	8.8	32.3		2017-08-26	7.27	28.2
2017-08-25	8.4	31.6		2017-08-26	7.25	26.6
2017-08-25	7.86	30.7		2017-08-26	7.25	25.2
2017-08-25	7.46	29.8		2017-08-26	7.22	26.4
2017-08-25	8.31	30.3		2017-08-26	7.45	29
2017-08-25	9.12	32.4		2017-08-26	7.68	28.2
2017-08-25	9.56	34.3		2017-08-26	7.4	27.1
2017-08-25	9.47	33.3		2017-08-26	7.26	24.9
2017-08-25	9.19	31.2		2017-08-27	7.27	24
2017-08-26	8.92	29.6		2017-08-27	7.28	22.2
2017-08-26	8.63	28.1		2017-08-27	7.31	22.1
2017-08-26	8.25	26.9		2017-08-27	7.21	24.4
2017-08-26	8.29	27.6		2017-08-27	7.21	29
2017-08-26	8.92	30.3		2017-08-27	7.18	32.2
2017-08-26	9.33	32.3		2017-08-27	6.97	27.2
2017-08-26	9.14	31.5		2017-08-27	7.12	27
2017-08-26	8.83	29.3		2017-08-28	7.26	25
2017-08-27	8.43	27.7		2017-08-28	7.33	24
2017-08-27	7.9	26.4		2017-08-28	7.37	22.9
2017-08-27	7.55	25.7		2017-08-28	7.22	25.9
2017-08-27	7.97	26.7		2017-08-28	7.19	30
2017-08-27	8.91	29.9		2017-08-28	2.11	35.6
2017-08-27	9.44	32.2		2017-08-28	5.54	28.6
2017-08-27	9.47	31.5		2017-08-28	3.36	25.9
2017-08-27	9.16	29.6		2017-08-29	7.2	25.1
2017-08-28	8.89	28.2		2017-08-29	7.12	23.9
2017-08-28	8.57	26.9		2017-08-29	7.17	21.7
2017-08-28	8.19	26		2017-08-29	7.18	23.8
2017-08-28	8.58	27.1		2017-08-29	7.22	26.5
2017-08-28	9.13	30.7		2017-08-29	7.89	37.5
2017-08-28	9.08	31.8		2017-08-29	9.19	26.1
2017-08-28	8.63	31.3		2017-08-29	6.68	21.3
2017-08-28	8.08	29.8		2017-08-30	7.99	20.2
2017-08-29	7.54	28.9		2017-08-30	7.2	26.2
2017-08-29	7.35	28.2		2017-08-30	7.9	28.2
2017-08-29	7.3	27.2		2017-08-30	7.86	25.5
2017-08-29	7.9	28.1		2017-08-30	9.02	22.4
2017-08-29	8.45	31.1		2017-08-30	6.61	18.3
2017-08-29	8.18	30.8		2017-08-31	6	17.5
2017-08-29	7.48	29.6		2017-08-31	5.12	17.3
2017-08-29	7.29	27.5		2017-08-31	6.22	16.2
2017-08-30	7.28	25.5		2017-08-31	6.64	29.1
2017-08-30	7.28	24.9		2017-08-31	8.93	38.2
2017-08-30	7.3	24.1		2017-08-31	7.35	35.2
2017-08-30	7.24	24		2017-08-31	7.23	26.1
2017-08-30	7.48	25.2		2017-08-31	7.39	24.5
2017-08-30	7.39	25.7		2017-09-01	7.49	23
2017-08-30	7.19	25.4		2017-09-01	7.6	21.8
2017-08-30	7.23	24.9		2017-09-01	7.67	20.8
2017-08-31	7.26	24.3		2017-09-01	7.57	22.7
2017-08-31	7.27	23.7		2017-09-01	7.66	27.2
2017-08-31	7.27	23.1		2017-09-01	7.9	29.7
2017-08-31	7.18	24.5		2017-09-01	7.41	27.9
2017-08-31	7.29	27.8		2017-09-01	7.42	25.7
2017-08-31	7.57	33		2017-09-02	7.46	24
2017-08-31	7.7	27.3		2017-09-02	7.54	22.5
2017-08-31	7.96	23.5		2017-09-02	7.6	21.2
2017-09-01	7.92	21.5		2017-09-02	7.99	22.9
2017-09-01	7.92	20.5		2017-09-02	8.56	27
2017-09-01	7.85	20.8		2017-09-02	8.82	28.9
2017-09-01	7.37	30.7		2017-09-02	8.56	27.6
2017-09-01	8.3	40.2		2017-09-02	8	25.7
2017-09-01	6.96	41.1		2017-09-03	7.7	24
2017-09-01	7.34	26.9		2017-09-03	7.61	22.5
2017-09-01	7.35	25.8		2017-09-03	7.61	21.2
2017-09-02	7.24	24.8		2017-09-03	8.22	23
2017-09-02	7.29	23.8		2017-09-03	8.87	27.8
2017-09-02	7.38	23		2017-09-03	8.57	30.9
2017-09-02	8.13	25		2017-09-03	7.57	29.1
2017-09-02	8.91	28.6		2017-09-03	7.33	26.8
2017-09-02	9.15	29.9		2017-09-04	7.33	25.2
2017-09-02	9.21	28.7		2017-09-04	7.35	23.7
2017-09-02	8.99	27.4		2017-09-04	7.39	22.5
2017-09-03	8.84	26.2		2017-09-04	7.27	23.6
2017-09-03	8.64	25		2017-09-04	7.13	27.6
2017-09-03	8.43	24		2017-09-04	7.24	29.5
2017-09-03	8.75	25.7		2017-09-04	7.1	28.3
2017-09-03	9.01	29.2		2017-09-04	7.19	26.4
2017-09-03	8.66	29.6		2017-09-05	7.27	24.9
2017-09-03	8.49	29		2017-09-05	7.35	23.7
2017-09-03	8.22	27.9		2017-09-05	7.4	22.8
2017-09-04	7.98	27		2017-09-05	7.45	23.2
2017-09-04	7.81	26.2		2017-09-05	7.9	24.3
2017-09-04	7.72	25.4		2017-09-05	7.67	24.8
2017-09-04	7.84	26		2017-09-05	7.31	24.3
2017-09-04	8.18	28.5		2017-09-05	7.39	23.8
2017-09-04	8.3	29.9		2017-09-06	7.46	23.4
2017-09-04	7.93	29.1		2017-09-06	7.51	22.9
2017-09-04	7.67	28.1		2017-09-06	7.49	22.6
2017-09-05	7.59	27.2		2017-09-06	7.4	22.9
2017-09-05	7.54	26.5		2017-09-06	7.85	24.7
2017-09-05	7.56	25.8		2017-09-06	8.57	25.7
2017-09-05	7.66	26.2		2017-09-06	8.37	22.1
2017-09-05	7.79	26.7		2017-09-06	8.85	19.2
2017-09-05	7.6	27		2017-09-07	8.82	18.3
2017-09-05	7.33	26.7		2017-09-07	8.95	18.3
2017-09-05	7.41	26.3		2017-09-07	9.04	18.3
2017-09-06	7.45	25.9		2017-09-07	9.22	37.2
2017-09-06	7.48	25.5		2017-09-07	8.95	35.4
2017-09-06	7.48	25.2		2017-09-07	9.08	25
2017-09-06	7.33	25.4		2017-09-07	8.81	22.7
2017-09-06	7.5	26.3		2017-09-08	8.47	21.4
2017-09-06	7.48	26.9		2017-09-08	8.12	20.2
2017-09-06	7.21	26.6		2017-09-08	7.96	19.4
2017-09-06	7.29	25.9		2017-09-08	8.93	25.7
2017-09-07	7.34	25.4		2017-09-08	9.54	30.6
2017-09-07	7.36	24.9		2017-09-08	10.19	34.1
2017-09-07	7.35	24.5		2017-09-08	10.34	27.6
2017-09-07	7.28	25.3		2017-09-08	10.03	24.5
2017-09-07	7.76	27.6		2017-09-09	9.78	22.3
2017-09-07	7.86	29.9		2017-09-09	9.57	20.9
2017-09-07	7.23	29.3		2017-09-09	9.36	20.4
2017-09-07	7.16	28.2		2017-09-09	9.61	27.3
2017-09-08	7.16	27.2		2017-09-09	8.85	26.8
2017-09-08	7.18	26.2		2017-09-09	8.74	28.9
2017-09-08	7.22	25.4		2017-09-09	7.72	27.9
2017-09-08	7.54	26.4		2017-09-09	7.68	26.4
2017-09-08	8.38	28.9		2017-09-10	7.7	25.1
2017-09-08	8.75	31.1		2017-09-10	7.73	23.9
2017-09-08	8.64	30.3		2017-09-10	7.66	22.9
2017-09-08	8.28	29		2017-09-10	7.65	23.8
2017-09-09	7.82	27.9		2017-09-10	8.53	27.5
2017-09-09	7.48	26.9		2017-09-10	8.42	28.2
2017-09-09	7.38	26		2017-09-10	7.59	27.4
2017-09-09	8	26.8		2017-09-10	7.57	26.4
2017-09-09	8.51	30.1		2017-09-11	7.56	25.6
2017-09-09	8.4	33		2017-09-11	7.57	24.8
2017-09-09	8.27	28.1		2017-09-11	7.66	23.6
2017-09-09	8.58	24		2017-09-11	7.53	22.9
2017-09-10	8.17	22.4		2017-09-11	7.66	23.3
2017-09-10	8.03	21.3		2017-09-11	7.67	24
2017-09-10	7.63	21.1		2017-09-11	7.45	23.7
2017-09-10	7.53	22.1		2017-09-11	7.55	23.2
2017-09-10	8.43	25.3		2017-09-12	7.59	22.6
2017-09-10	8.84	26.6		2017-09-12	7.62	22.1
2017-09-10	8.84	26.3		2017-09-12	7.65	21.5
2017-09-10	8.71	25.9		2017-09-12	7.82	23.1
2017-09-11	8.55	25.6		2017-09-12	8.36	26.7
2017-09-11	8.33	25.3		2017-09-12	8.53	29.2
2017-09-11	8.13	24.9		2017-09-12	7.54	28.1
2017-09-11	8.09	24.7		2017-09-12	7.46	26.4
2017-09-11	8.48	25.3		2017-09-13	7.51	24.7
2017-09-11	8.76	25.7		2017-09-13	7.56	23.1
2017-09-11	8.73	25.7		2017-09-13	7.61	21.8
2017-09-11	8.6	25.3		2017-09-13	7.85	23.1
2017-09-12	8.44	24.7		2017-09-13	8.65	26.7
2017-09-12	8.25	24.3		2017-09-13	8.58	28.9
2017-09-12	8.06	23.8		2017-09-13	7.47	27.7
2017-09-12	8.4	25		2017-09-13	7.44	25.8
2017-09-12	8.37	28.1		2017-09-14	7.48	24.2
2017-09-12	8.56	30.7		2017-09-14	7.54	22.8
2017-09-12	8.39	29.8		2017-09-14	7.62	21.5
2017-09-12	8.15	28.2		2017-09-14	8.1	22.7
2017-09-13	7.92	26.7		2017-09-14	8.95	26.6
2017-09-13	7.75	25.3		2017-09-14	9.27	29.3
2017-09-13	7.67	24		2017-09-14	9.04	28.1
2017-09-13	7.75	25		2017-09-14	8.65	26.1
2017-09-13	8.36	28		2017-09-15	8.14	24.4
2017-09-13	8.47	29.8		2017-09-15	7.8	23.1
2017-09-13	8.26	28.8		2017-09-15	7.7	22.1
2017-09-13	8.01	27.2		2017-09-15	8.09	22.9
2017-09-14	7.71	25.7		2017-09-15	6.96	25.5
2017-09-14	7.54	24.5		2017-09-15	9.29	26.3
2017-09-14	7.46	23.4		2017-09-15	9.25	21.3
2017-09-14	7.7	24.5		2017-09-15	9.14	18
2017-09-14	8.56	27.9		2017-09-16	8.73	17.2
2017-09-14	8.79	30.2		2017-09-16	8.04	16.6
2017-09-14	8.8	29.1		2017-09-16	7.23	16.4
2017-09-14	8.77	27.4		2017-09-16	9.05	31.6
2017-09-15	8.55	26		2017-09-16	8.17	27.4
2017-09-15	8.29	24.8		2017-09-16	7.84	21.6
2017-09-15	8.04	23.9		2017-09-16	7.85	20.9
2017-09-15	7.86	24.7		2017-09-17	7.87	20.4
2017-09-15	8.44	26.7		2017-09-17	7.9	20.2
2017-09-15	8.95	27.1		2017-09-17	7.92	19.9
2017-09-15	8.4	26.6		2017-09-17	8.16	20
2017-09-15	8.09	25.7		2017-09-17	9.09	22.4
2017-09-16	7.7	25		2017-09-17	9.44	23.3
2017-09-16	7.45	24.4		2017-09-17	9.49	22.2
2017-09-16	7.37	23.7		2017-09-17	9.34	21.4
2017-09-16	7.2	24.3		2017-09-18	9.21	20.3
2017-09-16	7.82	25.8		2017-09-18	9.08	19.2
2017-09-16	8.63	26.7		2017-09-18	8.96	18.3
2017-09-16	8.23	26		2017-09-18	9.36	22.7
2017-09-16	7.86	25.4		2017-09-18	9.29	25
2017-09-17	7.56	25		2017-09-18	8.77	26.5
2017-09-17	7.41	24.7		2017-09-18	7.89	24.8
2017-09-17	7.35	24.4		2017-09-18	7.82	23.4
2017-09-17	7.24	24.4		2017-09-19	7.82	22.1
2017-09-17	7.58	25.6		2017-09-19	7.84	21
2017-09-17	7.88	25.9		2017-09-19	7.84	20.2
2017-09-17	7.64	25.6		2017-09-19	7.84	21.3
2017-09-17	7.41	25		2017-09-19	8.21	24.9
2017-09-18	7.32	24.3		2017-09-19	7.84	26.6
2017-09-18	7.28	23.6		2017-09-19	7.68	26.1
2017-09-18	7.29	22.9		2017-09-19	7.64	24.9
2017-09-18	7.6	24.3		2017-09-20	7.66	24
2017-09-18	7.87	27.9		2017-09-20	7.7	23.1
2017-09-18	7.9	29.7		2017-09-20	7.69	22.5
2017-09-18	8.52	28.5		2017-09-20	7.94	22.6
2017-09-18	8.05	27.2		2017-09-20	8.67	23.7
2017-09-19	7.6	26		2017-09-20	9.11	25.9
2017-09-19	7.42	24.9		2017-09-20	8.85	24.6
2017-09-19	7.34	24.1		2017-09-20	8.52	22.8
2017-09-19	7.36	25		2017-09-21	8.15	21.3
2017-09-19	8.28	28.2		2017-09-21	7.96	20
2017-09-19	8.73	29.6		2017-09-21	7.93	18.9
2017-09-19	8.47	29		2017-09-21	8.17	19.8
2017-09-19	8.02	27.9		2017-09-21	8.85	23.3
2017-09-20	7.57	27.1		2017-09-21	9.19	25.7
2017-09-20	7.38	26.4		2017-09-21	8.95	24.8
2017-09-20	7.32	25.9		2017-09-21	8.64	23.2
2017-09-20	7.34	26.1		2017-09-22	8.27	21.9
2017-09-20	7.64	26.3		2017-09-22	8.02	20.8
2017-09-20	8.28	27.7		2017-09-22	7.88	19.8
2017-09-20	7.82	27.4		2017-09-22	7.98	21
2017-09-20	7.46	26.2		2017-09-22	8.67	24.9
2017-09-21	7.39	25.1		2017-09-22	8.99	27.5
2017-09-21	7.38	24.1		2017-09-22	8.28	26.2
2017-09-21	7.4	23.2		2017-09-22	7.9	24.4
2017-09-21	7.61	23.9		2017-09-23	7.78	23
2017-09-21	8.14	26.1		2017-09-23	7.78	21.6
2017-09-21	8.72	27		2017-09-23	7.8	20.7
2017-09-21	8.28	21.7		2017-09-23	8.65	21.7
2017-09-24	8.27	25		2017-09-23	9.18	24.4
2017-09-24	8.45	27.8		2017-09-23	9.44	26.5
2017-09-24	8.26	28.3		2017-09-23	9.14	26
2017-09-24	7.8	27.2		2017-09-23	8.89	24.4
2017-09-24	7.62	26.5		2017-09-24	8.62	23
2017-09-25	7.56	25.7		2017-09-24	8.28	21.8
2017-09-25	7.53	25		2017-09-24	7.99	20.7
2017-09-25	7.6	24.8		2017-09-24	8.27	22
2017-09-25	8.17	26.7		2017-09-24	9.01	25.6
2017-09-25	8.52	29.2		2017-09-24	9.24	27.8
2017-09-25	8.32	29.5		2017-09-24	9.26	24.6
2017-09-25	7.99	28.2		2017-09-24	9.16	21
2017-09-25	7.7	27.2		2017-09-25	9.08	19
2017-09-26	7.56	26.2		2017-09-25	9.06	17.9
2017-09-26	7.48	25.3		2017-09-25	9.08	18
2017-09-26	7.44	24.9		2017-09-25	9.05	27.6
2017-09-26	8.39	26.5		2017-09-25	9.26	32
2017-09-26	8.83	29.3		2017-09-25	8.99	33.6
2017-09-26	8.92	29.8		2017-09-25	8.93	24.5
2017-09-26	8.75	28.6		2017-09-25	8.66	22.5
2017-09-26	8.59	27.8		2017-09-26	8.36	21
2017-09-27	8.37	27.3		2017-09-26	8.11	19.8
2017-09-27	8.09	26.6		2017-09-26	8.01	18.6
2017-09-27	7.83	25.9		2017-09-26	9	24.3
2017-09-27	7.84	25.5		2017-09-26	9.68	29.2
2017-09-27	7.39	25.2		2017-09-26	10.26	29.4
2017-09-27	7.22	25.2		2017-09-26	10.25	26.7
2017-09-27	7.16	24.8		2017-09-26	9.95	24.6
2017-09-27	7.22	24.5		2017-09-27	9.7	23.4
2017-09-28	7.25	24.1		2017-09-27	9.49	22.3
2017-09-28	7.25	23.8		2017-09-27	9.28	22.3
2017-09-28	7.22	23.7		2017-09-27	9.25	21.1
2017-09-28	7.8	25.8		2017-09-27	8.68	21.2
2017-09-28	8.42	28.3		2017-09-27	7.64	21.3
2017-09-28	8.43	27.9		2017-09-27	7.44	21.1
2017-09-28	7.98	26.5		2017-09-27	7.6	20.8
2017-09-28	7.68	25.3		2017-09-28	7.71	20.5
2017-09-29	7.45	24.3		2017-09-28	7.78	20.1
2017-09-29	7.38	23.4		2017-09-28	7.76	19.9
2017-09-29	7.52	23		2017-09-28	7.92	21.5
2017-09-29	8.37	24.5		2017-09-28	8.9	25.4
2017-09-29	8.84	26		2017-09-28	9.33	26.8
2017-09-29	9.01	25.9		2017-09-28	8.59	24.4
2017-09-29	8.82	24.8		2017-09-28	8.05	22.2
2017-09-29	8.62	23.8		2017-09-29	7.84	20.3
2017-09-30	8.4	22.7		2017-09-29	7.81	18.7
2017-09-30	8.18	21.6		2017-09-29	7.81	17.2
2017-09-30	8.12	21.2		2017-09-29	8.32	18.2
2017-09-30	8.71	23.5		2017-09-29	9.21	21.3
2017-09-30	8.74	26.5		2017-09-29	9.54	22.9
2017-09-30	8.67	27		2017-09-29	9.21	21.5
2017-09-30	8.13	25.7		2017-09-29	8.9	19.9
2017-09-30	7.76	24.5		2017-09-30	8.53	18.4
2017-10-01	7.55	23.4		2017-09-30	8.1	17
2017-10-01	7.49	22.5		2017-09-30	7.95	15.7
2017-10-01	7.29	22.1		2017-09-30	8.88	17.4
2017-10-01	7.42	23.2		2017-09-30	8.56	22.2
2017-10-01	7.58	23.9		2017-09-30	9.28	25
2017-10-01	7.34	23.8		2017-09-30	7.89	23.7
2017-10-01	7.32	23.3		2017-09-30	7.68	21.6
2017-10-01	7.38	22.8		2017-10-01	7.67	20
2017-10-02	7.43	22.4		2017-10-01	7.69	18.5
2017-10-02	7.43	22.2		2017-10-01	7.72	17.7
2017-10-02	7.3	22		2017-10-01	7.76	18.3
2017-10-02	7.51	23.1		2017-10-01	8.23	19.4
2017-10-02	7.89	25		2017-10-01	8.04	20
2017-10-02	7.58	25		2017-10-01	7.53	19.4
2017-10-02	7.3	24.5		2017-10-01	7.65	19
2017-10-02	7.34	24.1		2017-10-02	7.73	18.7
2017-10-03	7.38	23.7		2017-10-02	7.78	18.5
2017-10-03	7.39	23.4		2017-10-02	7.77	18.4
2017-10-03	7.2	23.3		2017-10-02	7.73	18.9
2017-10-03	7.69	25.2		2017-10-02	8.79	21.7
2017-10-06	7.49	27.1		2017-10-02	8.99	23.4
2017-10-06	7.35	20.7		2017-10-02	7.89	22.9
2017-10-06	7.41	21.1		2017-10-02	7.71	22.2
2017-10-06	7.42	20.9		2017-10-03	7.67	21.5
2017-10-06	7.52	20.8		2017-10-03	7.66	21
2017-10-07	7.59	20.7		2017-10-03	7.69	20.7
2017-10-07	7.62	20.6		2017-10-03	7.77	21.6
2017-10-07	7.54	20.7		2017-10-03	9.21	25.7
2017-10-07	7.89	22.8		2017-10-12	6.99	15.6
2017-10-07	8.34	24.6		2017-10-12	8.34	15.3
2017-10-07	8.22	24.8		2017-10-12	8.21	14.4
2017-10-07	7.69	24.2		2017-10-12	8.12	13.5
2017-10-07	7.61	23.5		2017-10-12	7.37	13.9
2017-10-08	7.56	22.9		2017-10-13	6.5	12.3
2017-10-08	7.54	22.4		2017-10-13	6.73	8.7
2017-10-08	7.46	22.3		2017-10-13	3.96	13.6
2017-10-08	8.35	24.4		2017-10-13	9.06	26
2017-10-08	8.79	26.9		2017-10-13	7.57	31.6
2017-10-08	9	27.3		2017-10-13	6.64	24.8
2017-10-08	8.8	26.3		2017-10-13	6.3	15.6
2017-10-08	8.57	25.6		2017-10-13	6.73	14.8
2017-10-09	8.29	24.8		2017-10-14	7.41	13.1
2017-10-09	7.96	24		2017-10-14	6.13	10.3
2017-10-09	7.8	23.8		2017-10-14	8	26.6
2017-10-09	8.63	25.7		2017-10-14	7.43	33.9
2017-10-09	8.6	28.6		2017-10-14	6.87	28.9
2017-10-09	8.39	28.6		2017-10-14	6.72	14.9
2017-10-09	7.68	27.4		2017-10-14	6.67	13.7
2017-10-09	7.48	26.2		2017-10-15	6.8	13.8
2017-10-10	7.39	25.1		2017-10-15	5.71	12
2017-10-10	7.39	24.2		2017-10-15	5.04	13.2
2017-10-10	7.38	23.7		2017-10-15	5.56	17.1
2017-10-10	7.92	25.8		2017-10-15	7.21	23.2
2017-10-10	8.19	27.5		2017-10-15	7.16	21
2017-10-10	7.91	27.5		2017-10-15	6.31	15.5
2017-10-10	7.31	26.4		2017-10-15	6.4	14.9
2017-10-10	7.32	25.5		2017-10-16	6.63	14.8
2017-10-11	7.34	24.8		2017-10-16	6.61	14.1
2017-10-11	7.38	24.2		2017-10-16	6.73	14.8
2017-10-11	7.36	23.8		2017-10-16	7.17	21.2
2017-10-11	7.14	23.8		2017-10-16	7.82	23.6
2017-10-11	7.21	24.6		2017-10-16	7.64	23.6
2017-10-11	7.05	24.4		2017-10-16	6.38	14.7
2017-10-11	7.13	23.9		2017-10-16	5.24	12.1
2017-10-11	7.24	23.4		2017-10-17	5.19	11.2
2017-10-12	7.35	22.8		2017-10-17	6.5	10.7
2017-10-12	7.4	22.3		2017-10-17	6.51	12.6
2017-10-12	7.33	21.9		2017-10-17	7.31	23.7
2017-10-12	7.24	22		2017-10-17	7.39	32.1
2017-10-12	7.25	22.1		2017-10-17	6.52	22.8
2017-10-12	7.16	21.7		2017-10-17	5.5	16.7
2017-10-12	7.19	21.3		2017-10-17	6.15	13.7
2017-10-12	7.31	20.9		2017-10-18	5.98	13
2017-10-13	7.38	20.5		2017-10-18	5.12	14.2
2017-10-13	7.44	19.6		2017-10-18	5.42	15.3
2017-10-13	7.46	19.3		2017-10-18	6.49	19.4
2017-10-13	7.54	21.7		2017-10-18	6.25	22.3
2017-10-13	8.28	24.2		2017-10-18	6.3	18
2017-10-13	8.43	24		2017-10-18	6.12	16.2
2017-10-13	7.97	22.9		2017-10-18	5.84	14.7
2017-10-13	7.65	22.2		2017-10-19	5.78	13.7
2017-10-14	7.53	21.4		2017-10-19	6.2	11.4
2017-10-14	7.46	20.6		2017-10-19	6.11	12.9
2017-10-14	7.51	20.1		2017-10-19	6	26.1
2017-10-14	7.93	22.5		2017-10-19	6.64	30.1
2017-10-14	8.41	24.3		2017-10-19	5.8	18
2017-10-14	8.37	24.1		2017-10-19	5.73	16.6
2017-10-14	7.87	22.9		2017-10-19	5.9	15.4
2017-10-14	7.6	22.2		2017-10-20	6.13	14.6
2017-10-15	7.48	21.5		2017-10-20	6.3	12.3
2017-10-15	7.44	20.9		2017-10-20	5.89	15.2
2017-10-15	7.46	20.6		2017-10-20	6.27	23.8
2017-10-15	7.68	21.1		2017-10-20	7.17	35.1
2017-10-15	8.25	22.9		2017-10-20	6.78	21.4
2017-10-15	8.63	22.6		2017-10-20	5.99	15.3
2017-10-15	8.69	18.3		2017-10-20	6.22	11.9
2017-10-15	8.84	17.1		2017-10-21	6.29	11.3
2017-10-16	8.79	16.9		2017-10-21	6.35	10.4
2017-10-16	8.67	16.2		2017-10-21	6.27	12.4
2017-10-16	8.54	17		2017-10-21	5.78	23.8
2017-10-16	3.48	22.3		2017-10-21	6.85	32.2
2017-10-16	1.7	22.8		2017-10-21	6.69	29.8
2017-10-17	7.5	33.5		2017-10-21	6.13	14.4
2017-10-17	7.14	23.4		2017-10-21	5.83	12.6
2017-10-17	7.22	18.6		2017-10-22	6.67	11.4
2017-10-17	7.39	16.4		2017-10-22	6.14	11
2017-10-18	7.55	15.8		2017-10-22	5.17	15.3
2017-10-18	7.65	16.1		2017-10-22	6.28	28.5
2017-10-18	7.68	16.9		2017-10-22	7.41	21
2017-10-18	7.49	18.4		2017-10-22	7.44	19.5
2017-10-18	7.61	19.8		2017-10-22	7.48	17.3
2017-10-18	7.42	19.8		2017-10-22	7.71	15.8
2017-10-18	7.5	19.5		2017-10-23	7.87	14.6
2017-10-18	7.64	19.1		2017-10-23	7.99	13.4
2017-10-19	7.72	18.8		2017-10-23	7.85	12.7
2017-10-19	7.76	18.3		2017-10-23	7.73	16.4
2017-10-19	7.74	18.1		2017-10-23	7.5	20
2017-10-19	7.8	19.8		2017-10-23	7.61	19.4
2017-10-19	8.41	22		2017-10-23	7.61	17.5
2017-10-19	8.1	21.9		2017-10-23	7.75	16.4
2017-10-19	7.77	21.4		2017-10-24	7.85	15.4
2017-10-19	7.75	20.9		2017-10-24	7.96	14.7
2017-10-20	7.73	20.4		2017-10-24	7.97	14.2
2017-10-20	7.74	19.8		2017-10-24	7.96	15.6
2017-10-20	7.76	19.7		2017-10-24	7.77	17.5
2017-10-20	8.23	21.8		2017-10-24	7.89	17.3
2017-10-20	8.74	24		2017-10-24	7.93	16
2017-10-20	8.78	24		2017-10-24	8.02	14.9
2017-10-20	8.52	23		2017-10-25	8.07	13.8
2017-10-20	8.32	22		2017-10-25	8.09	13
2017-10-21	8.1	21		2017-10-25	8.21	12.7
2017-10-21	7.91	20.2		2017-10-25	9.09	14.8
2017-10-21	7.9	19.7		2017-10-25	8.83	18.1
2017-10-21	8.4	21.5		2017-10-25	8.82	18.5
2017-10-21	8.87	23.4		2017-10-25	8.26	17.1
2017-10-21	8.97	23.4		2017-10-25	8.2	15.9
2017-10-21	8.64	22.4		2017-10-26	8.23	14.6
2017-10-21	8.44	21.4		2017-10-26	8.22	13.6
2017-10-22	8.21	20.5		2017-10-26	8.17	13.1
2017-10-22	7.97	19.7		2017-10-26	8.6	14.4
2017-10-22	7.7	19.3		2017-10-26	9.09	17.1
2017-10-22	7.94	21.2		2017-10-26	8.75	17.6
2017-10-22	8.39	22.8		2017-10-26	7.95	16.8
2017-10-22	8.22	23.2		2017-10-26	8.05	15.9
2017-10-22	7.62	22.4		2017-10-27	8.11	15.3
2017-10-22	7.59	21.7		2017-10-27	8.16	14.6
2017-10-23	7.59	21.1		2017-10-27	8.01	14.3
2017-10-23	7.6	20.3		2017-10-27	8.3	16.2
2017-10-23	7.54	19.7		2017-10-27	8.73	18.4
2017-10-23	8.56	21.8		2017-10-27	8.48	18.8
2017-10-23	8.91	23.2		2017-10-27	7.94	17.5
2017-10-23	8.78	22.7		2017-10-27	8.03	16.5
2017-10-23	8.3	20.9		2017-10-28	8.06	15.1
2017-10-23	8.04	19.7		2017-10-28	8.08	12.8
2017-10-24	7.84	18.6		2017-10-28	8.11	13.4
2017-10-24	7.73	17.8		2017-10-28	8.99	19.4
2017-10-24	7.61	17.2		2017-10-28	8.85	18.4
2017-10-24	8.21	18		2017-10-28	7.9	18.5
2017-10-24	7.98	19.1		2017-10-28	7.81	18
2017-10-24	8.04	19.1		2017-10-28	7.96	17.3
2017-10-24	7.83	18		2017-10-29	8.1	16.6
2017-10-24	7.78	17		2017-10-29	8.19	15.7
2017-10-25	7.75	16.1		2017-10-29	8.24	15
2017-10-25	7.75	15.3		2017-10-29	8.79	17.1
2017-10-25	7.83	14.9		2017-10-29	9.26	19.2
2017-10-25	8.72	16.6		2017-10-29	9.33	18.5
2017-10-25	8.86	19		2017-10-29	8.97	15.8
2017-10-25	8.73	19.6		2017-10-29	8.89	13.4
2017-10-25	8.34	18.4		2017-10-30	8.77	11.7
2017-10-25	8.07	17.4		2017-10-30	8.68	10.5
2017-10-26	7.89	16.3		2017-10-30	8.58	9.7
2017-10-26	7.8	15.4		2017-10-30	8.51	11.7
2017-10-26	7.76	14.9		2017-10-30	8.4	15
2017-10-26	7.97	16.1		2017-10-30	8.17	14.9
2017-10-26	8.54	18.3		2017-10-30	8.17	13.2
2017-10-26	8.28	18.9		2017-10-30	8.3	11.6
2017-10-26	7.7	18.4		2017-10-31	8.42	10.2
2017-10-26	7.68	17.8		2017-10-31	8.35	9
2017-10-27	7.69	17.4		2017-10-31	8.27	8.1
2017-10-27	7.69	16.9		2017-10-31	8.95	11
2017-10-27	7.7	16.8		2017-11-01	7.36	6.8
2017-10-27	8.35	18.6		2017-11-01	7.35	6.3
2017-10-27	8.96	20.1		2017-11-01	7.38	8.8
2017-10-27	9.1	20.5		2017-11-01	8.53	24.1
2017-10-27	8.94	19.7		2017-11-01	9.51	23.8
2017-10-27	8.78	19.1		2017-11-01	9.56	19.5
2017-10-28	8.6	18.3		2017-11-01	9.28	14
2017-10-28	8.4	17.6		2017-11-01	9.04	12
2017-10-28	8.25	17.4		2017-11-02	8.85	10
2017-10-28	8.91	19.4		2017-11-02	8.63	9.1
2017-10-28	9.04	20.2		2017-11-02	8.74	10.8
2017-10-28	8.59	20.2		2017-11-02	5.99	25
2017-10-28	8.03	19.8		2017-11-02	9.36	21.7
2017-10-28	7.84	19.3		2017-11-02	8.92	18.7
2017-10-29	7.75	18.9		2017-11-02	7.91	17.4
2017-10-29	7.72	18.3		2017-11-02	8	16.2
2017-10-29	7.67	17.9		2017-11-03	8.07	15
2017-10-29	8.05	19.7		2017-11-03	8.13	14
2017-10-29	8.56	21.1		2017-11-03	8.08	13.2
2017-10-29	8.53	20.7		2017-11-03	8.77	15.4
2017-10-29	7.88	19.6		2017-11-03	9.13	17.1
2017-10-29	7.76	18.5		2017-11-03	9.24	17.1
2017-10-30	7.73	17.5		2017-11-03	8.24	15.8
2017-10-30	7.73	16.5		2017-11-03	8.23	13.7
2017-10-30	7.8	15.9		2017-11-04	8.27	11.5
2017-10-30	7.88	14.3		2017-11-04	8.23	10.2
2017-10-30	7.92	27.6		2017-11-04	7.97	9.7
2017-10-30	8.05	19		2017-11-04	9.04	12
2017-10-30	7.68	9.7		2017-11-04	9.55	15.2
2017-10-30	7.68	8.7		2017-11-04	9.63	14.1
2017-10-31	7.76	6.1		2017-11-04	9.2	11.9
2017-10-31	7.76	4.9		2017-11-04	8.96	9.3
2017-10-31	7.7	8.1		2017-11-05	8.61	7.1
2017-10-31	8.05	23.2		2017-11-05	8.35	5.6
2017-10-31	7.15	24.9		2017-11-05	8.43	6
2017-10-31	7.14	21.3		2017-11-05	9.63	17
2017-10-31	7.57	10.7		2017-11-05	10.05	19.9
2017-10-31	7.61	8.6		2017-11-05	10.13	16.4
2017-11-01	7.59	8.2		2017-11-05	10.02	8.8
2017-11-01	7.79	6.7		2017-11-05	10.05	7
2017-11-01	7.71	10.1		2017-11-06	10.04	4.7
2017-11-01	7.8	25.4		2017-11-06	9.96	4.6
2017-11-01	7.44	25.1		2017-11-06	9.84	4.7
2017-11-01	7.65	23		2017-11-06	9.96	10.5
2017-11-01	7.61	14.4		2017-11-06	9.4	15
2017-11-01	7.57	12.5		2017-11-06	7.96	15.5
2017-11-02	7.5	11.5		2017-11-06	7.8	14.1
2017-11-02	7.52	11.6		2017-11-06	7.99	12.8
2017-11-02	7.56	12.7		2017-11-07	8.13	11.6
2017-11-02	7.85	24.7		2017-11-07	8.23	10.6
2017-11-02	8.88	19.8		2017-11-07	8.34	9.8
2017-11-02	8.35	19.7		2017-11-07	9.34	12.1
2017-11-02	7.94	18.5		2017-11-07	9.24	15.7
2017-11-02	7.82	17.5		2017-11-07	9.3	15.9
2017-11-03	7.77	16.6		2017-11-07	8.69	15.2
2017-11-03	7.76	15.9		2017-11-07	8.49	14.5
2017-11-03	7.81	15.5		2017-11-08	8.37	13.9
2017-11-03	8.15	17.3		2017-11-08	8.33	13.5
2017-11-03	8.15	18.4		2017-11-08	8.15	12.8
2017-11-03	7.93	18.5		2017-11-08	8.91	14.8
2017-11-03	7.67	17.4		2017-11-08	9.46	17.3
2017-11-03	7.7	15.9		2017-11-08	9.28	16.7
2017-11-04	7.73	15		2017-11-08	8.83	14.8
2017-11-04	7.74	14.4		2017-11-08	8.68	12.9
2017-11-04	7.89	14		2017-11-09	8.53	11.7
2017-11-04	8.83	15.3		2017-11-09	8.41	10.6
2017-11-04	9.29	17.1		2017-11-09	8.32	9.8
2017-11-04	9.44	17.1		2017-11-09	9.31	11.7
2017-11-04	9.34	15.8		2017-11-09	9.65	14.7
2017-11-04	9.24	14.9		2017-11-09	9.55	14.8
2017-11-05	9.15	14.2		2017-11-09	9.25	13.3
2017-11-05	9.06	13.4		2017-11-09	9.05	12
2017-11-05	9.06	12.9		2017-11-10	8.83	11
2017-11-05	9.36	14.6		2017-11-10	8.6	10
2017-11-05	9.81	16.4		2017-11-10	8.42	9.3
2017-11-05	9.98	16.8		2017-11-10	9.41	12.4
2017-11-05	9.86	15.5		2017-11-10	9.18	15.1
2017-11-05	9.75	14.6		2017-11-10	8.15	15.6
2017-11-06	9.66	13.7		2017-11-10	8.19	14.3
2017-11-06	9.57	12.9		2017-11-10	8.33	12.5
2017-11-06	9.55	12.4		2017-11-11	8.4	11.2
2017-11-06	9.75	14		2017-11-11	8.43	9.5
2017-11-06	9.85	16.5		2017-11-11	8.46	8.3
2017-11-06	9.45	17		2017-11-11	9.33	9.8
2017-11-06	9.28	15.7		2017-11-11	9.45	12.4
2017-11-06	9.18	14.9		2017-11-11	8.96	12.4
2017-11-07	9.11	14.1		2017-11-11	8.59	10.9
2017-11-07	9	13.4		2017-11-11	8.48	9.7
2017-11-07	9	13		2017-11-12	8.38	8.5
2017-11-07	9.32	14.9		2017-11-12	8.24	7.4
2017-11-07	9.27	17.4		2017-11-12	8.18	6.6
2017-11-07	9.05	17.6		2017-11-12	9.18	8.6
2017-11-07	8.84	16.9		2017-11-12	9.61	11.6
2017-11-07	8.71	16.2		2017-11-12	9.54	11.9
2017-11-08	8.58	15.7		2017-11-12	9.28	10.7
2017-11-08	8.43	15.2		2017-11-12	9.06	9.5
2017-11-08	8.29	14.7		2017-11-13	8.8	8.3
2017-11-08	8.85	16.5		2017-11-13	8.51	7.3
2017-11-08	9.14	19.6		2017-11-13	8.41	6.6
2017-11-08	9.04	20.2		2017-11-13	9.43	8.4
2017-11-08	8.89	19		2017-11-13	9.8	10.6
2017-11-08	8.73	18		2017-11-13	8.88	11.6
2017-11-09	8.58	16.9		2017-11-13	8.46	10.8
2017-11-09	8.4	15.8		2017-11-13	8.44	9.9
2017-11-09	8.2	15.2		2017-11-14	8.4	9.2
2017-11-09	8.61	17.5		2017-11-14	8.42	8.7
2017-11-09	8.91	20.7		2017-11-14	8.39	8
2017-11-09	8.74	21.4		2017-11-14	8.94	9.8
2017-11-09	8.49	19.7		2017-11-14	8.88	12.3
2017-11-09	8.24	18.4		2017-11-14	8.86	11.8
2017-11-10	7.98	17.2		2017-11-14	8.56	10.4
2017-11-10	7.82	16.2		2017-11-14	8.42	8.9
2017-11-10	7.82	15.5		2017-11-15	8.27	7.9
2017-11-10	8.54	17.7		2017-11-15	8.12	7.1
2017-11-10	8.78	19.5		2017-11-15	8.14	6.5
2017-11-10	8.43	19.6		2017-11-15	9.41	8.2
2017-11-10	7.97	18.9		2017-11-15	9.58	9.1
2017-11-10	7.78	18.1		2017-11-15	9.58	9.3
2017-11-11	7.72	17.2		2017-11-15	9.3	7.6
2017-11-11	7.68	16.2		2017-11-15	9.08	6
2017-11-11	7.78	15.4		2017-11-16	8.97	5.1
2017-11-11	8.75	17.6		2017-11-16	8.86	3.2
2017-11-11	8.96	20.5		2017-11-16	8.84	3.7
2017-11-11	8.7	21		2017-11-16	9.45	10.8
2017-11-11	8.38	19.1		2017-11-16	9.49	12.2
2017-11-11	8.09	17.6		2017-11-16	9	8.3
2017-11-12	7.83	16.2		2017-11-16	8.64	5.2
2017-11-12	7.71	15		2017-11-16	8.17	2.9
2017-11-12	7.62	14.2		2017-11-17	7.99	1.7
2017-11-12	7.76	16.5		2017-11-17	7.91	0.2
2017-11-12	8.3	19.7		2017-11-17	8.27	1
2017-11-12	8.52	20.4		2017-11-17	9.35	10.4
2017-11-12	8.2	18.8		2017-11-17	9.47	7.3
2017-11-12	7.88	17.4		2017-11-17	9.62	8.2
2017-11-13	7.72	16.1		2017-11-17	9.55	6.5
2017-11-13	7.62	15		2017-11-17	9.26	6.4
2017-11-13	7.59	14.3		2017-11-18	8.9	6.3
2017-11-13	8.33	16.1		2017-11-18	8.86	3.6
2017-11-13	8.81	18		2017-11-18	8.97	2.4
2017-11-13	8.57	18.2		2017-11-18	8.73	11.2
2017-11-13	8.19	17.2		2017-11-18	8.44	13.4
2017-11-13	7.93	16.3		2017-11-18	8.58	4.8
2017-11-14	7.78	15.5		2017-11-18	7.44	0.1
2017-11-14	7.69	14.9		2017-11-18	7.57	-1.6
2017-11-14	7.71	14.2		2017-11-19	7.21	-1.4
2017-11-14	8.01	16.4		2017-11-19	7.03	-2.3
2017-11-14	8.61	19.1		2017-11-19	6.86	-1.1
2017-11-14	8.45	18.9		2017-11-19	6.58	11.8
2017-11-14	8.71	11.1		2017-11-19	7	10.5
2017-11-14	8.61	9.4		2017-11-19	7.61	4.1
2017-11-15	8.56	7.5		2017-11-19	7.2	1.5
2017-11-15	8.53	6.7		2017-11-19	7.3	1.7
2017-11-15	8.54	8.2		2017-11-20	7.4	2.4
2017-11-15	9.13	19.8		2017-11-20	7.51	1.9
2017-11-15	9.14	20.5		2017-11-20	7.66	0.9
2017-11-15	8.89	21.2		2017-11-20	7.44	15.1
2017-11-15	7.99	10.3		2017-11-20	7.73	12
2017-11-15	7.96	8.7		2017-11-20	8.19	10.4
2017-11-16	7.95	8.1		2017-11-20	8.1	9.1
2017-11-16	7.97	6.9		2017-11-20	8.09	7.9
2017-11-16	8	7.4		2017-11-21	7.98	6.7
2017-11-16	5.86	28.2		2017-11-21	7.84	5.5
2017-11-16	8.41	19		2017-11-21	7.83	4.4
2017-11-16	8	19.1		2017-11-21	8.18	6.4
2017-11-16	7.74	17.4		2017-11-21	8.39	9.9
2017-11-16	7.69	16.1		2017-11-21	8.5	9.9
2017-11-17	7.68	14.8		2017-11-21	8.31	8.2
2017-11-17	7.66	13.8		2017-11-21	8.04	6.7
2017-11-17	7.74	13		2017-11-22	7.92	5.6
2017-11-17	8.3	14.6		2017-11-22	7.93	5
2017-11-17	8.48	15.8		2017-11-22	7.98	4.5
2017-11-17	8.31	16		2017-11-22	8.15	5.9
2017-11-17	8.02	15.4		2017-11-22	8.08	8.3
2017-11-17	7.89	15		2017-11-22	7.94	9.2
2017-11-18	7.83	14.6		2017-11-22	8.08	8.3
2017-11-18	7.79	13.9		2017-11-22	8.14	7.2
2017-11-18	7.84	13.1		2017-11-23	8.14	5.9
2017-11-18	8.55	14.8		2017-11-23	8.06	4.6
2017-11-18	8.99	17.4		2017-11-23	8.06	3.7
2017-11-18	9.06	17.6		2017-11-23	8.17	5.4
2017-11-18	8.93	15.9		2017-11-23	8.16	7.8
2017-11-18	8.82	14.5		2017-11-23	8.13	8.1
2017-11-19	8.71	13.3		2017-11-23	8.16	6.7
2017-11-19	8.61	12.3		2017-11-23	8.12	5.7
2017-11-19	8.57	11.5		2017-11-24	8.08	4.8
2017-11-19	8.89	13.4		2017-11-24	8.06	4.2
2017-11-19	9.17	16.2		2017-11-24	8.08	3.6
2017-11-19	9.2	16		2017-11-24	8.51	5.2
2017-11-19	9.09	14.7		2017-11-24	8.85	6.8
2017-11-19	9	13.8		2017-11-24	8.85	6.6
2017-11-20	8.91	13.2		2017-11-24	8.66	5.4
2017-11-20	8.83	12.5		2017-11-24	8.47	4.4
2017-11-20	8.78	11.9		2017-11-25	8.33	3.5
2017-11-20	9.03	13.6		2017-11-25	8.24	2.6
2017-11-20	9.11	16.2		2017-11-25	8.2	2
2017-11-20	9.06	16.5		2017-11-25	8.26	3.7
2017-11-20	8.9	15.5		2017-11-25	8.27	6.9
2017-11-20	8.78	14.6		2017-11-25	8.48	7
2017-11-21	8.66	13.5		2017-11-25	8.33	5.9
2017-11-21	8.53	12.5		2017-11-25	8.22	5.3
2017-11-21	8.47	11.8		2017-11-26	8.1	4.6
2017-11-21	8.74	13.8		2017-11-26	8.05	4
2017-11-21	8.96	16.7		2017-11-26	8.03	3.8
2017-11-21	8.82	17.2		2017-11-26	8.38	6
2017-11-21	8.58	15.7		2017-11-26	8.47	8.7
2017-11-21	8.37	14.5		2017-11-26	8.31	9
2017-11-22	8.16	13.5		2017-11-26	8.29	7.8
2017-11-22	7.99	12.8		2017-11-26	8.17	6.6
2017-11-22	7.94	12.3		2017-11-27	8.04	5.4
2017-11-22	8.54	12.9		2017-11-27	7.91	4.4
2017-11-22	8.83	13.6		2017-11-27	7.87	3.8
2017-11-22	8.75	13.4		2017-11-27	7.98	5.5
2017-11-22	8.6	12.7		2017-11-27	8.16	9.5
2017-11-22	8.44	12.2		2017-11-27	8.18	10.2
2017-11-23	8.26	11.6		2017-11-27	8.27	9
2017-11-23	8.12	10.9		2017-11-27	8.3	8.1
2017-11-23	8.1	10.3		2017-11-28	8.33	7.3
2017-11-23	8.75	12.2		2017-11-28	8.31	6.6
2017-11-23	9.08	14.9		2017-11-28	8.28	5.8
2017-11-23	9.04	14.9		2017-11-28	8.48	7
2017-11-23	8.86	13.6		2017-11-28	8.33	9.1
2017-11-23	8.72	12.6		2017-11-28	8.45	9.7
2017-11-24	8.58	11.8		2017-11-28	8.31	8.8
2017-11-24	8.43	11.1		2017-11-28	8.29	8.1
2017-11-24	8.32	10.6		2017-11-29	8.19	7.4
2017-11-24	8.79	12.5		2017-11-29	8.16	7
2017-11-24	8.99	13.7		2017-11-29	8.09	7
2017-11-24	8.98	13.6		2017-11-29	8.51	8.4
2017-11-24	8.83	12.5		2017-11-29	8.97	10.4
2017-11-24	8.7	11.5		2017-11-29	8.54	9.9
2017-11-25	8.57	10.7		2017-11-29	8.35	8.9
2017-11-25	8.42	9.9		2017-11-29	8.46	8
2017-11-25	8.33	9.3		2017-11-30	8.54	7
2017-11-25	8.81	11.2		2017-11-30	8.14	5.9
2017-11-25	9.12	14.1		2017-11-30	8.01	5
2017-11-25	9.12	14.6		2017-11-30	8.02	5.9
2017-11-25	8.98	13.6		2017-11-30	8.4	8
2017-11-25	8.85	12.9
2017-11-26	8.72	12.1
2017-11-26	8.58	11.4
2017-11-26	8.46	11
2017-11-26	8.98	12.9
2017-11-26	9.24	14.7
2017-11-26	9.12	14.7
2017-11-26	8.97	13.7
2017-11-26	8.86	12.7
2017-11-27	8.74	11.8
2017-11-27	8.61	11
2017-11-27	8.54	10.5
2017-11-27	9	12.2
2017-11-27	9.35	14.8
2017-11-27	9.29	15.4
2017-11-27	9.16	14.3
2017-11-27	9.06	13.4
2017-11-28	8.96	12.6
2017-11-28	8.85	11.9
2017-11-28	8.78	11.3
2017-11-28	9.06	12.5
2017-11-28	9.18	14.3
2017-11-28	9.16	14.6
2017-11-28	9.05	13.8
2017-11-28	8.94	13.1
2017-11-29	8.84	12.4
2017-11-29	8.73	12
2017-11-29	8.62	11.9
2017-11-29	9.01	13.6
2017-11-29	9.37	15.8
2017-11-29	9.25	15.5
2017-11-29	9.1	14.8
2017-11-29	8.99	14.2
2017-11-30	8.89	13.6
2017-11-30	8.73	12.9
2017-11-30	8.68	12.3
2017-11-30	8.77	13.8

## Sheet: Fig. 1C, 1D
OPR #1					OPR #3							Harvest day_DW		Harvest day		g DW/m2/day				Dry weight (g/L)		g DW/m2/day
Date	Avg. OD	Avg. DW	Day		Date	Avg. OD	Avg. DW	Day				OPR #1	OPR #3	OPR #1	OPR #3	OPR #1	OPR #3			Average		Average
2017-03-31	0.241	0.15	0		2017-03-31	0.201667	0.144444	0			APR	0.232	0.247	9	15	6.05778	3.86967			OPR #1	OPR #3	OPR #1	OPR #3
2017-04-03	0.263	0.191111	3		2017-04-03	0.261667	0.223333	3				0.28	0.273	15	15	4.38667	4.277		APR	0.256	0.26	5.22222	4.07333
2017-04-06	0.304333	0.232222	6		2017-04-06	0.285667	0.208889	6			MAY	0.301	0.222	9	12	7.85944	4.3475		MAY	0.303	0.2445	9.20852	5.65958
2017-04-09	0.0483333	0.0488889	9		2017-04-09	0.351333	0.246667	9	harvested			0.31	0.267	9	9	8.09444	6.97167		JUN	0.312667	0.487333	9.49574	17.5467
2017-04-12	0.111	0.0866667	12		2017-04-12	0.089	0.0677778	12				0.298		6		11.6717			JUL	0.389333	0.512	13.321	17.6946
2017-04-15	0.218667	0.132222	15		2017-04-15	0.189	0.0855556	15			JUN	0.321	0.354	9	9	8.38167	9.24333		AUG	0.41	0.416	12.1895	14.508
2017-04-18	0.254	0.168	18		2017-04-18	0.238333	0.125556	18				0.311	0.524	9	6	8.12056	20.5233		SEP	0.315	0.246	9.77861	9.635
2017-04-21	0.314	0.273333	21		2017-04-21	0.299667	0.183333	21				0.306	0.584	6	6	11.985	22.8733		OCT	0.252	0.155	5.74118	6.27537
2017-04-24	0.397667	0.28	24	harvested	2017-04-24	0.333667	0.163333	24			JUL	0.357	0.496	6	6	13.9825	19.4267		NOV	0.2185	0.154	4.27896	4.44411
2017-04-27	0.103	0.068	27		2017-04-27	0.457	0.273333	27	harvested			0.443	0.542	9	9	11.5672	14.1522			Stdev		Stdev
2017-04-30	0.186	0.128	30		2017-04-30	0.091	0.0611111	30				0.368	0.498	6	6	14.4133	19.505			OPR #1	OPR #3	OPR #1	OPR #3
2017-05-03	0.325	0.203	33		2017-05-03	0.134	0.0811111	33			AUG	0.488	0.547	9	9	12.7422	14.2828		APR	0.0339411	0.0183848	1.18165	0.288028
2017-05-06	0.415	0.301	36		2017-05-06	0.175	0.118889	36				0.401	0.505	9	6	10.4706	19.7792		MAY	0.006245	0.0318198	2.13638	1.85557
2017-05-09	0.128	0.088	39		2017-05-09	0.231	0.156	39				0.341	0.351	6	6	13.3558	13.7475		JUN	0.00763763	0.119304	2.15971	7.28626
2017-05-12	0.2863	0.169	42		2017-05-12	0.31	0.222222	42	harvested				0.261		6		10.2225		JUL	0.046801	0.026	1.53403	3.06806
2017-05-15	0.351	0.256	45		2017-05-15	0.07	0.0911111	45			SEP	0.357	0.243	6	6	13.9825	9.5175		AUG	0.0739121	0.133332	1.51997	3.94883
2017-05-18	0.425333	0.31	45	harvested	2017-05-18	0.124	0.12	45				0.3	0.288	9	6	7.83333	11.28		SEP	0.0368646	0.0290631	3.64404	1.13831
2017-05-21	0.161	0.1	48		2017-05-21	0.265	0.155556	48				0.288	0.226	9	6	7.52	8.85167		OCT	0.00707107	0.027	1.00164	3.26779
2017-05-24	0.243	0.188	51		2017-05-24	0.513	0.267	51	harvested				0.227		6		8.89083		NOV	0.0346482	0.0691954	0.678528	2.14527
2017-05-27	0.435	0.298	54	harvested	2017-05-27	0.135	0.089	54			OCT	0.247	0.128	9	3	6.44944	10.0267
2017-05-30	0.142	0.097	57		2017-05-30	0.426	0.218	57				0.257	0.182	12	9	5.03292	4.75222
2017-06-02	0.289	0.183	60		2017-06-02	0.642	0.234	60					0.155		9		4.04722
2017-06-05	0.368	0.265	63		2017-06-05	0.712	0.354	63	harvested		NOV	0.243	0.226	12	15	4.75875	3.54067
2017-06-08	0.43	0.321	66	harvested	2017-06-07	0.203	0.103	66				0.194	0.148	12	12	3.79917	2.89833
2017-06-10	0.168	0.128	69		2017-06-10	0.358	0.201	69					0.088		3		6.89333
2017-06-13	0.251667	0.201	72		2017-06-13	0.73	0.524	72	harvested
2017-06-16	0.339	0.268	75		2017-06-16	0.234	0.137	75
2017-06-19	0.418	0.311	78	harvested	2017-06-19	0.421	0.343	78
2017-06-22	0.135	0.102	81		2017-06-22	0.858	0.584	81	harvested
2017-06-25	0.273	0.168	84		2017-06-25	0.288	0.124	84
2017-06-28	0.468	0.306	87	harvested	2017-06-28	0.457	0.323333	87
2017-07-01	0.135	0.104	90		2017-07-01	0.741	0.496	90	harvested
2017-07-04	0.322	0.202	93		2017-07-04	0.265	0.0877778	93
2017-07-07	0.497	0.357	96	harvested	2017-07-07	0.382	0.169	96
2017-07-10	0.161	0.138	99		2017-07-10	0.543	0.284	99
2017-07-13	0.216	0.234	102		2017-07-13	0.81	0.542	102	harvested
2017-07-16	0.268	0.307	105		2017-07-16	0.275	0.087	105
2017-07-19	0.573	0.443	108	harvested	2017-07-19	0.512	0.305	108
2017-07-22	0.21	0.128	111		2017-07-22	0.741	0.498	111	harvested
2017-07-25	0.283	0.214	114		2017-07-25	0.224	0.111	114
2017-07-28	0.538	0.368	117	harvested	2017-07-28	0.342	0.224	117
2017-07-31	0.167	0.087	120		2017-07-31	0.513	0.288889	120
2017-08-03	0.283	0.158	123		2017-08-03	0.754	0.547	123	harvested
2017-08-06	0.415	0.36	126		2017-08-06	0.217	0.125	126
2017-08-09	0.538	0.488	129	harvested	2017-08-09	0.48	0.222222	129
2017-08-11	0.165	0.106	132		2017-08-12	0.786	0.505	132	harvested
2017-08-14	0.298	0.189	135		2017-08-14	0.224	0.128	135
2017-08-17	0.372	0.278	138		2017-08-17	0.412	0.206	138
2017-08-20	0.461	0.401	141	harvested	2017-08-20	0.605	0.351	141	harvested
2017-08-22	0.115333	0.124	144		2017-08-22	0.167	0.068	144
2017-08-25	0.203667	0.188	147		2017-08-25	0.234	0.135	147
2017-08-28	0.253333	0.243	150		2017-08-28	0.512	0.261	150	harvested
2017-08-31	0.493667	0.341	153	harvested	2017-08-31	0.135	0.096	153
2017-09-03	0.168	0.088	156		2017-09-03	0.256	0.148	156
2017-09-06	0.342	0.157	159		2017-09-06	0.487	0.243	159	harvested
2017-09-09	0.607	0.357	162		2017-09-09	0.111	0.068	162
2017-09-12	0.161	0.078	165		2017-09-12	0.248	0.187	165
2017-09-15	0.238	0.153	168		2017-09-15	0.426	0.288	168	harvested
2017-09-18	0.276	0.203	171		2017-09-18	0.098	0.089	171
2017-09-21	0.513	0.3	174	harvested	2017-09-21	0.223	0.201	174
2017-09-24	0.168	0.071	177		2017-09-24	0.453	0.226	177	harvested
2017-09-27	0.217	0.129	180		2017-09-27	0.202667	0.056	180
2017-09-30	0.286	0.204	183		2017-09-30	0.388	0.138	183
2017-10-03	0.458	0.288	186	harvested	2017-10-03	0.401	0.227	186	harvested
2017-10-06	0.107	0.075	189		2017-10-06	0.1	0.051	189
2017-10-09	0.197	0.121	192		2017-10-09	0.28	0.128	192	harvested
2017-10-12	0.261333	0.156	195		2017-10-12	0.067	0.038	195
2017-10-15	0.474	0.247	198	harvested	2017-10-15	0.153	0.086	198
2017-10-18	0.0956667	0.037	201		2017-10-18	0.189	0.156	201
2017-10-21	0.188333	0.099	204		2017-10-21	0.31	0.182	204	harvested
2017-10-24	0.247333	0.138	207		2017-10-24	0.054	0.05	207
2017-10-27	0.298667	0.203	210		2017-10-27	0.104	0.097	210
2017-10-30	0.483333	0.257	213	harvested	2017-10-30	0.154	0.121111	213
2017-11-02	0.087	0.061	216		2017-11-02	0.231	0.155	216
2017-11-05	0.163333	0.1	219		2017-11-05	0.256	0.21	219
2017-11-08	0.249	0.158	222		2017-11-08	0.283	0.226	222	harvested
2017-11-11	0.328	0.209	225		2017-11-11	0.042	0.034	225
2017-11-14	0.377	0.243	228	harvested	2017-11-14	0.0963333	0.0688889	228
2017-11-17	0.078	0.048	231		2017-11-17	0.137	0.1	231
2017-11-20	0.186	0.098	234		2017-11-20	0.156	0.124	234
2017-11-23	0.237	0.132	237		2017-11-23	0.191	0.148	237	harvested
2017-11-26	0.263667	0.167	240		2017-11-26	0.028	0.039	240
2017-11-29	0.321667	0.194	243	harvested	2017-11-29	0.079	0.088	243	harvested

## Sheet: Fig. 1E
OPR #1_Apr				AVG		biomass	volume			AVG	STV	OPR #3_Apr				AVG		biomass	volume							OPR #1		OPR #3
	10	0.042	0.051	0.0465		10	10	100	9.61224	9.61224			10	0.048		0.048		10	10	100	9.91837	9.91837				AVG	STV	AVG	STV
	20	0.087	0.087	0.087		10	20	200	21.4565	10.7283			20	0.106		0.106		10	20	200	25.587	12.7935			APR	10.55	0.59	11.63	1.14
	30	0.143	0.136	0.1395		10	30	300	32.8696	10.9565			30	0.143		0.143		10	30	300	33.6304	11.2101			MAY	14.16	1.57	11.74	0.98
	40	0.184	0.174	0.179		10	40	400	41.4565	10.3641			40	0.218		0.218		10	40	400	49.9348	12.4837			JUN	12.19	0.4	11.21	0.79
	50	0.238	0.248	0.243		10	50	500	55.3696	11.0739			50	0.258		0.258		10	50	500	58.6304	11.7261			JUL	14.67	1.99	13.46	0.89
										10.547	0.588517											11.6264	1.13991		AUG	15.5	1.84	13.25	0.58
OPR #1_May				AVG		biomass	volume					OPR #3_May				AVG		biomass	volume						SEP	15.88	1.39	13.9	1.23
	10	0.079	0.076	0.0775		10	10	100	15.9388	15.9388			10	0.054		0.054		10	10	100	11.1429	11.1429			OCT	13.86	1.01	16.96	0.4
	20	0.1	0.154	0.127		10	20	200	30.1522	15.0761			20	0.108		0.108		10	20	200	26.0217	13.0109			NOV	15.52	1.35	14.35	0.41
	30	0.19	0.193	0.1915		10	30	300	44.1739	14.7246			30	0.162		0.162		10	30	300	37.7609	12.587
	40	0.213	0.239	0.226		10	40	400	51.6739	12.9185			40	0.189		0.189		10	40	400	43.6304	10.9076
	50	0.266	0.27	0.268		10	50	500	60.8043	12.1609			50	0.243		0.243		10	50	500	55.3696	11.0739
										14.1638	1.57002											11.7444	0.977941
OPR #1_Jun				AVG		biomass	volume					OPR #3_Jun				AVG		biomass	volume
	10	0.064	0.059	0.0615		10	10	100	12.6735	12.6735			10	0.045	0.052	0.0485		10	10	100	10.0204	10.0204
	20	0.11	0.093	0.1015		10	20	200	24.6087	12.3043			20	0.1	0.101	0.1005		10	20	200	24.3913	12.1957
	30	0.162	0.154	0.158		10	30	300	36.8913	12.2971			30	0.143	0.15	0.1465		10	30	300	34.3913	11.4638
	40	0.21	0.212	0.211		10	40	400	48.413	12.1033			40	0.188	0.203	0.1955		10	40	400	45.0435	11.2609
	50	0.233	0.276	0.2545		10	50	500	57.8696	11.5739			50	0.241	0.246	0.2435		10	50	500	55.4783	11.0957
										12.1904	0.401676											11.2073	0.785281
OPR #1_Jul				AVG		biomass	volume					OPR #3_Jul				AVG		biomass	volume
	10	0.055	0.119	0.087		10	10	100	17.8776	17.8776			10	0.063	0.056	0.0595		10	10	100	12.2653	12.2653
	20	0.114	0.14	0.127		10	20	200	30.1522	15.0761			20	0.122	0.124	0.123		10	20	200	29.2826	14.6413
	30	0.158	0.185	0.1715		10	30	300	39.8261	13.2754			30	0.183	0.178	0.1805		10	30	300	41.7826	13.9275
	40	0.255	0.248	0.2515		10	40	400	57.2174	14.3043			40	0.234	0.235	0.2345		10	40	400	53.5217	13.3804
	50	0.273	0.294	0.2835		10	50	500	64.1739	12.8348			50	0.286	0.292	0.289		10	50	500	65.3696	13.0739
										14.6736	1.99374											13.4577	0.89397
OPR #1_Aug				AVG		biomass	volume					OPR #3_Aug				AVG		biomass	volume
	10	0.077	0.06	0.0685		10	10	100	14.102	14.102			10	0.05	0.073	0.0615		10	10	100	12.6735	12.6735
	20	0.165	0.155	0.16		10	20	200	37.3261	18.663			20	0.107	0.126	0.1165		10	20	200	27.8696	13.9348
	30	0.207	0.192	0.1995		10	30	300	45.913	15.3043			30	0.172	0.172	0.172		10	30	300	39.9348	13.3116
	40	0.266	0.238	0.252		10	40	400	57.3261	14.3315			40	0.234	0.246	0.24		10	40	400	54.7174	13.6793
	50	0.354	0.317	0.3355		10	50	500	75.4783	15.0957			50	0.276	0.282	0.279		10	50	500	63.1957	12.6391
										15.4993	1.8389											13.2477	0.583649
OPR #1_Sep				AVG		biomass	volume					OPR #3_Sep				AVG		biomass	volume
	10	0.086	0.08	0.083		10	10	100	17.0612	17.0612			10	0.058	0.056	0.057		10	10	100	11.7551	11.7551
	20	0.172	0.127	0.1495		10	20	200	35.0435	17.5217			20	0.105	0.135	0.12		10	20	200	28.6304	14.3152
	30	0.216	0.195	0.2055		10	30	300	47.2174	15.7391			30	0.196	0.191	0.1935		10	30	300	44.6087	14.8696
	40	0.273	0.241	0.257		10	40	400	58.413	14.6033			40	0.23	0.269	0.2495		10	40	400	56.7826	14.1957
	50	0.338	0.305	0.3215		10	50	500	72.4348	14.487			50	0.303	0.334	0.3185		10	50	500	71.7826	14.3565
										15.8825	1.38573											13.8984	1.22565
OPR #1_Oct				AVG		biomass	volume					OPR #3_Oct				AVG		biomass	volume
	10	0.06	0.059	0.0595		10	10	100	12.2653	12.2653			10	0.083	0.08	0.0815		10	10	100	16.7551	16.7551
	20	0.135	0.114	0.1245		10	20	200	29.6087	14.8043			20	0.148	0.153	0.1505		10	20	200	35.2609	17.6304
	30	0.168	0.205	0.1865		10	30	300	43.087	14.3623			30	0.227	0.218	0.2225		10	30	300	50.913	16.971
	40	0.255	0.25	0.2525		10	40	400	57.4348	14.3587			40	0.299	0.299	0.299		10	40	400	67.5435	16.8859
	50	0.307	0.29	0.2985		10	50	500	67.4348	13.487			50	0.376	0.363	0.3695		10	50	500	82.8696	16.5739
										13.8555	1.00932											16.9633	0.401899
OPR #1_Nov				AVG		biomass	volume					OPR #3_Nov				AVG		biomass	volume
	10	0.07	0.067	0.0685		10	10	100	14.102	14.102			10	0.07	0.065	0.0675		10	10	100	13.898	13.898
	20	0.148	0.154	0.151		10	20	200	35.3696	17.6848			20	0.124	0.125	0.1245		10	20	200	29.6087	14.8043
	30	0.207	0.186	0.1965		10	30	300	45.2609	15.087			30	0.199	0.185	0.192		10	30	300	44.2826	14.7609
	40	0.271	0.256	0.2635		10	40	400	59.8261	14.9565			40	0.26	0.238	0.249		10	40	400	56.6739	14.1685
	50	0.328	0.375	0.3515		10	50	500	78.9565	15.7913			50	0.329	0.298	0.3135		10	50	500	70.6957	14.1391
										15.5243	1.34865											14.3542	0.405252

## Sheet: Fig. 1F
OPR#1	N	C	H	S	Ash	O	CV		OPR#3	N	C	H	S	Ash	O	CV			OPR #1		OPR #3
Apr	5.35007	39.6216	5.34258	0.435495	17.11	32.1403	16.8142		Apr	5.62843	38.3776	5.40045	0.50823	20.4	29.6853	16.8339			AVG	STV	AVG	STV
	5.45765	40.2391	5.44928	0.441795	16.88	31.5322	17.2525			5.87115	38.8981	5.47908	0.498556	19.88	29.3732	17.1582		APR	17.0334	0.30989	16.996	0.22933
AVG	5.40386	39.9303	5.39593	0.438645	16.995	31.8362	17.0334		AVG	5.74979	38.6378	5.43976	0.503393	20.14	29.5292	16.996		MAY	18.6294	0.05477	17.1835	0.62098
STV	0.0760707	0.436614	0.0754486	0.00445494	0.162635	0.429954	0.309887		STV	0.171629	0.36802	0.0555981	0.00684016	0.367696	0.220711	0.229333		JUN	19.8137	0.09567	17.6574	0.07303
May	6.26204	41.6315	5.95801	0.437962	15.34	30.3705	18.5907		May	5.35728	38.6531	5.21905	0.424439	21.28	29.0661	16.7444		JUL	19.4461	0.0341	18.7987	0.60393
	6.10515	41.6878	5.95793	0.449446	15.85	29.9496	18.6681			5.60828	39.6279	5.40072	0.432909	22.04	26.8901	17.6226		AUG	20.8062	0.49328	20.9117	0.07971
AVG	6.1836	41.6597	5.95797	0.443704	15.595	30.16	18.6294		AVG	5.48278	39.1405	5.30989	0.428674	21.66	27.9781	17.1835		SEP	19.3474	0.03029	19.5128	0.27392
STV	0.11094	0.0398352	5.5971e-05	0.00812096	0.360624	0.297585	0.0547672		STV	0.177485	0.689315	0.128463	0.00598951	0.537401	1.53865	0.620982		OCT	21.0362	0.11446	20.4703	0.22237
Jun	6.99307	43.4973	6.29553	0.471889	13.8	28.9422	19.8813		Jun	5.3109	40.4246	5.6602	0.406291	16.64	31.558	17.6058		NOV	19.9605	0.19463	15.9216	0.37565
	7.02818	43.7545	6.20105	0.473196	12.98	29.5631	19.746			5.53168	40.7169	5.68053	0.42511	15.92	31.7258	17.709
AVG	7.01063	43.6259	6.24829	0.472542	13.39	29.2526	19.8137		AVG	5.42129	40.5707	5.67037	0.4157	16.28	31.6419	17.6574
STV	0.0248248	0.181818	0.0668108	0.00092388	0.579828	0.439072	0.0956671		STV	0.156115	0.206702	0.0143775	0.013307	0.509117	0.118616	0.0730331
Jul	5.64724	42.617	6.20014	0.378839	16.37	28.7868	19.4702		Jul	5.70312	41.2825	5.80476	0.449427	17.2	29.5602	18.3716
	5.72396	42.4558	6.22729	0.415529	16.12	29.0574	19.422			5.83112	42.3454	6.00748	0.429906	17.42	27.9661	19.2257
AVG	5.6856	42.5364	6.21371	0.397184	16.245	28.9221	19.4461		AVG	5.76712	41.814	5.90612	0.439666	17.31	28.7631	18.7987
STV	0.0542504	0.113976	0.0192011	0.0259443	0.176777	0.191357	0.0341014		STV	0.0905061	0.751581	0.143341	0.0138034	0.155563	1.12719	0.60393
Aug	5.37393	46.1847	6.6947	0.491825	11.04	30.2149	21.155		Aug	6.87898	45.8324	6.39387	0.537077	12.69	27.6677	20.9681
	5.30909	45.3417	6.52473	0.445114	10.89	31.4894	20.4574			6.90663	45.5971	6.37284	0.529169	12.89	27.7042	20.8554
AVG	5.34151	45.7632	6.60972	0.468469	10.965	30.8521	20.8062		AVG	6.8928	45.7148	6.38335	0.533123	12.79	27.686	20.9117
STV	0.0458463	0.596076	0.120191	0.0330296	0.106066	0.901209	0.493279		STV	0.0195504	0.166343	0.0148697	0.00559162	0.141421	0.0258328	0.0797074
Sep	5.97426	42.5516	6.48517	0.450796	11.88	32.6582	19.326		Sep	5.99424	43.1252	6.55967	0.469318	11.81	32.0416	19.7065
	5.95843	42.7651	6.48928	0.432274	11.47	32.8849	19.3689			5.95754	42.819	6.39299	0.417511	12.04	32.373	19.3191
AVG	5.96635	42.6583	6.48723	0.441535	11.675	32.7716	19.3475		AVG	5.97589	42.9721	6.47633	0.443414	11.925	32.2073	19.5128
STV	0.0111959	0.150979	0.00290544	0.0130967	0.289914	0.160322	0.0302929		STV	0.025951	0.216499	0.117865	0.0366335	0.162635	0.234313	0.273921
Oct	7.0845	46.0837	6.49909	0.545977	10.34	29.4467	20.9553		Oct	5.53139	44.9266	6.35243	0.426094	13	29.7635	20.3131
	7.24176	46.0313	6.58251	0.553056	10.58	29.0114	21.1172			5.61588	45.2497	6.45978	0.43382	12.88	29.3608	20.6276
AVG	7.16313	46.0575	6.5408	0.549517	10.46	29.2291	21.0362		AVG	5.57363	45.0881	6.40611	0.429957	12.94	29.5622	20.4703
STV	0.111201	0.0370865	0.0589924	0.00500578	0.169706	0.307818	0.114465		STV	0.0597416	0.228462	0.0759082	0.00546288	0.0848528	0.284721	0.222372
Nov	7.0831	43.5837	6.47093	0.465739	13.02	29.3765	20.0981		Nov	4.0354	38.251	5.33066	0.286546	18.89	33.2064	16.1873
	7.04904	43.3164	6.34572	0.444346	13.41	29.4345	19.8228			3.93882	37.5675	5.20764	0.317249	18.78	34.1888	15.656
AVG	7.06607	43.4501	6.40833	0.455042	13.215	29.4055	19.9604		AVG	3.98711	37.9093	5.26915	0.301898	18.835	33.6976	15.9216
STV	0.0240834	0.188982	0.0885381	0.0151275	0.275772	0.0409597	0.194633		STV	0.0682963	0.483301	0.0869921	0.0217104	0.0777817	0.694661	0.375652

## Sheet: Fig. 1G
	OPR #1	OPR #3
Day	Avg. OD
0	0.241	0.201667
3	0.263	0.261667
6	0.304333	0.285667
9	0.0483333	0.351333
12	0.111	0.089
15	0.218667	0.189
18	0.254	0.238333
21	0.314	0.299667
24	0.397667	0.333667
27	0.103	0.457
30	0.186	0.091
33	0.325	0.134
36	0.415	0.175
39	0.128	0.231
42	0.2863	0.31
45	0.351	0.07
45	0.425333	0.124
48	0.161	0.265
51	0.243	0.513
54	0.435	0.135
57	0.142	0.426
60	0.289	0.642
63	0.368	0.712
66	0.43	0.203
69	0.168	0.358
72	0.251667	0.73
75	0.339	0.234
78	0.418	0.421
81	0.135	0.858
84	0.273	0.288
87	0.468	0.457
90	0.135	0.741
93	0.322	0.265
96	0.497	0.382
99	0.161	0.543
102	0.216	0.81
105	0.268	0.275
108	0.573	0.512
111	0.21	0.741
114	0.283	0.224
117	0.538	0.342
120	0.167	0.513
123	0.283	0.754
126	0.415	0.217
129	0.538	0.48
132	0.165	0.786
135	0.298	0.224
138	0.372	0.412
141	0.461	0.605
144	0.115333	0.167
147	0.203667	0.234
150	0.253333	0.512
153	0.493667	0.135
156	0.168	0.256
159	0.342	0.487
162	0.607	0.111
165	0.161	0.248
168	0.238	0.426
171	0.276	0.098
174	0.513	0.223
177	0.168	0.453
180	0.217	0.202667
183	0.286	0.388
186	0.458	0.401
189	0.107	0.1
192	0.197	0.28
195	0.261333	0.067
198	0.474	0.153
201	0.0956667	0.189
204	0.188333	0.31
207	0.247333	0.054
210	0.298667	0.104
213	0.483333	0.154
216	0.087	0.231
219	0.163333	0.256
222	0.249	0.283
225	0.328	0.042
228	0.377	0.0963333
231	0.078	0.137
234	0.186	0.156
237	0.237	0.191
240	0.263667	0.028
243	0.321667	0.079

## Sheet: Fig. 1H
OPR #1	TN				TP						OPR #3	TN				TP							TN		TP
	Initially day	Harvest day	Consumption		Initially day	Harvest day	Consumption					Initially day	Harvest day	Consumption		Initially day	Harvest day	Consumption					OPR #1	OPR #3	OPR #1	OPR #3
Apr	15.18	3.43	11.75	11.37	1.85	0.16	1.69	1.775			Apr	15.15	1.45	13.7	12.58	2.25	0.04	2.21	2.07			APR	11.37	12.58	1.775	2.07
	14.55	3.56	10.99		2.04	0.18	1.86					13.66	2.2	11.46		1.97	0.04	1.93				MAY	12.86	12.11	2.22333	2.03
May	15.79	3.06	12.73	12.86	2.32	0.06	2.26	2.22333			May	14.76	5.84	8.92	12.11	2.19	0.29	1.9	2.03			JUN	13.57	16.6925	2.57333	2.35
	14.19	0.97	13.22		2.38	0.12	2.26					15.88	0.58	15.3		2.55	0.39	2.16				JUL	13.98	14.38	2.59333	2.53667
	14.5	1.87	12.63		2.18	0.03	2.15				Jun	21.3	0.5	20.8	16.6925	2.57	0.32	2.25	2.35			AUG	14	14.4567	2.62	2.39667
Jun	16.2	1.03	15.17	13.57	3.18	0.11	3.07	2.57333				15.58	0	15.58		2.35	0.11	2.24				SEP	12.075	12.1925	2.11	2.0225
	16.62	2.01	14.61		2.64	0.08	2.56					16.03	1.56	14.47		2.48	0.03	2.45				OCT	13.2133	12.71	2.12333	1.925
	12.79	1.86	10.93		2.1	0.01	2.09					17.48	1.56	15.92		2.47	0.01	2.46				NOV	11.875	10.015	2.08	1.47
Jul	16.29	2.22	14.07	13.98	2.68	0.07	2.61	2.59333			Jul	15.81	1.9	13.91	14.38	2.83	0.05	2.78	2.53667
	16.64	2.66	13.98		2.64	0.03	2.61					15.2	1.34	13.86		2.25	0.02	2.23
	16.94	3.05	13.89		2.59	0.03	2.56					16.61	1.24	15.37		2.6	0	2.6
Aug	12.64	0.46	12.18	14	2.28	0.01	2.27	2.62			Aug	13.5	0.58	12.92	14.4567	2.42	0.03	2.39	2.39667
	14.97	0.77	14.2		2.48	0.02	2.46					15.09	1.02	14.07		2.38	0	2.38
	16.85	1.23	15.62		3.21	0.08	3.13					17.57	1.19	16.38		2.58	0.16	2.42
Sep	15.64	2.88	12.76	12.075	2.14	0.12	2.02	2.11			Sep	16.58	1.52	15.06	12.1925	2.63	0.42	2.21	2.0225
	14.82	3.43	11.39		2.31	0.11	2.2					15.57	3.61	11.96		2.52	0.41	2.11
Oct	15.28	1.24	14.04	13.2133	2.24	0.03	2.21	2.12333				14.48	2.85	11.63		2.24	0.21	2.03
	15.34	3.3	12.04		2.15	0.16	1.99					12.52	2.4	10.12		1.97	0.23	1.74
	15.67	2.11	13.56		2.26	0.09	2.17				Oct	13.15	0	13.15	12.71	2.12	0.38	1.74	1.925
Nov	14.44	1.26	13.18	11.875	1.56	0.15	1.41	2.08				12.27	0	12.27		2.19	0.08	2.11
	13.61	3.04	10.57		2.78	0.03	2.75				Nov	14.9	0	14.9	10.015	2.12	0.02	2.1	1.47
												14.67	9.54	5.13		2.48	1.64	0.84

## Sheet: Fig. 3
	Desmodesmus sp.	Pseudopediastrium integrum	Tetradesmus obliqus	Chlorella sp.	Chlorella miniata	Others
OPR#1
APR	73.89	0.01	1.24	0.74	0	24.12
MAY	91.71	0.01	2	0.58	0	5.7
JUN	77.42	0.03	0.14	2.27	0	20.14
JUL	39.82	5.54	0.62	6.1	0	47.92
AUG	28.22	1.96	0.34	2.33	0	67.15
SEP	76.94	0.02	0	0	0.82	22.22
OCT	75.63	0.01	0	0	2.97	21.39
NOV	57.09	0	0	0	0.54	42.37
OPR#3
APR	90.77	0.01	6.4	0.35	0	2.47
MAY	89.28	0	2.95	0.1	0	7.67
JUN	81.9	0	0.3	0.12	0	17.68
JUL	64.71	0.09	0.09	0.04	0	35.07
AUG	59.63	0.82	0.03	0.05	0	39.47
SEP	66.78	0.44	0	0	0.43	32.35
OCT	72.07	0.02	0	0	0.16	27.75
NOV	73.08	0.07	0	0	0.09	26.76

## Sheet: Fig. 4
																				OPR#1
OPR #1	APR									OPR #3	APR										APR	MAY	JUN	JUL	AUG	SEP	OCT	NOV			APR	MAY	JUN	JUL	AUG	SEP	OCT	NOV
RT	composition	quality	%		RT	composition	quality	%		RT	composition	quality	%		RT	composition	quality	%		C14:0	6.841		9.253	4.516	2.756	3.469	4.849	3.392			7.86593	0	10.6198	5.22383	3.09628	4.74815	6.91825	4.21157
12.068	heptadecane	97	1.211		15.329	C14:0	99	6.841		12.068	Heptadecane	91	0.75		17.463	C16:0	98	19.703		C15:0	1.614	1.435	1.042	0.975	1.477	1.579	1.961				1.85581	1.8414	1.19591	1.12782	1.65936	2.16124	2.79783	0
14.562	4-Pyrimidina	58	0.491		15.867	C15:0	93	1.614		14.554	4-Pyrimidinamine	53	0.446		17.806	C16:1	81	7.235		C16:0	22.695	18.32	21.413	23.899	25.156	16.631	14.954	17.907			26.0952	23.5083	24.5759	27.6449	28.262	22.7635	21.3354	22.2337
14.897	Silne	64	0.639		17.471	C16:0	99	22.695		14.792	Neophytadiene	49	0.383		19.296	C17:3	87	1.202		C16:1	21.506	12.799	20.066	9.137	6.413	6.439	11.43	13.079			24.7281	16.4237	23.03	10.5691	7.20481	8.8133	16.3076	16.2391
15.329	Myristic acid, methyl ester	99	6.841		17.806	C16:1	99	21.506		14.897	2-(2-FLUORO	64	1.019		19.799	C16:4	95	10.087		C16:2		0.777	1.018	1.376	2.214	1.428	1.716	1.085			0	0.997049	1.16837	1.59167	2.48736	1.95456	2.44828	1.34716
15.558	2H	47	1.211		19.807	C16:4	93	3.57		14.994	Acetic acid,	38	0.323		20.539	C18:0	99	2.405		C16:3					1.888						0	0	0	0	2.12111	0	0	0
15.867	Pentadecanoic acid, methyl ester	93	1.614		20.548	C18:0	98	2.161		15.038	Octadecane, 1,1	59	0.529		20.954	C18:1	99	11.192		C16:4	3.57	5.3	2.888	4.327	4.826	7.724	3.905	5.856			4.10486	6.80098	3.31459	5.00521	5.42186	10.5721	5.57141	7.27092
16.211	1,1	39	0.619		20.962	C18:1	99	14.761		15.338	E-2,4-Phytadiene	43	1.493		21.967	C18:2	99	3.26		C17:0				0.481	0.637						0	0	0	0.556391	0.71565	0	0	0
16.343	Pentadecanoic acid, methyl ester	94	0.652		21.976	C18:2	99	2.706		15.559	4-Methylthiazole	64	0.867		23.625	C18:3	99	18.462		C17:3						1.458	1.084	2.361			0	0	0	0	0	1.99562	1.54658	2.93146
16.643	1-Unce	38	0.673		23.633	C18:3	99	8.166		15.867	Pentadecanoic acid, methyl ester	46	1.09		24.533	C18:4	76	2.539		C18:0	2.161	1.806	1.987	2.34	3.325	2.649	2.345	1.63			2.48476	2.31746	2.2805	2.70677	3.73554	3.62579	3.3457	2.02384
16.986	CYCLO	38	0.671		24.532	C18:4	64	1.308		16.211	1-Bromo-2-nitrobenzene	38	1.04					76.085		C18:1	14.761	15.495	14.821	20.392	21.173	10.351	8.268	7.026			16.9725	19.8832	17.0102	23.5882	23.7872	14.1678	11.7963	8.72362
17.471	Hexadecanoic acid, methyl ester	99	22.695		33.965	C20:5	76	1.643		16.343	Octacosanoic acid, methyl ester	43	0.739							C18:2	2.706	4.48	3.912	5.49	7.729	5.513	5.757	4.044			3.11142	5.74875	4.48984	6.35049	8.68329	7.54585	8.21373	5.02111
17.639	Malonic acid, 2-decyl isohexyl ester	38	0.457				total	86.971		16.643	Pentaethylene glycol	27	0.39							C18:3	8.166	16.041	9.376	11.563	9.68	13.044	9.747	16.108			9.38944	20.5839	10.7609	13.3754	10.8752	17.8538	13.9064	20
17.736	9-Hexadecenoic acid, methyl ester, (Z)-	76	1.407							16.978	3-Methyl	35	0.918							C18:4	1.308	1.472	1.353	1.95	1.731		1.423	2.449			1.50397	1.88887	1.55285	2.25564	1.94473	0	2.03025	3.04073
17.806	9-Hexadecenoic acid, methyl ester, (Z)-	99	20.099	21.506						17.463	Hexadecanoic acid, methyl ester	98	19.703							C20:4								1.246			0	0	0	0	0	0	0	1.54706
18.124	1,4-BENZEN	46	2.168			`				17.63	Ethanol, 2	59	0.555							C20:5	1.643						2.648	4.359			1.88916	0	0	0	0	0	3.778	5.41222
18.274	Methyl 5,9,12-octadecatrienoate	58	0.51							17.718	9-Hexadecenoic acid, methyl ester	41	0.655							C24:0						2.777					0	0	0	0	0	3.80099	0	0
18.335	Cyclohexene	35	0.59							17.806	9-Hexadecenoic acid, methyl ester	81	1.227	7.235						total	86.971	77.925	87.129	86.446	89.005	73.062	70.087	80.542			100.001	99.9936	99.9989	99.9954	99.9944	100.003	99.9957	100.002
18.529	Tetratriacontane	80	0.711							18.124	9-Hexadecenoic acid, methyl ester	49	5.353
18.608	3-(3-Methoxy-2,3-dihydro	64	0.467							18.529	Docosane	64	0.37							OPR#3
18.75	Acetic acid	50	0.27							19.296	methyl 8,11,14-heptadecatrienoate	87	1.202								APR	MAY	JUN	JUL	AUG	SEP	OCT	NOV			APR	MAY	JUN	JUL	AUG	SEP	OCT	NOV
19.305	Methyl 8,11,14,17-eicosatetraenoate	72	0.83							19.605	2-Ethylbutyric acid	40	1.597							C14:0		5.579	5.411	3.022	3.272	3.14	1.346	0.713			0	7.27569	6.95949	3.78697	4.7215	4.31082	1.59215	0.832555
19.613	Dimethyl 3,6,9,12	53	0.858							19.799	Methyl 4,7,10,13-hexadecatetraenoate	95	10.087							C15:0		2.113	0.59	0.701	0.534	1.586	0.871				0	2.75561	0.758842	0.878446	0.770563	2.17738	1.03028	0
19.807	Methyl 4,7,10,13-hexadecatetraenoate	93	3.57							20.539	Octadecanoic acid, methyl ester	99	2.405							C16:0	19.703	22.414	22.551	23.244	17.099	16.704	13.709	14.131			25.8943	29.2306	29.0045	29.1278	24.6739	22.9325	16.216	16.5005
20.548	Octadecanoic acid, methyl ester	98	2.161							20.954	9-Octadecenoic acid, methyl ester	99	8.877	11.192						C16:1	7.235	12.257	11.094	6.504	6.972	6.506	4.804	4.183			9.50848	15.9846	14.2688	8.15038	10.0606	8.93191	5.68252	4.8844
20.962	9-Octadecenoic acid, methyl ester, (Z)-	99	11.684	14.761						21.103	9-Octadecenoic acid, methyl ester	99	2.315							C16:2		4.059		1.473	1.651	1.411	0.996	0.555			0	5.29343	0	1.84586	2.3824	1.93712	1.17814	0.648062
21.112	9-Octadecenoic acid, methyl ester, (Z)-	91	3.077							21.967	9,12-Octadecadienoic acid, methyl ester	99	3.26							C16:3				1.439			1.468	1.38			0	0	0	1.80326	0	0	1.73646	1.6114
21.976	9,12-Octadecadienoic acid (Z,Z)-	99	2.706							23.625	9,12,15-Octadecatrienoic acid, methyl ester	99	18.462							C16:4	10.087		3.734	4.863	6.264	7.173	7.708	7.996			13.2567	0	4.80257	6.09398	9.03896	9.84761	9.11758	9.33676
23.633	9,12,15-Octadecatrienoic acid, methyl ester, (Z,Z,Z)-	99	8.166							24.533	Methyl stearidonate	76	2.539							C17:0				0.612		0.474					0	0	0	0.766917	0	0.650741	0	0
24.532	Methyl stearidonate	64	1.308							35.19	Docosanoic acid, methyl ester	64	1.74							C17:3	1.202					1.515					1.57971	0	0	0	0	2.0799	0	0
33.965	Methyl eicosa-5,8,11,14,17-pentaenoate	76	1.643							49.189	Tetracosanoic acid, methyl ester	59	0.241							C18:0	2.405	3.088	2.895	2.807	2.713	2.985	1.974	1.319			3.16073	4.02713	3.72347	3.51754	3.91486	4.09802	2.33499	1.54017
			99.999							49.938	1,4,7,10,13,16-Hexaoxacyclooctadecane	83	0.881							C18:1	11.192	16.088	22.083	19.315	11.67	10.479	21.139	26.698			14.7089	20.9807	28.4026	24.2043	16.8398	14.3863	25.0047	31.1747
										52.433	1,4,7,10,13,16-Hexaoxacyclooctadecane	46	5.291							C18:2	3.26	2.823	2.698	5.665	6.424	5.544	5.888	3.709			4.2844	3.68153	3.4701	7.099	9.26984	7.6112	6.96475	4.33092
OPR #1	MAY									55.377	1,4,7,10,13,16-Hexaoxacyclooctadecane	59	3.26							C18:3	18.462	7.787	6.69	10.154	12.6994	12.825	22.864	21.316			24.2634	10.1552	8.6045	12.7243	18.3253	17.6071	27.0452	24.8902
RT	composition	quality	%		RT	composition	quality	%					100.007							C18:4	2.539					1.445	1.775	2.312			3.33684	0	0	0	0	1.9838	2.0996	2.69967
12.068	Hepta	96	1.974		15.329	C14:0	99	6.794												C22:0								1.325			0	0	0	0	0	0	0	1.54717
14.051	2,2,4	40	0.174		15.867	C15:0	91	1.435		OPR #3	MAY									C24:0		0.472				1.05					0	0.615545	0	0	0	1.44152	0	0
14.554	1-(4	53	0.336		17.463	C16:0	99	18.32		RT	composition	quality	%		RT	composition	quality	%		total	76.085	76.68	77.746	79.799	69.2984	72.837	84.542	85.637			99.9934	100	99.9949	99.9987	99.9977	99.9959	100.002	99.9965
14.897	3-Flu	59	0.742		17.806	C16:1	99	12.799		12.068	Heptadecane	95	1.094		15.329	C14:0	99	5.579
15.329	Myristic acid, methyl ester	99	6.794		18.327	C16:2	78	0.777		14.897	4-[2-(3,5	64	0.481		15.858	C15:0	95	2.113
15.559	2-Methyl	59	1.55		19.799	C16:4	90	5.3		15.329	Myristic acid, methyl ester	99	5.579		17.463	C16:0	99	22.414
15.867	Pentadecanoic acid, methyl ester	91	1.435		20.548	C18:0	99	1.806		15.55	Phophonofluoridic acid	59	1.494		17.807	C16:1	99	12.257
16.202	Octadecane	35	0.719		20.962	C18:1	99	15.495		15.858	Pentadecanoic acid, methyl ester	95	2.113		19.799	C16:4	87	4.059
16.343	1,4,10,13-tetrao	50	0.587		21.976	C18:2	99	4.48		16.211	1-Pyrrolidinecarboxylic acid,	38	0.779		20.539	C18:0	98	3.088
16.643	Octaethylene glycol monododecyl ether	38	0.789		23.625	C18:3	99	16.041		16.343	Myristic acid, methyl ester	53	0.607		20.954	C18:1	99	16.088
16.978	15-Crown-5	27	0.675		24.532	C18:4	64	1.472		16.978	Cyclo	22	0.516		21.967	C18:2	99	2.823
17.463	Hexadecanoic acid, methyl ester	99	18.32					84.719		17.463	Hexadecanoic aicd, methyl ester	99	22.414		23.625	C18:3	99	7.787
17.727	9-Hexadecenoic acid, methyl ester, (Z)-	91	1.551							17.727	9-Hexadecenoic acid, methyl ester	64	1.474		49.189	C24:0	45	0.472
17.806	9-Hexadecenoic acid, methyl ester, (Z)-	99	12.799	14.35						17.807	9-Hexadecenoic acid, methyl ester	99	10.783	12.257				76.68
18.124	1,4-BENZEN	45	2.711							18.115	1,4-Benzenedicarboxylic acid,	93	2.631
18.327	7,10-Hexadecadienoic acid, methyl ester	78	0.777							19.296	methyl 8,11,14-heptadecatrienoate	64	1.082
18.529	pentadecane	64	1.057							19.614	Dimethyl 3,6,9,12-tetraoxatet	50	1.071
18.758	3,6,9,12,15-pentaoxanonadecan-1-=ol	64	0.308							19.799	Methyl 4,7,10,13-hexadecatetraenoate	87	4.059
19.296	Methyl 8,11,14-Heptadecatrienoate	72	1.117							20.539	Octadecanoic acid, methyl ester	98	3.088
19.614	1,3-OXAZI	38	0.992							20.954	9-Octadecenoic acid, methyl ester	99	12.106	16.088
19.799	Methyl 4,7,10,13-hexadecatetraenoate	90	5.3							21.103	9-Octadecenoic acid, methyl ester	91	3.982
20.548	Octadecanoic acid, methyl ester	99	1.806							21.967	9,12-Octadecadienoic acid, methyl ester	99	2.823
20.962	9-Octadecenoic acid, methyl ester	99	12.979	15.495						23.625	9,12,15-Octadecatrienoic acid, methyl ester	99	7.787
21.103	9-Octadecenoic acid, methyl ester	90	2.516							35.155	2,6-Di-O-methyl-d-	50	1.659
21.976	9,12-Octadecadienoic acid, methyl ester	99	4.48							49.189	Tetracosanoic acid, methyl ester	45	0.472
23.625	9,12,15-Octadecatrienoic acid, methyl ester	99	16.041							52.433	1,4,7,10,13,16-Hexaoxacyclooctadecane	53	6.601
24.532	Methyl stearidonate	64	1.472							55.395	1,4,7,10,13,16-Hexaoxacyclooctadecane	72	5.305
			100.001										100
OPR #1	JUN									OPR #3	JUN
RT	composition	quality	%		RT	composition	quality	%		RT	composition	quality	%		RT	composition	quality	%
12.068	Heptadecane	98	2.729		15.329	C14:0	99	9.253		12.068	Heptadecane	96	1.628		15.329	C14:0	99	5.411
14.554	Cyclopropane	53	0.289		15.867	C15:0	93	1.042		14.897	1-(4-	59	0.576		16.334	C15:0	76	0.59
14.897	4-[2-(3,5	64	0.594		17.463	C16:0	99	21.413		15.038	Cyclo	36	0.51		17.463	C16:0	99	22.551
15.329	Myristic acid, methyl ester	99	9.253		17.806	C16:1	99	20.066		15.329	Myristic acid, methyl ester	99	5.411		17.806	C16:1	99	11.094
15.559	7-Oxa-2,2-	64	0.967		18.327	C16:2	46	1.018		15.55	2-Methylthiomethyl	56	1.023		19.799	C16:4	95	3.734
15.717	METHYL	22	0.401		19.799	C16:4	90	2.888		15.858	Methyl 9-methyltetra	93	1.472		20.539	C18:0	99	2.895
15.867	Pentadecanoic acid, methyl ester	93	1.042		20.548	C18:0	98	1.987		16.211	1,1,3	42	0.839		20.954	C18:1	99	22.083
16.202	Methoxyacetic acid,	43	0.517		20.962	C18:1	99	14.821		16.334	Pentadecanoic acid, methyl ester	76	0.59		21.967	C18:2	99	2.698
16.343	Methyl 9-methyltetradecanoate	72	0.4		21.976	C18:2	99	3.912		16.634	Octaethylene	35	0.79		23.616	C18:3	99	6.69
16.643	ethanol, 2,2'-[1,4	40	0.517		23.625	C18:3	99	9.376		16.978	2-ISOPROPYL	27	0.645					77.746
16.978	Cyclohexene,3-propyl-	43	0.6		24.541	C18:4	81	1.353		17.463	Hexadecanoic acid, methyl ester	99	22.551
17.463	Hexadecanoic acid, methyl ester	99	21.413					87.129		17.727	methyl 11-hexadecenoate	76	1.395
17.727	9-Hexadecenoic acid, methyl ester,	76	1.624							17.806	9-Hexadecenoic acid, methyl ester	99	9.699	11.094
17.806	9-Hexadecenoic acid, methyl ester,	99	18.442	20.066						18.124	1,4-Benzendicarboxylic acid	86	2.78
18.124	2-Naphthalenol,	90	1.822							18.327	(1R*,3R*,6S*)	42	0.901
18.327	9,12-Hexadecadienoic acid, methyl ester	46	1.018							18.529	Heptadecane	43	0.735
18.529	Heneicosane	80	1.419							18.741	12-Crown-4	47	0.399
18.75	2-(bromomethyl)	43	0.477							18.82	Heptadecanoic acid, methyl ester	59	0.517
19.296	Methyl 8,11,14-heptadecatrienoate	62	1.202							19.296	methyl 8,11,14-heptadecatrienoate	86	0.911
19.614	d-Ribose, 2-	47	0.937							19.614	Tetrahydro	47	0.722
19.799	Methyl 4,7,10,13-hexadecatetraenoate	90	2.888							19.799	Methyl 4,7,10,13-hexadecatetraenoate	95	3.734
20.548	Octadecenoic acid, methyl ester	98	1.987							20.539	Octadecanoic acid, methyl ester	99	2.895
20.962	9-Octadecenoic acid, methyl ester	99	10.881	14.821						20.954	9-Octadecenoic acid, methyl ester	99	17.891	22.083
21.103	9-Octadecenoic acid, methyl ester	99	3.94							21.103	9-Octadecenoic acid, methyl ester	99	4.192
21.976	10,13-Octadecadienoic acid, methyl ester	99	3.912							21.967	9,12-Octadecadienoic acid, methyl ester	99	2.698
23.625	9,12,15-Octadecatrienoic acid, methyl ester, (Z,Z,Z)-	99	9.376							23.616	9,12,15-Octadecatrienoic acid, methyl ester	99	6.69
24.541	Methyl stearidonate	81	1.353							52.433	-	46	4.836
			100							55.404	1,4,7,10,13,16-Hexaoxanonadecane,	72	2.969
													99.999
OPR #1	JUL
RT	composition	quality	%		RT	composition	quality	%		OPR #3	JUL
12.068	Heptadecane	94	1.317		15.329	C14:0	99	4.516		RT	composition	quality	%		RT	composition	quality	%
14.554	2-Methyl-5-	50	0.319		15.867	C15:0	78	0.975		12.068	Heptadecane	97	1.135		15.329	C14:0	98	3.022
14.792	Eicosanal-	43	0.304		17.463	C16:0	99	23.899		14.554	4-Pyrimidinamine	50	0.342		16.334	C15:0	96	0.701
14.897	4-Pyrimidinamine	72	0.777		17.807	C16:1	99	9.137		14.897	Silane	64	0.614		17.463	C16:0	99	23.244
15.039	Octadecane, 1,1-dimethoxy-	50	0.385		18.327	C16:2	94	1.376		15.0393	Hexadecane, 1,1	72	0.444		17.807	C16:1	99	6.504
15.329	Myristic acid, methyl ester	99	4.516		18.82	C17:0	87	0.481		15.329	Myristic acid, methyl ester	98	3.022		18.327	C16:2	91	1.473
15.559	Methyl 2-	64	0.68		19.808	C16:4	90	4.327		15.55	4-Methylthiazole	72	0.73		18.82	C17:0	64	0.612
15.867	Pentadecanoic acid, methyl ester	78	0.975		20.548	C18:0	98	2.34		15.867	Tetradecanoic acid, 12-methyl, methyl ester	92	1.293		19.296	C16:3	83	1.439
16.211	Propane, 1,3-	53	0.571		20.962	C18:1	99	20.392		16.211	(Cyclo	40	0.646		19.799	C16:4	95	4.863
16.343	methyl	64	0.407		21.976	C18:2	99	5.49		16.334	Pentadecanoic acid, methyl ester	96	0.701		20.539	C18:0	96	2.807
16.643	Octaethylene glycol	35	0.521		23.633	C18:3	99	11.563		16.634	Ethanol, 2	35	0.739		20.954	C18:1	99	19.315
16.987	Cyclohexene,	43	0.67		24.541	C18:4	74	1.95		16.978	Ethanol, 2-bromo-	35	0.949		21.967	C18:2	99	5.665
17.463	Hexadecanoic acid, methyl ester	99	23.899					86.446		17.463	Hexadecanoic acid, methyl ester	99	23.244		23.625	C18:3	99	10.154
17.6393	1,4,10,13-tetraoxa-	38	0.502							17.718	9-Hexadecenoic acid, methyl ester	90	1.863					79.799
17.727	9-Hexadecenoic acid, methyl ester	93	2.101							17.807	9-Hexadecenoic acid, methyl ester	99	4.641	6.504
17.807	9-Hexadecenoic acid, methyl ester	99	7.036	9.137						18.124	1,4-Benzenedicarboxylic acid, dimethyl ester	86	3.515
18.124	(S)-2-(4-Methoxyphenyl)	80	2.325							18.327	7,10-Hexadecadienoic acid, methyl ester	91	1.473
18.327	7,10-Hexadecadienoic acid, methyl ester	94	1.376							18.529	Eicosane	64	0.982
18.529	TRICOSANE	94	1.364							18.75	Acetic acid,	38	0.602
18.759	1,4,7,10,13-Penta	43	0.535							18.82	Heptadecanoic acid, methyl ester	64	0.612
18.82	Heptadecanoic acid, methyl ester	87	0.481							19.296	methyl 8,11,14-heptadecatrienoate	83	1.439
19.296	Methyl 8,11,14-heptadecatrienoate	64	1.72							19.605	1,3-OXAZINANE	43	1.341
19.614	Dimethyl 3,6,9,12-tetraoxatetradecane-	47	1.157							19.799	Methyl 4,7,10,13-hexadecatetraenoate	95	4.863
19.808	Methyl 4,7,10,13-hexadecatetraenoate	90	4.327							20.539	Octadecanoic acid, methyl ester	96	2.807
20.548	Octadecanoic acid, methyl ester	98	2.34							20.954	9-Octadecenoic acid, methyl ester	99	15.878	19.315
20.962	9-Octadecenoic acid, methyl ester	99	17.562	20.392						21.103	9-Octadecenoic acid, methyl ester	99	3.437
21.103	9-Octadeceonic acid, methyl ester	99	2.83							21.967	9,12-Octadecadienoic acid, methyl ester	99	5.665
21.976	9,12-Octadecadienoic acid, methyl ester	99	5.49							23.625	9,12,15-Octadecatrienoic acid, methyl ester	99	10.154
23.633	9,12,15-Octadecatrienoic acid, methyl ester	99	11.563							52.433	1,4,7,10,13,16-Hexaoxacyclooctadecane	49	4.328
24.541	Methyl stearidonate	74	1.95							55.395	1,4,7,10,13,16-Hexaoxacyclooctadecane	90	2.542
			100										100.001
OPR #1	AUG									OPR #3	AUG
RT	composition	quality	%		RT	composition	quality	%		RT	composition	quality	%		RT	composition	quality	%
12.068	Heptadecane	96	1.239		15.329	C14:0	97	2.756		12.068	Heptadecane	94	1.158		15.329	C14:0	98	3.272
14.554	2-Azatricyclo	45	0.334		15.867	C15:0	96	1.477		14.554	4-Pyrimidinamine	64	0.6		16.334	C15:0	80	0.534
14.792	1-propyl	49	0.301		17.463	C16:0	99	25.156		14.792	4-Nonen	50	0.445		17.463	C16:0	99	17.099
14.898	4-Pyrimidinamine,	53	0.66		17.807	C16:1	99	6.413		14.897	4-Pyrimidinamine	59	0.9		17.806	C16:1	99	6.972
15.039	Octadecane, 1,1-dimethoxy	56	0.684		18.327	C16:2	98	2.214		15.038	Octadecane, 1,1	59	0.912		18.327	C16:2	97	1.651
15.329	Myristic acid, methyl ester	97	2.756		18.82	C17:0	93	0.637		15.329	Myristic acid, methyl ester	98	3.272		19.799	C16:4	95	6.264
15.55	4-Methylthiazole	64	0.583		19.296	C16:3	93	1.888		15.559	4-Methylthiazole	64	0.82		20.539	C18:0	98	2.713
15.867	Pentadecanoic acid, methyl ester	96	1.477		19.799	C16:4	95	4.826		15.867	Tetradecanoic acid, 12-methyl-,methyl ester	78	1.7		20.953	C18:1	99	11.67
16.211	Ethane, 1,1-dimethoxy-2-	43	0.414		20.548	C18:0	99	3.325		16.211	.alpha.-D-Xyloppyranoside	39	0.57		21.967	C18:2	99	6.424
16.343	Pentadecanoic acid, metthyl ester	92	0.696		20.962	C18:1	99	21.173		16.334	Pentadecanoic acid, methyl ester	80	0.534		23.625	C18:3	99	12.6994
16.643	3,6,9,12-Tetraoxahexadecan	27	0.526		21.976	C18:2	99	7.729		16.634	Hexaethylene glycol	27	0.805					69.2984
16.978	Cyclohexene, 2-propyl	38	0.697		23.625	C18:3	99	9.68		16.978	Cyclohexene,	32	0.925
17.463	Hexadecanoic acid, methyl ester	99	25.156		24.533	C18:4	80	1.731		17.463	Hexadecanoic acid, methyl ester	99	17.099
17.639	3,6,9,12,15-Pentaoxanonadecan-1-ol	35	0.41					89.005		17.639	4-(2',2',2	38	0.5112
17.727	9-Hexadecenoic acid, methyl ester,	98	2.109							17.718	9-Hexadecenoic acid, methyl ester,	98	1.732
17.807	9-Hexadecenoic acid, methyl ester,	99	4.304	6.413						17.806	9-Hexadecenoic acid, methyl ester,	99	5.24	6.972
17.965	2-Butanol, 3-methyl-3-nitro	43	0.582							18.124	1,3-Genzenedicarboxylic acid, dimethyl ester	41	3.065
18.133	Methyl 10-Methylhexadecanoate	64	1.13							18.327	7,10-Hexadecadienoic acid, methyl ester	97	1.651
18.327	7,10-Hexadecadienoic acid, methyl ester	98	2.214							18.529	Docosane	53	0.469
18.529	Octadecane, 1,1-dimethoxy	49	1.01							18.75	cyclopentanemethanol	27	0.845
18.759	3,4-O-Isopropylidene-2-O	37	0.501							18.82	Heptadecanoic acid, methyl ester	50	0.526
18.82	Heptadecanoic acid, methyl ester	93	0.637							19.296	methyl 8,11,14-heptadecatrienoate	53	1.216
19.296	Methyl 8,11,14-heptadecatrienoate	93	1.888							19.614	Dimethyl 3,6,9,12-tetraoxatetradecane-1,13-dioate	59	1.74
19.614	1,3-OXA	43	1.227							19.799	Methyl 4,7,10,13-hexadecatetraenoate	95	6.264
19.799	Methyl 4,7,10,13-hexadecatetraenoate	95	4.826							20.539	Octadecanoic acid, methyl ester	98	2.713
20.548	Octadecanoic acid, methyl ester	99	3.325							20.953	9-Octadecenoic acid, methyl ester	99	8.883	11.67
20.962	9-Octadecenoic acid, methyl ester	99	18.269	21.173						21.103	9-Octadecenoic acid, methyl ester	93	2.787
21.103	9-Octadecenoic acid, methyl ester	99	2.904							21.967	9,12-Octadecadienoic acid, methyl ester	99	6.424
21.976	9,12-Octadecadienoic acid, methyl ester	99	7.729							23.625	9,12,15-Octadecatrienoic acid, methyl ester	99	12.6994
23.625	9,12,15-Octadecatrienoic acid, methyl ester	99	9.68							24.533	Methyl stearidonate	58	1.305
24.533	Methyl stearidonate	80	1.731							52.433	1,4,7,10,13,16-Hexaoxacyclooctadecane	53	6.073
			99.999							53.861	1,4,7,10,13,16-Hexaoxacyclooctadecane	90	2.899
										55.404	1,4,7,10,13,16-Hexaoxacyclooctadecane	91	3.214
OPR #1	SEP												99.9966
RT	composition	quality	%		RT	composition	quality	%
12.068	Heptadecane	97	1.48		15.329	C14:0	99	3.469		OPR #3	SEP
14.554	1-(4-Fluorophe	59	0.561		15.867	C15:0	93	1.579		RT	composition	quality	%		RT	composition	quality	%
14.792	Neophytadiene	38	0.382		17.463	C16:0	99	16.631		12.068	Heptadecane	97	1.373		15.329	C14:0	98	3.14
14.897	2-Pyrimidinamine	59	0.949		17.806	C16:1	99	6.439		14.553	4-[2-(3,5	59	0.388		15.867	C15:0	95	1.586
15.038	Hexadecane,	64	0.876		18.326	C16:2	97	1.428		14.791	Neophytadiene	43	0.298		17.463	C16:0	99	16.704
15.329	Myristic acid, methyl ester	99	3.469		19.296	C17:3	70	1.458		14.897	4,n-	64	0.866		17.806	C16:1	99	6.506
15.558	4-Methylthiazole	64	0.857		19.807	C16:4	91	7.724		15.038	Hexadecane, 1,1	64	0.764		18.326	C16:2	94	1.411
15.867	Pentadecanoic acid, methyl ester	93	1.579		20.548	C18:0	99	2.649		15.329	Myristic acid, methyl ester	98	3.14		18.82	C17:0	76	0.474
16.343	methyl 13-methyltetradecanoate	47	0.402		20.962	C18:1	99	10.351		15.55	Hexaethioic acid,	59	0.7		19.296	C17:3	74	1.515
16.643	9-(3,3-Dimethyloxiran-2-yl)	32	0.58		21.976	C18:2	99	5.513		15.867	Pentadecanoic acid, methyl ester	95	1.586		19.799	C16:4	95	7.173
16.987	Cyclooctane,	43	0.869		23.624	C18:3	99	13.044		16.343	Methyl 13-methyltetradecanoate	70	0.463		20.539	C18:0	97	2.985
17.463	Hexadecanoic acid, methyl ester	99	16.631		49.189	C24:0	86	2.777		16.643	2-FURY	35	0.873		20.953	C18:1	99	10.479
17.639	Valeric acid, undec-2-enyl ester	35	0.419					73.062		16.978	Cyclohexene	38	0.88		21.967	C18:2	99	5.544
17.727	9-Hexadecenoic acid, methyl ester	96	1.73							17.463	Hexadecanoic acid, methyl ester	99	16.704		23.624	C18:3	99	12.825
17.806	9-Hexadecenoic acid, methyl ester	99	4.709	6.439						17.639	4-[(Tetrahy	47	0.518		24.532	C18:4	83	1.445
17.965	Methyl hexadec-9-enoate	47	0.967							17.718	9-Hexadecenoic acid, methyl ester	93	1.724		49.189	C24:0	52	1.05
18.124	1,4-BEN	45	2.296							17.806	9-Hexadecenoic acid, methyl ester	99	4.782	6.506				72.837
18.326	7,10Hexadecadienoic acid, methyl ester	97	1.428							17.965	8-Cyclohexaecan	25	0.924
18.767	Ethanol, 2-[2-(2-	43	0.216							18.132	METHYL 3-	50	1.141
19.296	Methyl 8,11,14-heptadecatrienoate	70	1.458							18.326	7,10-Hexadecadienoic acid, methyl ester	94	1.411
19.614	6,10,14-TRIMETHYL	47	1.215							18.758	D-(+)-Arabitol	38	0.509
19.807	Methyl 4,7,10,13-hexadecatetraenoate	91	7.724							18.82	Heptadecanoic acid	76	0.474
20.548	Octadecanoic acid, methyl ester	99	2.649							19.296	methyl 8,11,14-heptadecatrienoate	73	1.515
20.962	9-Octadecenoic acid, methyl ester	99	7.838	10.351						19.613	d-Ribose, 2	43	1.336
21.103	9-Octadecenoic acid, methyl ester	99	2.513							19.799	Methyl 4,7,10,13-hexadecatetraenoate	95	7.173
21.976	9,12-Octadecadienoic acid, methyl ester	99	5.513							20.539	Methyl stearate	97	2.985
23.624	9,12,15-Octadecatrienoic acid, methyl ester	99	13.044							20.953	9-Octadecenoic acid, methyl ester	99	7.824	10.479
24.532	Methyl stearidonate	52	1.598							21.103	9-Octadecenoic acid, methyl ester	99	2.655
49.189	Tetracosanoic acid, methyl ester	86	2.777							21.967	9,12-Octadecadienoic acid, methyl ester	99	5.544
52.433	1,4,7,10,13,16-Hexaoxacyclooctadecane	60	4.918							23.624	9,12,15-Octadecatrienoic acid, methyl ester	99	12.825
53.861	1,4,7,10,13,16-Hexaoxacyclooctadecane	87	4.655	13.272						24.532	Methyl stearidonate	83	1.445
55.404	1,4,7,10,13,16-Hexaoxacyclooctadecane	80	3.699							49.189	Tetracosanoic acid, methyl ester	52	1.05
			100.001							52.433	1,4,7,10,13,16-Hexaoxacyclooctadecane	60	4.59
										53.852	1,4,7,10,13,16-Hexaoxacyclooctadecane	74	6.987
OPR #1	OCT									55.395	1,4,7,10,13,16-Hexaoxacyclooctadecane	72	4.552
RT	composition	quality	%		RT	composition	quality	%					99.999
12.068	Heptadecane	97	0.829		15.329	C14:0	99	4.849
12.596	Eicosyl methyl ether	83	0.687		15.867	C15:0	95	1.961		OPR #3	OCT
14.553	4-[2-(3,5-	53	0.698		17.462	C16:0	99	14.954		RT	composition	quality	%		RT	composition	quality	%
14.791	Neophytadiene	68	0.357		17.806	C16:1	99	11.43		12.068	pentadecane	83	0.389		15.329	C14:0	96	1.346
14.897	4-[2-(3,5-	64	1.124		18.326	C16:2	98	1.716		14.554	4-Pyrimidinamine,	46	0.407		15.867	C15:0	50	0.871
14.994	2H-Cyclohepta	38	0.318		19.296	C17:3	83	1.084		14.792	(1S,4R)	83	0.375		17.463	C16:0	99	13.709
15.038	Dodecane, 1,1-dimethoxy-	72	0.452		19.799	C16:4	95	3.905		14.897	4-[2-(3,5	64	0.595		17.806	C16:1	93	4.804
15.329	Myristic acid, methyl ester	99	4.849		20.548	C18:0	99	2.345		15.038	Octadecane, 1,1	78	0.399		18.327	C16:2	97	0.996
15.558	2H-Pyran	50	2.145		20.953	C18:1	99	8.268		15.329	Myristic acid, methyl ester	96	1.346		19.296	C16:3	93	1.468
15.717	15-Crown-5	43	0.485		21.976	C18:2	99	5.757		15.55	4-Methylthiazole	59	0.662		19.799	C16:4	95	7.708
15.867	Pentadecanoic acid, methyl ester	95	1.961		23.624	C18:3	99	9.747		15.867	Pentadecanoic acid, methyl ester	50	0.871		20.539	C18:0	98	1.974
16.343	methyl 13-	64	0.651		24.541	C18:4	72	1.423		16.211	ANHYDROGLUCOPYRANOSE	40	0.487		20.954	C18:1	99	21.139
16.643	Cyclohexane, ethenyl	35	0.547		33.956	C20:5	72	2.648		16.643	Methyl 19-methyl-5,9	37	0.54		21.967	C18:2	99	5.888
16.978	endo, endo-6-	38	0.841					70.087		16.978	2,4-Hexadienal	22	0.628		23.625	C18:3	99	22.864
17.462	Hexadecanoic acid, methyl ester	99	14.954							17.463	Hexadecanoic acid, methyl ester	99	13.709		24.533	C18:4	81	1.775
17.639	4-(2',2',2'-Tri	38	0.504							17.639	15-Crown-5	38	0.365					84.542
17.727	9-Hexadecenoic acid, methyl ester	91	1.774							17.718	7-Hexadecenoic acid, methyl ester	62	0.935
17.806	9-Hexadecenoic acid, methyl ester	99	8.696	11.43						17.806	9-Hexadecenoic acid, methyl ester	93	1.401	4.804
17.965	9-Hexadecenoic acid, methyl ester	76	0.96							18.124	9-Hexadecenoic acid, methyl ester	46	2.468
18.124	Hexadecanoic acid, 15-methyl-	56	2.584							18.327	7,10-Hexadecadienoic acid, methyl ester	97	0.996
18.273	Bicyclo[2.2.1]	30	0.547							18.529	Docosane	62	0.922
18.326	7,10-Hexadecadienoic acid, methyl ester	98	1.716							18.759	1,4-Methanoazulen	27	0.523
18.6	3-(3-Methoxy-2,3-	52	0.835							19.296	7,10,13-Hexadecatrienoic acid, methyl ester	93	1.468
18.767	Octaethylene glycol	35	0.236							19.614	Dimethyl	40	0.847
19.296	Methyl 8,11,14-Heptadecatrienoate	83	1.084							19.799	Methyl 4,7,10,13-Hexadecatetraenoate	95	7.708
19.613	Dimethyl	42	1.205							20.539	Octadecanoic acid ,methyl ester	98	1.974
19.799	Methyl 4,7,10,13-hexadecatetraenoate	95	3.905							20.954	9-Octadecenoic acid, methyl ester	99	19.805	21.139
20.548	Octadecanoic acid, methyl ester	99	2.345							21.103	9-Octadecenoic acid, methyl ester	90	1.334
20.953	9-Octadecenoic acid, methyl ester	99	5.816	8.268						21.967	9,12-Octadecadienoic acid, methyl ester	99	5.888
21.103	9-Octadecenoic acid, methyl ester	99	2.452							23.625	9,12,15-Octadecatrienoic acid, methyl ester	99	22.864
21.976	9,12-Octadecatrienoic acid, methyl ester	99	5.757							24.533	Methyl stearidonate	81	1.775
23.624	9,12,15-Octadecatrienoic acid, methyl ester	99	9.747							49.18	1,4,7,10,13,16-Hexaoxacyclooctadecane	47	0.902
24.541	Methyl stearidonate	72	1.423							52.424	1,4,7,10,13,16-Hexaoxacyclooctadecane	49	3.643
33.956	Methyl eicosa-5,8,11,14,17-pentaenoate	72	2.648							53.861	1,4,7,10,13,16-Hexaoxacyclooctadecane	80	2.1
49.189	Tetracosanoic acid, methyl ester	38	2.722							55.404	1,4,7,10,13,16-Hexaoxacyclooctadecane	86	1.674
52.433	4-(1'-Hydroxypropyl)	64	4.418										100
53.861	1,4,7,10,13,16-HEXAOXACYCLOOCTADECANE	86	4.513
55.412	Octaethylene glycol monododecyl ether	72	3.188							OPR #3	NOV
			99.973							RT	composition	quality	%		RT	composition	quality	%
										12.068	Octadecane	72	0.34		15.338	C14:0	64	0.713
OPR #1	NOV									14.554	Silane,	59	0.411		17.463	C16:0	99	14.131
RT	composition	quality	%		RT	composition	quality	%		14.792	Neophytadiene	52	0.242		17.806	C16:1	97	4.183
12.068	Heptadecane	95	0.705		15.329	C14:0	98	3.392		14.897	1-(r-Fluoro	64	0.487		18.326	C16:2	96	0.555
14.21	2-Pyrimidinamine	43	0.17		17.462	C16:0	99	17.907		15.038	Octadecane, 1,1	72	0.515		19.296	C16:3	96	1.38
14.553	Dimethyl	64	0.511		17.806	C16:1	99	13.079		15.338	Myristic acid, methyl ester	64	0.713		19.799	C16:4	95	7.996
14.791	3,7,11,15-Tetramethyl-2-	80	0.438		18.326	C16:2	98	1.085		15.55	2H-1,2,4	53	0.469		20.539	C18:0	99	1.319
14.897	1-4(-Fluorophenyl)	80	0.937		19.296	C17:3	87	2.361		15.867	Pentadecanoic acid, 12-	35	0.598		20.962	C18:1	99	26.698
14.994	E-2.,4	53	0.342		19.799	C16:4	91	5.856		16.211	Formamide,	53	0.786		21.967	C18:2	99	3.709
15.038	Hexadecane, 1,1	78	0.458		20.539	C18:0	98	1.63		16.343	1,4,7,10,13,16-	47	0.21		23.624	C18:3	99	21.316
15.329	Myristic acid, methyl ester	98	3.392		20.953	C18:1	99	7.026		16.634	Triethylne	27	0.433		24.532	C18:4	87	2.312
15.55	2(3H)	72	0.816		21.976	C18:2	99	4.044		16.978	4-Ethyl	32	0.497		35.208	C22:0	87	1.325
15.867	Pentadecanoic acid, methyl ester	64	1.263		23.624	C18:3	99	16.108		17.463	Hexadecanoic acid, methyl ester	99	14.131					85.637
16.008	Hexadecanoic acid, methyl ester	50	0.468		24.532	C18:4	91	2.449		17.639	Ethanol,	43	0.28
16.211	1,1,3-Trime	42	0.419		30.509	C20:4 (AA)	87	1.246		17.718	9-Hexadecenoic acid, methyl ester	58	0.712
16.334	Methyl-13	93	0.655		33.956	C20:5 (EPA)	91	4.359		17.806	9-Hexadecenoic acid, methyl ester	97	1.171	4.183
16.643	Cyclohexene,	38	0.75					80.542		18.124	9-Hexadecenoic acid, methyl ester	53	2.3
16.907	Ethanol,	47	0.207							18.326	7,10-Hexadecadienoic acid, methyl ester	96	0.555
16.978	Octanoic acid, 20furanyl	38	0.88							18.529	Hentriacontane	64	0.691
17.154	3,6,9,12,15-PENTAOXA	35	0.263							18.75	Pentadecanoic acid, 12-	27	0.48
17.462	Hexadecanoic acid, methyl ester	99	17.907							19.296	7,10,13-Hexadecatrienoic acid, methyl ester	96	1.38
17.63	4-[Tetra	50	0.47							19.605	Dimethyl	50	0.775
17.727	cyclopropane,	86	0.861							19.799	Methyl 4.7.10.13-hexadecatetraenoate	95	7.996
17.806	9-Hexadecenoic acid, methyl ester	99	12.619	13.079						20.539	Octadecanoic acid, methyl ester	99	1.319
17.965	9-Hexadecenoic acid, methyl ester	45	0.46							20.962	9-Octadecenoic acid, methyl ester	99	25.49	26.698
18.214	Chclopropane	49	2.145							21.094	9-Octadecenoic acid, methyl ester	87	1.208
18.326	7,10-Hexadecadienoic acid, methyl ester	98	1.085							21.967	9,12-Octadecadienoic acid, methyl ester	99	3.709
18.529	Docosane	49	0.402							23.624	9,12,15-Octadecatrienoic acid, methyl ester	99	21.316
18.608	9,12-Octadecadien-1-	86	0.91							24.532	Methyl stearidonate	87	2.312
18.758	PSEUDO-ISOPRENOIC ACID	22	0.435							26.454	Methyl 9-eicosenoate	64	1.22
19.129	methyl 8,11,14,17-eicosatetraenoate	80	1.031							35.208	Docosanoic acid, methyl ester	87	1.325
19.296	Methyl 8,11,14-Heptadecatrienoate	87	1.33	2.361						49.189	1,4,7,10,13,16-Hexaoxacyclooctadecane	49	1.327
19.613	d-Ribose,	50	1.405							49.788	1,4,7,10,13,16-Hexaoxacyclooctadecane	87	0.225
19.799	Methyl 4,7,10,13-hexadecatetraenoate	91	5.856							52.442	1,4,7,10,13,16-Hexaoxacyclooctadecane	53	2.866
20.539	Methyl stearate	98	1.63							53.879	1,4,7,10,13,16-Hexaoxacyclooctadecane	90	1.513
20.953	9-Octadecenoic acid, methyl ester	99	5.009	7.026									100.002
21.103	9-Octadecenoic acid, methyl ester	99	2.017
21.976	9,12-Octadecadienoic acid, methyl ester	99	4.044
23.624	9,12,15-Octadecatrienoic acid, methyl ester	99	16.108
24.532	Methyl stearidonate	91	2.449
30.509	Arachidonic acid	87	1.246
33.956	Ethyl 5,8,11,14,17-icosapentaenoate	91	4.359
49.189	1,4,7,10,13,16-Hexaoxacyclooctadecane	50	0.86
52.433	1,4,7,10,13,16-Hexaoxacyclooctadecane	60	2.686
			99.998

## Sheet: Fig. S2
Mean temp.										Max temp.										Min temp.										Sunshine hour										Precipitation
	APR	MAY	JUN	JUL	AUG	SEP	OCT	NOV			APR	MAY	JUN	JUL	AUG	SEP	OCT	NOV			APR	MAY	JUN	JUL	AUG	SEP	OCT	NOV			APR	MAY	JUN	JUL	AUG	SEP	OCT	NOV			APR	MAY	JUN	JUL	AUG	SEP	OCT	NOV
1	7.9	19.3	23.9	26.1	26.3	21.4	15.2	10.3		1	12.1	25.7	31.7	29.1	32.3	28.1	20	18.9		1	4.9	13	18.8	23.9	22.6	16.2	10.2	2		1	4.25	11.22	9.78	0.03	6.85	10.07	0.27	8.97		1	6	0	0	1	12	0	7	0
2	9.1	17.2	21.5	26.5	27.2	20	19.4	12.6		2	16.1	26.2	28.5	31	32.7	27	23.2	20.7		2	2.1	7.5	13.3	23.9	24	14.2	16	6.8		2	10.78	11.6	12.38	1.42	6.82	9.37	1.02	7.98		2	0	0	0	3	0	0	10.5	0
3	12.2	19.4	21.4	27.5	27.1	20.9	20.3	12.1		3	21.8	29	26.6	31.8	33.8	28.6	25.8	20.8		3	2.1	7.9	16.4	25.5	21.2	14.4	16.9	6.6		3	11.17	12.22	11.52	0.65	9.33	10.33	5.72	6.93		3	0	0	0	0.5	0	0	0	0
4	13.8	20.1	21	26.6	29.3	21.5	17.9	8.8		4	22.9	27.5	28.8	30.2	35.8	28.4	22	14.2		4	2.1	10.5	11.8	24.3	23.3	16.3	15	4.1		4	10.15	8.97	12.25	2.72	11.87	7.87	5.07	8.22		4	0	0	0	6.5	0	0	0	0
5	14.5	19.9	21	28.1	29.9	20.2	16.7	7.8		5	17.6	25.8	28.5	33.8	36.3	23.5	21.1	16.2		5	11.8	14.3	13.9	23.2	24.5	17.6	13.1	1.4		5	0.22	6.02	12.1	11.07	10.42	0.02	3.4	9.5		5	5.5	4	0	0	1	1	0	0
6	16.2	18.4	17.8	27	30.4	20.9	15.8	7.7		6	20	24.5	21.7	31.2	37.6	24.7	17.6	19.1		6	10.9	10.8	14.7	24.4	24.7	18.1	14.2	0.6		6	0.4	11.32	0.43	5.12	11.82	0	0	9.02		6	9.5	0	11	0	0	2.5	7.5	0
7	15.5	17.1	19.9	26.1	29.1	21.8	19.6	11.2		7	24.5	27.2	24.3	28.3	34.4	28.5	24.1	20.1		7	8.6	7.8	16.8	24.2	24.7	17.9	16.3	2.2		7	11.23	12	0.1	0	11.43	7.75	3.6	7.8		7	0	0	0.5	1	5	0	0	0
8	17.9	18.5	21.7	26.3	28.4	22.1	20	14.6		8	27.1	27.3	27.7	28.2	34.5	29.5	27.1	21.2		8	8.3	8.1	17.4	25.1	23.3	15.9	15.1	7.7		8	10.2	8.07	9.53	0.48	7.98	9.93	7.87	8.45		8	0	0	0	12	0	0	0	0
9	14.4	15.7	23.3	28.2	25.6	22.5	21	9.2		9	18.4	18.2	31.9	33.8	27.3	29.4	28.5	17.5		9	8	13.8	15.4	24.8	24.1	16.3	15.1	3.5		9	0.8	0	10.88	6.9	0	8.37	7.95	9.38		9	0	14	0	0	7.5	0	0	0
10	11.8	16	22.4	28	25.4	22.5	21.6	11.1		10	19.2	21.4	28.3	30.6	27.7	29	28.5	22.2		10	4.6	12.4	16.9	26.1	24.2	17.2	16.6	2		10	10.42	2.12	2.12	1.28	0.82	4.65	7.57	6.88		10	0	0	0	0	13	0	0	0
11	12.5	18.9	21.9	28.9	26.5	20.4	19.7	7.4		11	19.4	28.5	29.5	33.5	32.3	22.5	22.1	12.4		11	8	12.2	15.8	25.3	22.7	18.5	15.7	0.6		11	5.97	10.43	11.67	8.67	8.15	0	0	9.32		11	20.5	0	0	0	0	47.5	0.5	0
12	14.1	18.3	19.9	28.8	25.4	22.9	14.3	5		12	19.1	20.3	25	34.8	30.8	29.9	15.7	14.4		12	9.8	14.2	14.7	24	20.8	17.2	13.1	-1.5		12	9.52	0	10.25	11.42	8.17	10.95	0	8.72		12	0	1	0	1.5	0	0	22.5	0
13	13.5	19.1	20.5	28.7	23.6	20.8	13.8	6.3		13	22.8	26.9	26.4	36.1	27.1	27.9	19.8	14.7		13	3.2	11.8	15.1	22.1	20.2	14	7.9	-0.9		13	10.47	10.15	7.37	11.75	0.7	11.07	10	4.13		13	0	0.5	3.5	4	0	0	0	0
14	14.9	18.4	21.5	26.4	22.3	20	14.3	9		14	21.4	24.7	28.3	34.1	24.1	27.8	20.6	15.6		14	6	10.3	15.1	22.4	21.2	13.7	9.2	3.4		14	7.22	12.22	10.5	7.33	0	10.18	8.98	8.88		14	0	0	0	34	78	0	0	0
15	18.6	17.4	24.9	24.8	23.2	19.8	14.4	5.9		15	27.3	24.6	32	27.4	24.5	25.3	19	10.8		15	10.1	8.2	17.7	23.2	21.6	15.3	11.2	1.8		15	10.3	12.27	12.42	0.33	0	7.42	1	4.68		15	0	0	0	8	5	0	1	0
16	18.4	17.5	23.4	27	25.3	20.1	15.1	4.3		16	28.8	23.1	30.6	32.2	29.7	24.8	19.9	10.3		16	7.7	10.9	15.9	24.3	22.4	15.7	10.7	-1.3		16	10.27	6	12	2.78	3.83	1.37	1.38	9.25		16	0	0	0	0	0.5	0	0	0
17	13.5	19.3	24.6	26.4	24.8	21.9	14.8	4.2		17	16.1	26.8	32.5	32.7	29	25.5	21.7	10		17	12.1	10.6	16.7	22.7	22.3	17.4	10.1	-2.9		17	0	11.38	12	3.35	4.8	0.35	6.33	4.02		17	15	0	0	8.5	2.5	0	0	0
18	15	21.5	27	26.4	25.9	20.7	15.1	3.2		18	22.6	29.1	35.2	31.1	31.4	28.7	19	8		18	8.3	11.9	19	22.5	21.6	14.3	11.8	-2.1		18	7.47	12.22	12.03	6.15	7.62	10.42	0.32	8.88		18	1	0	0	0	8.5	0	0	0
19	15.1	23.5	27.3	28.1	25.4	20.7	15.1	1.1		19	21	31.6	35	34	30.6	28.3	20.3	5.6		19	9	13.2	17.9	22.6	22.8	13.7	10.9	-2.4		19	11.68	12.3	11.72	10.48	4.83	8.35	4.65	8.38		19	0	0	0	0	15.5	0	0	0
20	12.9	23.2	24.8	29.3	25.1	20.4	15.6	4.5		20	18.3	31.2	29.2	34.9	28.6	25.4	22.2	9.3		20	9	14.2	20.8	24.4	23	12.8	10.8	-0.9		20	2	12.22	2.25	11.17	0.72	5.95	6.58	8.88		20	1.5	0	0	0	2.5	0	0	0
21	13.9	22.1	24.5	30.2	25.9	17.6	14.2	3.1		21	21.1	30	30.5	35.6	31	26.3	22.5	11.3		21	7	13.4	18.3	26.1	23.8	10.7	10.1	-2.7		21	9.9	9.3	8.47	9.23	5.18	10.48	7.12	8.73		21	0	0	0	0	17	0	0	0
22	14.1	22.5	25.9	29.4	26.7	19.1	15.9	3.9		22	20.9	30.9	33.1	35.3	32.3	26.9	22.3	8.5		22	6.8	13.2	17.7	26	23.4	13.1	10.5	-0.9		22	9.92	12.33	12.1	4.53	6.78	10.5	7.66	0.15		22	0	0	0	0	0	0	0	0
23	15.5	21.6	27.3	27.2	28.9	19.7	13.4	2.8		23	23.4	26.7	34.3	30.1	34	27	18	7		23	6.9	15.7	20	24.3	25.6	14.2	7.8	-2.4		23	11.72	5.53	10.7	0	5.45	8.1	9.97	7.72		23	0	0	0	0	0	0	0	0
24	15.9	21.4	25.8	28	29.3	20.6	11.6	1.5		24	24.4	26.4	32	34	34.8	28.4	16.9	7.7		24	6.5	18.3	21.2	25.9	25.7	14.2	6.7	-2.9		24	11.45	5.32	6.73	2.85	7.52	8.87	3.53	3.78		24	0	1	1.5	8	3.5	0	0	0.5
25	17.6	22.3	23.4	26.2	27.3	21.9	11.2	3		25	24.2	31.5	28.9	29.4	32.9	29.7	20	9.8		25	10.5	15.3	19	22.9	21.7	16.9	5	-4.5		25	5	10.7	6.6	0.43	9.63	9.33	7.72	7.98		25	0	0	85.5	7.5	0.5	0	0	0
26	16.4	18.1	22.2	25.4	23.8	21.4	11.5	6.1		26	22.4	23.9	27.9	31.7	30.1	28.8	19.5	12.7		26	12.3	13.1	19.7	19.5	17.7	14.1	5.3	1.1		26	7.38	11.13	2.2	8.42	11.1	9.92	3.97	4.73		26	1.5	0	10	0	0	0	0	0
27	14.7	19.9	23.8	25.2	22.9	18.6	14.2	4		27	20.6	27.9	28.2	34.4	30.6	21.2	20.9	12.5		27	9	11.1	20.2	17	16	16.3	9.4	-0.9		27	10.9	12.1	4.9	12.2	10.77	0	5.25	7.95		27	0	0	0	0	0	41.5	0	0
28	15.1	21.6	25.6	27.6	24.7	20.2	15.2	5.5		28	26.3	29.9	31.6	34	30.3	26.7	21.1	13.2		28	3.7	12.6	19.4	22.4	18.5	14.5	9.3	-0.2		28	10.97	12.05	10.17	7.8	8.43	8.28	3.5	5.17		28	0	0	0	4.5	0	0	0	0
29	17	25.2	24.8	24.1	25	16.2	14.4	8.5		29	27.7	35	28.8	25.9	30.1	21.8	21	13.5		29	6.6	15.7	21.4	22.8	20.1	10.7	8.1	2.3		29	11.77	11.8	5.63	0	10.92	9.95	8.87	4.58		29	0	0	0	31	0.5	0	0	0
30	20.6	24.5	26.1	25.5	20.2	15.5	8.2	3.6		30	31.9	31.6	31.1	30.1	22.8	25.9	14.8	7.5		30	8.7	16	21.9	22.5	17.2	7	2.5	-1.9		30	11.6	8.3	9.2	2.15	0.78	10.63	9.95	7.22		30	0	0	0	0	0	0	0	0
31		22.9		24.6	21.4		7.6			31		29.3		26.9	28.2		18.2			31		16.8		22.8	15.2		-0.2			31		5.3		0	11.08		9.92			31		0		20	0		0

## Sheet: Fig. S5, S6
2018_weather														Pod weight
	1st assay_weather							2nd assay_weather							OPR#1		OPR#3
Days	Mean Temp	Max Temp	Min Temp	Precipitation	Sunshine		Days	Mean Temp	Max Temp	Min Temp	Precipitation	Sunshine		1	3.44	0.35	3.79	0.46
0	30.2	36.7	24	0	11.68		0	30.2	36.7	24	0	11.68		2	3.85	0.38	4.21	0.54
1	30.6	36.7	24.6	0	11.93		1	30.6	36.7	24.6	0	11.93		3	4.31	0.33	4.19	0.38
2	30	34	25.8	0	10.21		2	30	34	25.8	0	10.21		4	4.41	0.38	6.1	0.52
3	30.4	36.4	25.4	0	11.45		3	30.4	36.4	25.4	0	11.45		5	4.35	0.41	5.54	0.44
4	31	36.8	26	0	12.1		4	31	36.8	26	0	12.1		6	3.2	0.29	4.02	0.21
5	31.1	36.6	25.9	0	11.12		5	31.1	36.6	25.9	0	11.12
6	31.7	37	26.6	0	11.92		6	31.7	37	26.6	0	11.92
7	32.2	38.4	26.9	0	11		7	32.2	38.4	26.9	0	11
8	30.8	35.9	26.4	0	7.17		8	30.8	35.9	26.4	0	7.17
9	29.9	36.4	24.3	0	9.53		9	29.9	36.4	24.3	0	9.53
10	29.1	33.6	24.6	0	4		10	29.1	33.6	24.6	0	4
11	29.1	35.8	23.4	0	11.6		11	29.1	35.8	23.4	0	11.6
12	30.2	38	22.6	0	12.1		12	30.2	38	22.6	0	12.1
13	30.6	37.6	23.4	0	11.28		13	30.6	37.6	23.4	0	11.28
14	30.4	36.3	24.4	0	12.12		14	30.4	36.3	24.4	0	12.12
15	31.1	37.4	25.5	0	11.57		15	31.1	37.4	25.5	0	11.57
16	31.3	36.2	26.5	0	8.1		16	31.3	36.2	26.5	0	8.1
17	30.5	35.8	26.9	2.5	8.97		17	30.5	35.8	26.9	2.5	8.97
18	29.1	33.6	26.2	0	6.97		18	29.1	33.6	26.2	0	6.97
19	30.1	37.5	23.8	0	11.35		19	30.1	37.5	23.8	0	11.35
20	30.1	37.1	25.3	0.5	10.93		20	30.1	37.1	25.3	0.5	10.93
21	27	31	25.1	39	3.1		21	27	31	25.1	39	3.1
22	27.1	31.1	24.2	0	1.47		22	27.1	31.1	24.2	0	1.47
23	27.5	32.9	23.5	0	4.85		23	27.5	32.9	23.5	0	4.85
24	30	35.3	25.2	0	10.94		24	30	35.3	25.2	0	10.94
25	30.2	37.3	23.9	0	11.58		25	30.2	37.3	23.9	0	11.58
26	29.7	36.2	23.6	0	8.33		26	29.7	36.2	23.6	0	8.33
27	26.7	32.1	24.6	17	5.03		27	26.7	32.1	24.6	17	5.03
28	24.1	28.6	18.4	0	3.25		28	24.1	28.6	18.4	0	3.25
29	23.2	29.4	17.6	0	10.23		29	23.2	29.4	17.6	0	10.23
30	24.9	32.4	18.4	0	11.52		30	24.9	32.4	18.4	0	11.52
31	26.7	32.1	20.5	0	11.25		31	26.7	32.1	20.5	0	11.25
32	28.2	35.1	22.4	0	11.43		32	28.2	35.1	22.4	0	11.43
33	28.8	34.2	22.6	0	9.25		33	28.8	34.2	22.6	0	9.25
34	28.7	30.6	25.5	2	0.22		34	28.7	30.6	25.5	2	0.22
35	28.2	33.3	23.6	14.5	4.75		35	28.2	33.3	23.6	14.5	4.75
36	24.8	29.7	20.8	0	2.93		36	24.8	29.7	20.8	0	2.93
37	20.4	24.5	19.2	83.5	0		37	20.4	24.5	19.2	83.5	0
38	22.6	24.8	19.7	44.5	0		38	22.6	24.8	19.7	44.5	0
38	26.2	30.8	23.3	2	1.9		38	26.2	30.8	23.3	2	1.9
40	27.2	32.4	24.3	0	9.2		40	27.2	32.4	24.3	0	9.2
41	26.7	30.2	24.8	5	2.33		41	26.7	30.2	24.8	5	2.33
42	22.8	25.3	19.7	40	0.18		42	22.8	25.3	19.7	40	0.18
43	23.4	29	18.9	0	6.88		43	23.4	29	18.9	0	6.88
44	21.8	25.4	17.3	0	3.17		44	21.8	25.4	17.3	0	3.17
45	23.3	25.6	21	9	0.2		45	23.3	25.6	21	9	0.2
46	24.5	30.1	20.8	69.5	9.05		46	24.5	30.1	20.8	69.5	9.05
47	23.6	30	17.9	0	11.05		47	23.6	30	17.9	0	11.05
48	21.3	25.9	15.9	0	2.8		48	21.3	25.9	15.9	0	2.8
49	22.1	25.7	18.3	2	1.8		49	22.1	25.7	18.3	2	1.8
50	19.1	24.2	14.7	0	3.73		50	19.1	24.2	14.7	0	3.73
51	20.3	27.9	15	0	7.95		51	20.3	27.9	15	0	7.95
52	20.7	26	14.8	0	8.35		52	20.7	26	14.8	0	8.35
53	18.7	24.2	13.5	0	6.57		53	18.7	24.2	13.5	0	6.57
54	20.8	26.7	16.3	0	9.23		54	20.8	26.7	16.3	0	9.23
55	20.2	23.7	18	0	0.98		55	20.2	23.7	18	0	0.98
56	21.1	22.9	19.4	6.5	0		56	21.1	22.9	19.4	6.5	0
							57	21.7	23.8	20	6	0.16
							58	23.5	27.9	20.9	0	4.16
							59	22.5	29.3	17.3	0	6.95
							60	21.2	28.7	15.4	0	10.75
							61	21	25.6	16.4	0	1.78
							62	20	21.2	19	7.5	0
							63	19.2	20	18.7	29	0
							64	20.3	27.9	15.2	0	8.6
							65	18.9	26.1	12.9	0	8.13
							66	16.3	22.2	10.8	0	0.63
							67	16	24.9	9.6	0	9.11
							68	17.2	23.5	12.5	0	5.91
							67	16.4	24	11	0	8.26
							70	16.5	21.8	10.9	0	3.75
							71	18.7	22.1	15.8	0	0.6
							72	20.2	27.1	15.8	0	9.43
							73	16.6	21.1	11.7	0	8.25
							74	16.4	23.5	10.2	0	10.43
							75	15	23.8	8.1	0	10.45
							76	17.5	24.9	10.1	0	9.76
							77	17.6	18.4	16.2	50	0
							78	19.4	22	17.4	71	1.26
							79	18.6	26.1	13.1	0	10.38
							80	15.3	21.4	10.3	0	10
							81	14.5	19.7	10.6	0	1.81
							82	15.2	19.4	8.9	0	6.55
							83	11.2	16.8	5.2	0	10.33
							84	9.8	17.7	3.9	0	10.48
							85	11.9	20.9	5.5	0	7.5
							86	13.1	20.4	6.8	0	7.9
							87	14.1	21.1	7.6	0	9.9
							88	12.6	17.3	7.6	0	0.86
							89	12	19.6	7.3	0	8.31
							90	11.6	17.7	4.4	0.5	9.08
							91	11.7	19.2	6.5	0	10.16
							92	10.8	20.7	4.8	0	9.98
							93	10.5	21.2	3.8	0	10.03
							94	11.8	19.7	5	0	7.93
							95	13.9	21.5	9.5	0	6.6
							96	12.2	20.1	5.8	0	10
							97	11.2	20.6	4.4	0	9.78
							98	11.2	13.7	7.3	3	0
							99	11.4	16.1	6.5	0	4.52
							100	10.7	17.9	5.1	0.5	6.21
							101	9.3	14.7	3.4	0.5	3.71
							102	8	14	2.5	0	9.95
							103	8.2	16.1	1.8	0	8.25
							104	7.2	16.7	0.2	0	9.73
							105	7.4	18.6	0.3	0	9.78
							106	8	19.9	0.6	0	9.46
							107	8.7	20.1	0.7	0	9.38
							108	9.1	19.2	1.8	0	9.35
							109	10.8	20.8	3.8	0	8.85
							110	12.6	15.4	9	0.5	0
							111	14.3	17.1	12.7	12.5	0
							112	13.1	15.9	5.9	0	1.65
							113	9.4	18.7	2.7	0	8.53
							114	8.8	14.5	3.4	0.5	1.5
							115	10.2	15.4	5	0	8.33
							116	8.9	16.2	4.4	0	3.23
							117	8.5	16.8	3.4	0	8.6
							118	7.6	15.5	2.2	0	7.9
							119	7.1	13	3	0	0.05
							120	7.6	14.6	2.1	0	0.18
							121	6.5	11.1	1.8	0	0
							122	6.6	13.8	0.5	0	8.8
							123	5.9	13.5	-0.1	0	9
							123	5.5	11.8	-0.6	0	2.8

[truncated: 1 more sheets: Fig. S11, S12]
